# Supplementary material for: Dose–response association between physical activity and non-alcoholic fatty liver disease: a case–control study in a Chinese population
Source: PubMed Central journal article supplement — BMJ Open. 2019 Mar 30;9(3):e026854. doi: 10.1136/bmjopen-2018-026854 (PMC6475196; doi:10.1136/bmjopen-2018-026854), 2019-03-30
Supplement: bmjopen-2018-026854.draft_revisions.pdf [file bmjopen-2018-026854.draft_revisions.pdf]

# BMJ Open

BMJ Open is committed to open peer review. As part of this commitment we make the peer review history of every article we publish publicly available.

When an article is published we post the peer reviewers' comments and the authors' responses online. We also post the versions of the paper that were used during peer review. These are the versions that the peer review comments apply to.

The versions of the paper that follow are the versions that were submitted during the peer review process. They are not the versions of record or the final published versions. They should not be cited or distributed as the published version of this manuscript.

BMJ Open is an open access journal and the full, final, typeset and author-corrected version of record of the manuscript is available on our site with no access controls, subscription charges or pay-per-view fees (<http://bmjopen.bmj.com>).

If you have any questions on BMJ Open's open peer review process please email [info.bmjopen@bmj.com](mailto:info.bmjopen@bmj.com)

# BMJ Open

## The dose-response association between physical activity and non-alcoholic fatty liver disease: a case-control study in a Chinese population

|                               |                                                                                                                                                                                                                                                                                                                                                                                                                                                                                                                                                                                                                                                                                                                                                                                                                                                                                                                                                                                                                                                                                                                                                                                                                                                                                                                                                                                                                                                                              |
|-------------------------------|------------------------------------------------------------------------------------------------------------------------------------------------------------------------------------------------------------------------------------------------------------------------------------------------------------------------------------------------------------------------------------------------------------------------------------------------------------------------------------------------------------------------------------------------------------------------------------------------------------------------------------------------------------------------------------------------------------------------------------------------------------------------------------------------------------------------------------------------------------------------------------------------------------------------------------------------------------------------------------------------------------------------------------------------------------------------------------------------------------------------------------------------------------------------------------------------------------------------------------------------------------------------------------------------------------------------------------------------------------------------------------------------------------------------------------------------------------------------------|
| Journal:                      | <i>BMJ Open</i>                                                                                                                                                                                                                                                                                                                                                                                                                                                                                                                                                                                                                                                                                                                                                                                                                                                                                                                                                                                                                                                                                                                                                                                                                                                                                                                                                                                                                                                              |
| Manuscript ID                 | bmjopen-2018-026854                                                                                                                                                                                                                                                                                                                                                                                                                                                                                                                                                                                                                                                                                                                                                                                                                                                                                                                                                                                                                                                                                                                                                                                                                                                                                                                                                                                                                                                          |
| Article Type:                 | Research                                                                                                                                                                                                                                                                                                                                                                                                                                                                                                                                                                                                                                                                                                                                                                                                                                                                                                                                                                                                                                                                                                                                                                                                                                                                                                                                                                                                                                                                     |
| Date Submitted by the Author: | 25-Sep-2018                                                                                                                                                                                                                                                                                                                                                                                                                                                                                                                                                                                                                                                                                                                                                                                                                                                                                                                                                                                                                                                                                                                                                                                                                                                                                                                                                                                                                                                                  |
| Complete List of Authors:     | <p>li, yangfan; Department of Epidemiology and Health Statistics, Fujian Provincial Key Laboratory of Environment Factors and Cancer, School of Public Health, Fujian Medical University, Fujian, China</p> <p>He, Fei; Department of Epidemiology and Health Statistics, Fujian Provincial Key Laboratory of Environment Factors and Cancer, School of Public Health, Fujian Medical University, Fujian, China</p> <p>he, yun; Key Laboratory of Ministry of Education for Gastrointestinal Cancer, Fujian Medical University, Fujian, China</p> <p>pan, xinting; Department of Epidemiology and Health Statistics, Fujian Provincial Key Laboratory of Environment Factors and Cancer, School of Public Health, Fujian Medical University, Fujian, China</p> <p>hu, zhijian; Department of Epidemiology and Health Statistics, Fujian Provincial Key Laboratory of Environment Factors and Cancer, School of Public Health, Fujian Medical University, Fujian, China</p> <p>lin, xu; Key Laboratory of Ministry of Education for Gastrointestinal Cancer, Fujian Medical University, Fujian, China</p> <p>xu, shanghua; Department of Cardiology, Affiliated Nanping First Hospital, Fujian Medical University, Nanping, China</p> <p>Peng, Xian-E; Fujian Medical University, Department of Epidemiology and Health Statistics, Fujian Provincial Key Laboratory of Environment Factors and Cancer, School of Public Health, Fujian Medical University, Fujian, China</p> |
| Keywords:                     | Lipid disorders < DIABETES & ENDOCRINOLOGY, Hepatology < INTERNAL MEDICINE, PUBLIC HEALTH, SPORTS MEDICINE                                                                                                                                                                                                                                                                                                                                                                                                                                                                                                                                                                                                                                                                                                                                                                                                                                                                                                                                                                                                                                                                                                                                                                                                                                                                                                                                                                   |
|                               |                                                                                                                                                                                                                                                                                                                                                                                                                                                                                                                                                                                                                                                                                                                                                                                                                                                                                                                                                                                                                                                                                                                                                                                                                                                                                                                                                                                                                                                                              |

SCHOLARONE™  
Manuscripts

1  
2  
3  
4  
5 ***The dose-response association between physical activity and***  
6 ***non-alcoholic fatty liver disease: a case-control study in a***  
7 ***Chinese population***  
8  
9  
10  
11  
12  
13  
14

15 YangFan Li<sup>1¶</sup>, Fei He<sup>1¶</sup>, Yun He<sup>2</sup>, XinTing Pan<sup>1</sup>, ZhiJian Hu<sup>1</sup>, Xu Lin<sup>2</sup>,

16  
17  
18 ShangHua Xu<sup>3\*</sup> and XianE Peng<sup>1,2\*</sup>  
19  
20

21  
22 <sup>1</sup> Department of Epidemiology and Health Statistics, Fujian Provincial Key

23  
24 Laboratory of Environment Factors and Cancer, School of Public Health, Fujian  
25  
26 Medical University, Fujian, China;

27  
28  
29 <sup>2</sup> Key Laboratory of Ministry of Education for Gastrointestinal Cancer, Fujian  
30  
31 Medical University, Fujian, China;

32  
33  
34  
35 <sup>3</sup> Department of Cardiology, Affiliated Nanping First Hospital, Fujian Medical  
36  
37 University, Nanping, China

38  
39  
40 ¶ Both authors contributed equally to this work.

41  
42  
43 \* Correspondence: [fmuxe@163.com](mailto:fmuxe@163.com) (X.E.P.) or  
44  
45 [13365998866@163.com](mailto:13365998866@163.com)(S.H.X.);  
46  
47  
48

49 Word count:2597  
50  
51  
52  
53

54 **Running title:** Exercise and non-alcoholic fatty liver disease  
55  
56  
57  
58  
59  
60

---

## Abstract

**Aim:** Physical activity plays an important role in the development of non-alcoholic fatty liver disease (NAFLD). However, the optimal intensity and dose of physical activity for the treatment of NAFLD have yet to be found. In the present study, we aimed to provide a dose-response association between physical activity and NAFLD in a Chinese population.

**Methods:** We recruited 543 patients with NAFLD diagnosed by abdominal ultrasonography, and 543 age- and sex-matched controls. The amount of physical activity, sedentary time and energy intake was collected through a structured questionnaire. Logistic regression analyses were performed to investigate the association between physical activity and NAFLD.

**Results:** After adjusting for age, gender, blood pressure, body mass index (BMI), energy intake and sedentary time, the total amount of physical activity was found to be inversely associated with NAFLD in a dose-dependent manner ( $>3943.8$  MET-min/week vs.  $\leq 1620$  MET-min/week: OR=0.67, 95% CI=0.47-0.96,  $P$  for trend=0.03). In addition, both moderate- and vigorous-intensity physical activity were effective in reducing the risk of NAFLD, independent of confounding variables (Moderate-intensity physical activity:  $>840$  MET-min/week vs. none: OR=0.69, 95%CI= 0.48-0.98,  $P$  for trend=0.04; Vigorous-intensity physical activity:  $>960$  MET-min/week vs. none: OR=0.65, 95%CI=0.44-0.94,  $P$  for trend=0.02).

**Conclusions:** Physical activity was inversely associated with risk of NAFLD in a dose-dependent manner. Vigorous- and moderate-intensity physical activity were both beneficial to NAFLD, independent of sedentary time and energy intake.

**Key words:** Energy intake; Metabolic Equivalent of Energy ; non-alcoholic fatty liver disease; physical activity

### **Strengths and limitations of this study**

- This study had a considerable sample size and several potential confounding variables such as energy intake and sedentary time, were taken into account.
- The intensity of physical activity was measured in terms of Metabolic Equivalent of Energy (MET) and dose of physical activity was presented in the form of MET-min/week
- This study was a case-control design, thus the causal association between physical activity and NAFLD could not be precisely identified.

### **Introduction**

Non-alcoholic fatty liver disease (NAFLD) is defined as fat accumulation in more than 5% of hepatocytes, without competing liver disease such as viral hepatitis or autoimmune hepatitis.<sup>[1]</sup> It encompasses a broad spectrum of hepatic dysfunction ranging from simple hepatic lipid accumulation (steatosis) to non-alcoholic steatohepatitis (NASH), fibrosis, cirrhosis and finally hepatocellular carcinoma.<sup>[2]</sup> A meta-analysis indicated that 25.24% of global population have NAFLD,<sup>[3]</sup> similar to the prevalence rate in China of 20%.<sup>[4]</sup> Observation studies showed that patients with NAFLD have a higher risk of developing extrahepatic complications such as cardiovascular disease, diabetes and metabolic syndrome.<sup>[5-7]</sup> Therefore, NAFLD is recognized as a global health burden and it is crucial to explore effective prevention and treatment strategies.

Physical activity as a lifestyle modification plays an important role in the development of

1  
2  
3  
4 NAFLD. Previous studies found an inverse relationship between physical activity and the risk of  
5  
6 NAFLD, [8-9] and randomized controlled trials also demonstrated that physical activity improved  
7  
8 liver enzyme function and reduced fat accumulation.<sup>[10-13]</sup> A meta-analysis of 20 RCTs showed  
9  
10 that levels of alanine aminotransferase (ALT), gamma-glutamyltranspeptidase (GGT), aspartate  
11  
12 aminotransferase (AST), and intrahepatic fat of the intervention group were significantly better  
13  
14 than the control group.<sup>[14]</sup> However, physical activity is a complex concept and includes type,  
15  
16 intensity, frequency and duration. Many studies only consider the frequency of physical activity,  
17  
18 and this does not reflect the dose. In addition, most studies had a limited sample size and the data  
19  
20 on physical activity was retrieved from populations with diverse demographic characteristics.  
21  
22 Therefore, the optimal intensity and dose of physical activity for the treatment of NAFLD have  
23  
24 yet to be found. For example, a report from the Korean suggested that exercising more than twice  
25  
26 a week and for more than 30 minutes can decrease the risk of hepatic steatosis.<sup>[15]</sup> Another study,  
27  
28 from America, found that moderate-intensity exercise might reduce the risk of hepatic steatosis,  
29  
30 but did not make a specific recommendation about the desired.<sup>[16]</sup>

31  
32  
33  
34  
35  
36  
37  
38  
39  
40 In the present study, Metabolic Equivalent of Energy (MET) was used as a measure of  
41  
42 physical activity. We aimed to explore the dose-response relationship between physical activity  
43  
44 and NAFLD in a Chinese population, taking into consideration confounding variables such as  
45  
46 energy intake and sedentary time.  
47  
48  
49  
50  
51  
52  
53  
54  
55  
56  
57  
58  
59  
60

---

## Methods

### Patient and Public Involvement

This study is a case-control design focused on a Chinese Han population between 18 and 70 years old. All subjects were recruited from a health examination center of Nanping First Affiliated Hospital of Fujian Medical University from October 2015 to September 2017. All subjects who participated in this study provided written informed consent and the study was approved by the local ethics committees of Fujian Medical University (ethics number 2014096). In addition, all methods were performed in accordance with the relevant guidelines and regulations.

### Eligibility of NAFLD cases and controls

NAFLD was diagnosed by the presence of at least two of the following three abnormal findings on abdominal ultrasonography:<sup>[17]</sup> (1) increased echogenicity of the liver near-field region with deep attenuation of the ultrasound signal; (2) hyperechogenicity of liver tissue (“bright liver”), as often compared to hypoechogenicity of the kidney cortex; and (3) vascular blurring. Exclusion criteria were as follows: (1) alcohol consumption >140 g/week for men and >70 g/week for women; (2) presence of hepatitis B surface antigen or hepatitis C antibodies; (3) use of hepatotoxic drugs (such as tamoxifen, amiodarone, valproate and methotrexate)<sup>[18]</sup> which can induce hepatic fat accumulation; (4) hepatic disease which can induce hepatic fat accumulation; (5) hepatic disease such as Wilson’s disease, autoimmune hepatitis and hemochromatosis. A total of 543 newly-diagnosed NAFLD patients were enrolled; and 543 controls were selected by frequency-matching according to age ( $\pm 5$  years) and gender from a healthy population who

underwent abdominal ultrasonography examination during the same period.

## **Survey content and variable definition**

### ***Data collection***

Face-to-face investigation was performed by uniformly trained investigators. Data were collected in the following four categories, using a structured questionnaire for the first two: demographic characteristics (age, gender, education, income and marriage status); health-related behaviors (smoking status, alcohol drinking, tea consumption, dietary habit, physical activity and sedentary time); anthropometric assessment (height, body weight and blood pressure) and biochemical examinations after a 12-hour overnight fast (AST, ALT, GGT, FBG, TC, TG, LDL and HDL).

### ***Energy intake assessment***

Total energy intake was assessed by semi-quantitative food frequency questionnaire (FFQ).<sup>[19]</sup> The FFQ was based on a similar questionnaire used in the 2010 China National Nutrition and Health Survey (CNNHS).<sup>[20]</sup> Participants were asked to estimate information on the average frequency of consumption of selected foods and the estimated portion size over the previous year, ignoring any recent changes. Intakes of food were converted into g per day. Each food item was assigned a specific energy according to Food Nutrition Facts Table and total energy intake was the sum of the energy of various foods ingested in a day.<sup>[21]</sup>

### ***Physical activity measurements***

Physical activity during the past seven days was quantified through a questionnaire based on the International Physical Activity Questionnaire, adapted to the characteristics of Nanping



1  
2  
3  
4 residents.<sup>[22]</sup> It includes four domains (transportation-related, work-related, household-related  
5  
6 and leisure time-related). Each domain includes specific activities which correspond to various  
7  
8 intensities of exercise (light-, moderate- and vigorous-intensity). Participants were asked to  
9  
10 estimate information on the frequency and duration spent in specific activities during the past  
11  
12 seven days. Sedentary time was measured by the single question, “During the past seven days,  
13  
14 how much time did you usually spend sitting on a day?”  
15  
16  
17

18  
19 The intensity of physical activity was defined in terms of Metabolic Equivalent of Energy  
20  
21 (MET). According to a standard reference, each kind of activity was assigned a specific MET  
22  
23 value: low-intensity physical activities were defined as <3METs, moderate-intensity activities  
24  
25 defined as 3~6 METs and vigorous-intensity activities defined as >6METs.<sup>[23]</sup> The dose of  
26  
27 specific physical activity was quantified by the frequency and duration and presented in the form  
28  
29 of MET-minutes per week (MET-min/week = duration X frequency per week X MET value). The  
30  
31 total dose of physical activity equals the sum of the doses for each specific activity.  
32  
33  
34  
35  
36

### 37 ***Definition of other variables***

38  
39  
40 Smokers were defined as those who had smoked at least one cigarette per day during the  
41  
42 previous six months. Tea consumption was defined as drinking one or more cups of tea per day  
43  
44 during the previous six months. Body mass index (BMI) was classified into two categories:  $\geq 24$   
45  
46  $\text{kg/m}^2$  and  $< 24 \text{ kg/m}^2$ .<sup>[24]</sup> For blood pressure measurement, participants were first asked to rest  
47  
48 for 10 min. Then, the trained investigators measured blood pressure twice on seated participants  
49  
50 using a standard mercury sphygmomanometer, and the mean of the two measurements was  
51  
52 considered as the participant’s blood pressure. Hypertension was defined as systolic arterial  
53  
54  
55  
56  
57  
58  
59

blood pressure(SABP)  $\geq 140$  mmHg or diastolic arterial blood pressure(DABP)  $\geq 90$  mmHg.<sup>[25]</sup>

### ***Blood sample collection***

Blood samples were collected between 8:00 and 10:00 a.m. after fasting overnight (12 h). Blood biochemical analysis was carried out by the medical laboratory department of Nanping First Affiliated Hospital of Fujian Medical University.

### **Statistical analysis**

The chi-square test was used to assess categorical variables and the Mann-Whitney U-test was used for continuous variables. An unconditional logistic regression model was employed to progressively reduce the confounding effect of the relationship between physical activity and NAFLD risk. The Kruskal-Wallis H test was conducted to explore the association between physical activity and biochemical parameters. All statistical analyses were conducted using SPSS 23.0. The P-value was defined as two-tailed and set at  $< 0.05$ .

### **Results**

A total of 1086 subjects (543 cases and 543 controls) were recruited. Baseline characteristics are shown in Table 1. Subjects with NAFLD tend to have a higher BMI, blood pressure, energy intake and tea consumption (each  $P < 0.05$ ); serum levels of GGT, ALT, AST, TC, TG, and FBG were also higher than in the control population (each  $P < 0.05$ ). Whereas HDL were lower in the cases ( $P < 0.05$ ). There was no difference in age, gender, income, marriage status, smoking status, education level, sedentary time or serum level of LDL between the two groups.

Table 1. Baseline characteristics of cases and controls

| Variable                    | case                          | control                       | Z/ $\chi^2$ | P              |
|-----------------------------|-------------------------------|-------------------------------|-------------|----------------|
|                             | Number(%)or median(quartiles) | Number(%)or median(quartiles) |             |                |
| Age (years)                 | 48 (39-54)                    | 48 (39-54)                    | -0.03       | 0.97           |
| Gender                      |                               |                               | <           | 1              |
| Male                        | 371 (68.3)                    | 371 (68.3)                    |             |                |
| Female                      | 172 (31.7)                    | 172 (31.7)                    |             |                |
| Blood pressure (mm/Hg)      |                               |                               | 20.60       | < <b>0.001</b> |
| <140/90                     | 380 (70.0)                    | 444 (81.8)                    |             |                |
| $\geq$ 140/90               | 163 (30.0)                    | 99 (18.2)                     |             |                |
| BMI (kg/m <sup>2</sup> )    |                               |                               | 189.5       | < <b>0.001</b> |
| <24                         | 182 (33.5)                    | 408 (75.1)                    |             |                |
| $\geq$ 24.00                | 361 (66.5)                    | 135 (24.9)                    |             |                |
| Education level             |                               |                               | 5.52        | 0.06           |
| Primary education           | 274 (50.5)                    | 286 (52.7)                    |             |                |
| Secondary education         | 158 (29.1)                    | 126 (23.2)                    |             |                |
| Bachelor degree             | 111 (20.4)                    | 131 (24.1)                    |             |                |
| Income (¥)                  |                               |                               | 1.44        | 0.49           |
| <1000                       | 33 (6.1)                      | 35 (6.4)                      |             |                |
| 1000~2000                   | 161 (29.7)                    | 178 (32.8)                    |             |                |
| $\geq$ 2000                 | 349 (64.3)                    | 330 (60.8)                    |             |                |
| Tea consumption             |                               |                               | 4.40        | <b>0.04</b>    |
| No                          | 338 (62.2)                    | 239 (44.0)                    |             |                |
| Yes                         | 205 (37.8)                    | 304 (56.0)                    |             |                |
| Smoking habit               |                               |                               | 0.24        | 0.62           |
| No                          | 140 (25.8)                    | 131 (24.1)                    |             |                |
| Yes                         | 403 (74.2)                    | 412 (75.9)                    |             |                |
| Marital status              |                               |                               | 2.65        | 0.10           |
| Single or divorced          | 53 (9.8)                      | 70 (12.9)                     |             |                |
| Married                     | 490 (90.2)                    | 473 (87.1)                    |             |                |
| Sedentary time (hours/day)  |                               |                               | 2.98        | 0.23           |
| <4                          | 167 (30.8)                    | 184 (33.9)                    |             |                |
| 4~8                         | 250 (46.0)                    | 255(47.0)                     |             |                |
| $\geq$ 8                    | 126 (23.2)                    | 104 (19.2)                    |             |                |
| Energy intake ( Kilojoule ) | 2227.34 (1778.78-2664.85)     | 2106.85(1696.41-2600.52)      | -2.32       | <b>0.02</b>    |
| GGT (IU/L)                  | 32(23.00-45.00)               | 23(17.00-32.00)               | -10.1       | < <b>0.001</b> |
| ALT (IU/L)                  | 27(20.00-38.00)               | 20(15.00-25.00)               | -11.4       | < <b>0.001</b> |
| AST (IU/L)                  | 24(20.00-28.00)               | 22(18.00-25.00)               | -5.69       | < <b>0.001</b> |
| TC (mmol/L)                 | 5.19 (4.64-5.77)              | 5.03(4.53-5.53)               | -2.76       | <b>0.06</b>    |
| TG (mmol/L)                 | 1.85 (1.29-2.54)              | 1.18(0.87-1.59)               | -13.4       | < <b>0.001</b> |
| FBG (mmol/L)                | 5.37 (5.03-5.84)              | 5.20(4.90-5.53)               | -6.16       | < <b>0.001</b> |
| HDL (mmol/L)                | 1.21 (1.06-1.37)              | 1.34(1.18-1.48)               | -9.16       | < <b>0.001</b> |
| LDL (mmol/L)                | 3.27 (2.63-3.79)              | 3.17(2.68-3.74)               | -0.61       | 0.54           |

AST=serum aspartate aminotransferase, ALT=alanine aminotransferase, GGT= gamma-glutamyltranspeptidase,FBG=serum fasting glucose, TC=total cholesterol, TG=triglycerides, LDL=low-density lipoprotein,HDL=high-density lipoprotein, BMI=body mass index

Multivariate logistic model 1, adjusted for age, gender, blood pressure, BMI and sedentary time, showed a significant inversely dose-dependent association between physical activity and NAFLD (>3943.8 MET-min/week vs.  $\leq 1620$  MET-min/week: OR= 0.69, 95% CI=0.48-0.98,  $P$  for trend= 0.04). After further adjusting for energy intake, this association was maintained (>3943.8 MET-min/week vs.  $\leq 1620$  MET-min/week: OR=0.66, 95% CI=0.46-0.94,  $P$  for trend=0.02, Table 2).

Table 2. Association between physical activity and NAFLD

| Variable<br>(MET-minute/week) | Case<br>number | Control<br>number(%) | Univariate model<br>OR (95% CI) | Multivariate model 1<br>aOR (95% CI) | Multivariate model 2<br>aOR (95% CI) | Multivariate model 3<br>aOR (95% CI) |
|-------------------------------|----------------|----------------------|---------------------------------|--------------------------------------|--------------------------------------|--------------------------------------|
| Total amount of               |                |                      |                                 |                                      |                                      |                                      |
| $\leq 1620$                   | 182 (33.5)     | 152 (28)             | 1 (reference)                   | 1 (reference)                        | 1 (reference)                        | 1 (reference)                        |
| ~3943.8                       | 180 (33.1)     | 200(36.8)            | 0.75(0.56-1.01)                 | <b>0.69 (0.49-0.96)</b>              | <b>0.68(0.49-0.95)</b>               | <b>0.69(0.49-0.96)</b>               |
| >3943.8                       | 181(33.3)      | 191(35.2)            | 0.79 (0.59-1.06)                | <b>0.69 (0.48-0.98)</b>              | <b>0.66(0.46-0.94)</b>               | <b>0.67(0.47-0.96)</b>               |
| $P$ value for trend           |                |                      | 0.13                            | <b>0.04</b>                          | <b>0.02</b>                          | <b>0.03</b>                          |
| Light intensity               |                |                      |                                 |                                      |                                      |                                      |
| $\leq 840$                    | 183 (33.7)     | 193 (35.5)           | 1 (reference)                   | 1 (reference)                        | 1 (reference)                        | 1 (reference)                        |
| ~2100                         | 185 (34.1)     | 196(36.1)            | 1.00 (0.75-1.32)                | 0.95(0.69-1.32)                      | 0.94 (0.68-1.30)                     | 0.95(0.68-1.31)                      |
| >2100                         | 175 (32.2)     | 154 (28.4)           | 1.20 (0.89-1.61)                | 1.20(0.83-1.72)                      | 1.15(0.80-1.65)                      | 1.18(0.82-1.69)                      |
| $P$ value for trend           |                |                      | 0.24                            | 0.35                                 | 0.46                                 | 0.39                                 |
| Moderate intensity            |                |                      |                                 |                                      |                                      |                                      |
| None                          | 223 (41.1)     | 193 (35.5)           | 1 (reference)                   | 1 (reference)                        | 1 (reference)                        | 1 (reference)                        |
| $\leq 840$                    | 163 (30.0)     | 163 (30.0)           | 0.87(0.65-1.16)                 | 0.79 (0.57-1.10)                     | 0.78 (0.56-1.08)                     | 0.79(0.56-1.09)                      |
| >840                          | 157 (28.9)     | 187 (34.4)           | <b>0.73 (0.55-0.97)</b>         | <b>0.69 (0.48-0.99)</b>              | <b>0.68 (0.47-0.96)</b>              | <b>0.69(0.48-0.98)</b>               |
| $P$ value for trend           |                |                      | <b>0.03</b>                     | <b>0.04</b>                          | <b>0.03</b>                          | <b>0.04</b>                          |
| Vigorous intensity            |                |                      |                                 |                                      |                                      |                                      |
| none                          | 432 (79.6)     | 400 (73.7)           | 1 (reference)                   | 1 (reference)                        | 1 (reference)                        | 1 (reference)                        |
| $\leq 960$                    | 32 (5.9)       | 46(8.5)              | 0.64 (0.40-1.03)                | 0.68 (0.40-1.15)                     | 0.68(0.40-1.15)                      | 0.69(0.41-1.16)                      |
| >960                          | 79 (14.5)      | 97 (17.9)            | <b>0.75 (0.54-1.05)</b>         | <b>0.67 (0.46-0.97)</b>              | <b>0.64 (0.44-0.94)</b>              | <b>0.65(0.44-0.94)</b>               |
| $P$ value for trend           |                |                      | <b>0.04</b>                     | <b>0.02</b>                          | <b>0.01</b>                          | <b>0.02</b>                          |

NAFLD: Non-alcoholic fatty liver disease

Multivariate model 1: adjusted for age, gender, BMI, blood pressure and sedentary time

Multivariate model 2: adjusted for age, gender, BMI, blood pressure and energy intake.

Multivariate model 3: adjusted for age, gender, BMI, blood pressure, sedentary time and energy intake.

ORs = odds ratios, aOR= adjusted odds ratios, CIs = confidence intervals

We further analyzed the association between various intensities of physical activity and the

risk of NAFLD. The moderate- and vigorous-intensity levels were inversely associated with the risk of NAFLD, independent of the confounding variables: (Moderate-intensity physical activity: >840 MET-min/week vs. none: OR=0.69, 95% CI=0.48-0.98, *P* for trend=0.04; Vigorous-intensity physical activity: >960 MET-min/week vs. none: OR=0.65, 95% CI=0.44-0.94, *P* for trend=0.02, Table 2).

When levels of activity were divided according to time, the dose-response association was shown: subjects who underwent moderate- or vigorous-intensity physical activity had a significantly lower risk of NAFLD (Moderate-intensity physical activity >3.5 hours vs. none: OR=0.67, 95% CI=0.47-0.96; *P* for trend=0.03; Vigorous-intensity physical activity >1.72 hours vs. none: OR=0.64, 95% CI= 0.45-0.90; *P* for trend=0.01, Table 3).

*Table 3. Association between moderate- or vigorous-intensity physical activity and NAFLD*

| Variable<br>(MET-minute/week) | Case<br>number | Control<br>number(%) | Univariate model<br>OR (95% CI) | Multivariate<br>aOR (95% CI) | Multivariate model 2<br>aOR (95% CI) | Multivariate model 3<br>aOR (95% CI) |
|-------------------------------|----------------|----------------------|---------------------------------|------------------------------|--------------------------------------|--------------------------------------|
| <b>Moderate intensity</b>     |                |                      |                                 |                              |                                      |                                      |
| None                          | 223(41.1)      | 193 (35.5)           | 1 (reference)                   | 1 (reference)                | 1 (reference)                        | 1 (reference)                        |
| ~3.5 hours                    | 166 (30.6)     | 164(30.2)            | 0.79 (0.41-1.52)                | 0.81 (0.58-1.12)             | 0.79 (0.57-1.10)                     | 0.80(0.57-1.11)                      |
| >3.5 hours                    | 154 (28.4)     | 186(34.3)            | <b>0.71 (0.52-0.96)</b>         | <b>0.67 (0.47-0.96)</b>      | <b>0.66(0.46-0.94)</b>               | <b>0.67(0.47-0.96)</b>               |
| <i>P</i> value for trend      |                |                      | <b>0.02</b>                     | <b>0.03</b>                  | <b>0.02</b>                          | <b>0.03</b>                          |
| <b>Vigorous intensity</b>     |                |                      |                                 |                              |                                      |                                      |
| None                          | 432 (76.6)     | 400 (73.7)           | 1 (reference)                   | 1 (reference)                | 1 (reference)                        | 1 (reference)                        |
| ~1.72 hours                   | 17(3.4)        | 20 (3.7)             | 0.88 (0.66-1.17)                | 0.79 (0.38-1.64)             | 0.79 (0.38-1.65)                     | 0.80(0.39-1.67)                      |
| >1.72 hours                   | 94 (20)        | 123 (22.7)           | <b>0.72 (0.54-0.96)</b>         | <b>0.65 (0.46-0.92)</b>      | <b>0.63 (0.45-0.90)</b>              | <b>0.64(0.45-0.90)</b>               |
| <i>P</i> value for trend      |                |                      | <b>0.02</b>                     | <b>0.02</b>                  | <b>0.01</b>                          | <b>0.01</b>                          |

NAFLD: Non-alcoholic fatty liver disease

Multivariate model 1: adjusted for age, gender, BMI, blood pressure and sedentary time

Multivariate model 2: adjusted for age, gender, BMI, blood pressure and energy intake.

Multivariate model 3: adjusted for age, gender, BMI, blood pressure, sedentary time and energy intake.

ORs = odds ratios, aOR= adjusted odds ratios, CIs = confidence intervals

We explored the association between physical activity and biochemical indicators. In

NAFLD patients, subjects who undergo a higher total amount of physical activity tend to have significantly lower levels of GGT, ALT, FBG ( $P<0.05$ ). In the control population, greater physical activity was significantly associated with greater HDL and LDL ( $P<0.05$ ). (Table 4).

*Table 4. Association between total amount of physical activity and biochemical indicators*

| Physical activity (MET-minute/week) | Case<br>median (quartiles) |                  |                  | <i>P</i>          |
|-------------------------------------|----------------------------|------------------|------------------|-------------------|
|                                     | ≤1620                      | 1620~3943.8      | >3943.8          |                   |
| <b>biochemical indicators</b>       |                            |                  |                  |                   |
| GGT (IU/L)                          | 38.00(26.75-53)            | 30 (23.00-42.00) | 28(20.00-33.50)  | <b>&lt; 0.001</b> |
| ALT (IU/L)                          | 31(23.00-41.25)            | 27 (19.00-36.00) | 25(18.00-34.00)  | <b>&lt; 0.001</b> |
| AST (IU/L)                          | 24(20.00-30.00)            | 22 (19.00-27.00) | 23(20.00-28.5)   | 0.15              |
| TC (mmol/L)                         | 5.16(4.44-5.74)            | 5.22 (4.67-5.84) | 5.16(4.67-5.72)  | 0.42              |
| TG (mmol/L)                         | 1.92(1.41-2.69)            | 1.91(1.26-2.57)  | 1.77(1.22-2.36)  | 0.16              |
| FBG (mmol/L)                        | 5.55 (5.06-6.05)           | 5.36(5.02-5.80)  | 5.28(5.01-5.70)  | <b>0.02</b>       |
| HDL (mmol/L)                        | 1.17(1.03-1.33)            | 1.21(1.06-1.37)  | 1.24(1.07-1.38)  | 0.09              |
| LDL (mmol/L)                        | 3.24 (2.53-3.70)           | 3.32(2.69-3.96)  | 3.31(2.58-3.78)  | 0.29              |
| <b>Control</b>                      |                            |                  |                  |                   |
| Physical activity (MET-minute/week) | median (quartiles)         |                  |                  | <i>P</i>          |
|                                     | ≤1620                      | 1620~3943.8      | >3943.8          |                   |
| <b>biochemical indicators</b>       |                            |                  |                  |                   |
| GGT (IU/L)                          | 23 (18.00-32.00)           | 23(17.00-32.00)  | 21(15.00-30.00)  | 0.12              |
| ALT (IU/L)                          | 20 (15.00-24.75)           | 19 (15.00-26.75) | 20 (15.00-25.00) | 0.97              |
| AST (IU/L)                          | 20.5 (18.00-23.00)         | 22(18.00-25.00)  | 22(18.00-25.00)  | <b>0.04</b>       |
| TC (mmol/L)                         | 4.98 (4.46-5.33)           | 4.46(5.01-5.45)  | 5.11(4.64-5.84)  | <b>0.02</b>       |
| TG (mmol/L)                         | 1.27 (0.91-1.54)           | 1.15(0.89-1.66)  | 1.11(0.83-1.59)  | 0.45              |
| FBG (mmol/L)                        | 5.20 (4.89-5.54)           | 5.24(4.91-5.55)  | 5.18(4.89-5.46)  | 0.71              |
| HDL (mmol/L)                        | 1.32(1.14-1.45)            | 1.34(1.18-1.48)  | 1.39(1.21-1.48)  | <b>0.02</b>       |
| LDL (mmol/L)                        | 3.09 (2.67-3.61)           | 3.14(2.60-3.70)  | 3.33(2.76-3.80)  | <b>0.04</b>       |

AST = serum aspartate aminotransferase, ALT = alanine aminotransferase, GGT = gamma-glutamyltranspeptidase, FBG = serum fasting glucose, TC = total cholesterol, TG = triglycerides, LDL = low-density lipoprotein, HDL = high-density lipoprotein

## Discussion

Physical activity is a complex concept including type, intensity, frequency and duration. The parameters used to define the intensity of physical activity fall into two categories: absolute or relative. Absolute intensity refers to the rate of energy expenditure during physical activity and is usually presented as Metabolic Equivalent of Energy (MET). MET is a widely-used

1  
2  
3  
4 physiological concept defined as the ratio of work metabolic rate to a standard resting metabolic  
5  
6 rate of 1Kcal/kg·h (1 MET=3.5ml O<sub>2</sub>/kg·min=1Kcal/kg·h).<sup>[26]</sup> Moderate-intensity physical  
7  
8 activity corresponds to 40%~60% of VO<sub>2</sub> max or 4~6 METs. Vigorous-intensity physical activity  
9  
10 corresponds to ≥60% of VO<sub>2</sub> max or > 6METs.<sup>[27]</sup> Since different methods are used to assess  
11  
12 physical activity in the literature, the optimal intensity and dose of physical activity for the  
13  
14 treatment of NAFLD have yet to be determined.  
15  
16  
17

18  
19 In the present study, the intensity of physical activity was measured in terms of MET; and  
20  
21 dose of physical activity was presented in the form of MET-min/week. We observed an inverse  
22  
23 dose-response association between physical activity and the risk of NAFLD, independent of  
24  
25 potential confounding variables. Subjects with more than 3943.8MET-min/week total physical  
26  
27 activity had a 33% lower risk of NAFLD compared to those with less than 1620 MET-min/week.  
28  
29 In addition, we also found that moderate- and vigorous-intensity physical activity were beneficial  
30  
31 to NAFLD. When the dose of physical activity was divided according to time, the dose-response  
32  
33 association was maintained. Several studies using maximal heart rate or percentage of VO<sub>2</sub> max  
34  
35 to define the intensity of physical activity indirectly supported our findings. One other  
36  
37 cross-sectional study has also found a dose-response association between physical activity and  
38  
39 NAFLD risk in terms of MET.<sup>[28]</sup> This study suggested that males with a dose of more than 5760  
40  
41 MET-min/week had a 31% lower risk of NAFLD compared to those with less than 498  
42  
43 MET-min/week. In females, the association was weaker. The Physical Activity Guidelines for  
44  
45 Americans (PAGA) released by the USDHHS<sup>[29]</sup> suggested that more than 150 minutes of  
46  
47 moderate-intensity physical activity per week or 60 minutes of vigorous-intensity physical  
48  
49  
50  
51  
52  
53  
54  
55  
56  
57  
58  
59  
60

1  
2  
3  
4 activity per week is beneficial to health. However, the study population was heterogeneous,  
5  
6 meaning that the results should be interpreted with caution and that optimal dose of physical  
7  
8 activity should be tailored to the patient's clinical characteristics, fitness status and preferences.  
9

10  
11 The mechanism by which physical activity improves NAFLD is unclear, although several  
12  
13 potential mechanisms have been suggested. First, insulin sensitivity is a plausible explanation,<sup>[30]</sup>  
14  
15 via increasing expression of glucose transport protein and synthase activity of muscle glycogen,  
16  
17 and decreasing the accumulation of serum triglyceride. Secondly, physical activity decreases  
18  
19 visceral adiposity, which in turn decreases free fatty acid influx to the liver. Thirdly, physical  
20  
21 activity is known to upregulate the intake of glucose and lipid oxidation in skeletal muscle,  
22  
23 which in turn depletes the accumulation of fatty acid in the liver.<sup>[31]</sup> In the present study, we  
24  
25 observed that increased physical activity was associated with decreased FBG levels in NAFLD  
26  
27 patients, and subjects with higher physical activity tend to have higher HDL levels in controls.  
28  
29 Nevertheless, more studies are still needed to confirm the association between physical activity  
30  
31 and NAFLD and potential mechanisms should be explored.  
32  
33  
34  
35  
36  
37  
38  
39

#### 40 *Strengths and limitations*

41  
42 There were several advantages to the current study. First, several potential confounding  
43  
44 variables, including energy intake and sedentary time, were taken into account. With the  
45  
46 development of technology and a better economy, people tend to spend more time in sedentary  
47  
48 activities: one study showed that sitting time was positively associated with risk of NAFLD,  
49  
50 even in subjects with a high level of physical activity.<sup>[32]</sup> Similarly, another study indicated that  
51  
52 regular participation in high levels of physical activity does not fully protect against the risks  
53  
54  
55  
56  
57  
58  
59  
60



1  
2  
3  
4 associated with prolonged bouts of sedentary behaviors.<sup>[33]</sup> Other known risk factors of NAFLD  
5  
6 are energy intake and BMI. Several previous studies have found that NAFLD patients tend to  
7  
8 have higher energy intake, and a restricted-energy diet was found to have great benefits for  
9  
10 weight loss and improving BMI.<sup>[34-37]</sup> However, few studies have considered sedentary time and  
11  
12 energy intake at the same time when investigating the association between physical activity and  
13  
14 NAFLD. The potential confounding effect of these factors may reduce the power to detect  
15  
16 associations between physical activity and the risk of NAFLD.  
17  
18  
19  
20  
21

22 A second advantage to our study was that we used the well-known parameter MET to  
23  
24 quantify the intensity of physical activity; and also quantified dose of physical activity as  
25  
26 frequency and duration. We found a dose–response association between physical activity and risk  
27  
28 of NAFLD, which could provide evidence for a clinical treatment guideline for NAFLD.  
29  
30  
31

32 A third advantage was that this study had a considerable sample size and could thus provide  
33  
34 substantial statistical power to assess the effect of physical activity on NAFLD.  
35  
36  
37

38 However, several limitations should be considered. First, this study was a case-control  
39  
40 design, thus the causal association between physical activity and NAFLD could not be precisely  
41  
42 identified. Second, the level of physical activity was self-reported: subjects often have difficulty  
43  
44 in recalling physical activity undertaken in the past seven days and tend to underestimate the  
45  
46 time spent in specific activities. Therefore, misclassification bias was inevitable and could have  
47  
48 affected the calculated association between physical activity and NAFLD. Randomized  
49  
50 controlled trial studies are therefore required for more accurate results.  
51  
52  
53  
54  
55  
56  
57  
58  
59  
60

## Conclusions

the present study found that high physical activity was inversely associated with the risk of NAFLD in a dose-dependent manner, with moderate- and vigorous-intensity physical activity having the greatest effect on reducing risk.

## Acknowledgement

We thank all study participants for their cooperation. We also thank our staff for recruiting subjects and their technical assistance.

## Conflict of interests, and authorship

The authors declare that they have no conflicts of interest.

## Data sharing

No additional data are available.

## Source of funding

This work was supported by the National Natural Science Foundation of China [grant number 81473047], the Training Program Foundation for Middle-aged and Young Talents from Sanitation System of Fujian Province [grant number 2014-ZQN-ZD-23], and the Joint Innovation Project of Science and Technology of Fujian Province [grant number 2017Y9104].

## References

1. Torres DM, Williams CD, Harrison SA. Features, diagnosis, and treatment of nonalcoholic fatty liver disease. *Clin Gastroenterol Hepatol* 2012;10(8):837-58. doi: 10.1016/j.cgh.2012.03.011
2. Rinella ME. Nonalcoholic fatty liver disease: a systematic review. *JAMA*

- 
- 2015;313(22):2263-73. doi: 10.1001/jama.2015.5370
3. Younossi Z, Koenig A, Abdelatif D, et al. Global epidemiology of nonalcoholic fatty liver disease-Meta-analytic assessment of prevalence, incidence, and outcomes. *Hepatology* 2016;64(1):73-84.
  4. Li Z, Xue J, Chen P, et al. Prevalence of nonalcoholic fatty liver disease in mainland of China: a meta-analysis of published studies. *J Gastroenterol Hepatol* 2014;29(1):42-51. doi: 10.1111/jgh.12428
  5. Motamed N, Rabiee B, Poustchi H, et al. Non-alcoholic fatty liver disease (NAFLD) and 10-year risk of cardiovascular diseases. *Clin Res Hepatol Gastroenterol* 2017;41(1):31-38. doi: 10.1016/j.clinre.2016.07.005
  6. Gaggini M, Morelli M, Buzzigoli E, et al. Non-Alcoholic Fatty Liver Disease (NAFLD) and Its Connection with Insulin Resistance, Dyslipidemia, Atherosclerosis and Coronary Heart Disease. *Nutrients* 2013;5(5):1544-60. doi: 10.3390/nu5051544
  7. Ortiz-Lopez C, Lomonaco R, Orsak B, et al. Prevalence of prediabetes and diabetes and metabolic profile of patients with nonalcoholic fatty liver disease (NAFLD). *Diabetes Care* 2012;35(4):873-8. doi: 10.2337/dc11-1849
  8. Miele L, Dall'armi V, Cefalo C, et al. A case-control study on the effect of metabolic gene polymorphisms, nutrition, and their interaction on the risk of non-alcoholic fatty liver disease. *Genes Nutr* 2014;9(2):383. doi: 10.1007/s12263-013-0383-1
  9. Katsagoni C, Georgoulis M, Papatheodoridis G, et al. Associations Between Lifestyle Characteristics and the Presence of Nonalcoholic Fatty Liver Disease: A Case-Control Study.

- 
- Metabolic syndrome and related disorders* 2017;15(2):72-79.
10. Houghton D, Thoma C, Hallsworth K, et al. Exercise Reduces Liver Lipids and Visceral Adiposity in Patients With Nonalcoholic Steatohepatitis in a Randomized Controlled Trial. *Clin Gastroenterol Hepatol* 2017;15(1):96-102 e3. doi: 10.1016/j.cgh.2016.07.031
11. Zhang HJ, Pan LL, Ma ZM, et al. Long-term effect of exercise on improving fatty liver and cardiovascular risk factors in obese adults: A 1-year follow-up study. *Diabetes Obes Metab* 2017;19(2):284-89. doi: 10.1111/dom.12809
12. Sullivan S, Kirk E, Mittendorfer B, et al. Randomized trial of exercise effect on intrahepatic triglyceride content and lipid kinetics in nonalcoholic fatty liver disease. *Hepatology* 2012;55(6):1738-45.
13. Hallsworth K, Thoma C, Hollingsworth K, et al. Modified high-intensity interval training reduces liver fat and improves cardiac function in non-alcoholic fatty liver disease: a randomized controlled trial. *Clin Sci* 2015;129(12):1097-105.
14. Katsagoni CN, Georgoulis M, Papatheodoridis GV, et al. Effects of lifestyle interventions on clinical characteristics of patients with non-alcoholic fatty liver disease: A meta-analysis. *Metabolism* 2017;68:119-32. doi: 10.1016/j.metabol.2016.12.006
15. Korean Association for the Study of the L. KASL clinical practice guidelines: management of nonalcoholic fatty liver disease. *Clin Mol Hepatol* 2013;19(4):325-48. doi: 10.3350/cmh.2013.19.4.325
16. Chalasani N, Younossi Z, Lavine JE, et al. The diagnosis and management of non-alcoholic fatty liver disease: Practice guideline by the American Association for the Study of Liver

- Diseases, American College of Gastroenterology, and the American Gastroenterological Association. *Am J Gastroenterol* 2012;107(6):811-26. doi: 10.1038/ajg.2012.128
17. Farrell G, Chitturi S, Lau G, et al. Guidelines for the assessment and management of non-alcoholic fatty liver disease in the Asia-Pacific region: executive summary. *J Gastroenterol Hepatol* 2007;22(6):775-7.
18. Amacher DE, Chalasani N. Drug-induced hepatic steatosis. *Seminars in Liver Disease* 2014;34(02):205-14.
19. Shahar D, Shai I, Vardi H, et al. Development of a semi-quantitative Food Frequency Questionnaire (FFQ) to assess dietary intake of multiethnic populations. *Eur J Epidemiol* 2003;18(9):855-61.
20. Li L, Rao K, Kong L, et al. [A description on the Chinese national nutrition and health survey in 2002]. *Zhonghua Liu Xing Bing Xue Za Zhi* 2005;26(7):478-84.
21. Yuexin Y, Guang W, Xingchang P. *China food composition*. Peking University Medical Press 2009:1-360
22. Craig CL, Marshall AL, Sjostrom M, et al. International physical activity questionnaire: 12-country reliability and validity. *Med Sci Sports Exerc* 2003;35(8):1381-95. doi: 10.1249/01.MSS.0000078924.61453.FB
23. Ainsworth B, Haskell W, Herrmann S, et al. 2011 Compendium of Physical Activities: a second update of codes and MET values. *Med Sci Sports Exerc* 2011;43(8):1575-81.
24. He Y, Jiang B, Wang J, et al. BMI versus the metabolic syndrome in relation to cardiovascular risk in elderly Chinese individuals. *Diabetes Care* 2007;30(8):2128-34.

- 
- 1  
2  
3  
4 25. Chalmers J, Macmahon S, Mancia G, et al. Chalmers J, MacMahon S, Mancia G, et al. World  
5  
6 Health Organization-International Society of Hypertension Guidelines for the management  
7  
8 of hypertension. Guidelines Sub-Committee of the World Health Organization. *Clinical &*  
9  
10 *Experimental Hypertension* 1999;21(5-6):1009-60.  
11  
12
- 13  
14 26. Ekelund U, Poortvliet E, Yngve A, et al. Heart rate as an indicator of the intensity of physical  
15  
16 activity in human adolescents. *Eur J Appl Physiol* 2001;85(3-4):244-9. doi:  
17  
18 10.1007/s004210100436  
19  
20
- 21  
22 27. Fletcher GF, Ades PA, Kligfield P, et al. Exercise standards for testing and training: a  
23  
24 scientific statement from the American Heart Association. *Circulation* 2013;128(8):873-934.  
25  
26 doi: 10.1161/CIR.0b013e31829b5b44  
27  
28
- 29  
30 28. Kwak MS, Kim D, Chung GE, et al. Role of physical activity in nonalcoholic fatty liver  
31  
32 disease in terms of visceral obesity and insulin resistance. *Liver Int* 2015;35(3):944-52. doi:  
33  
34 10.1111/liv.12552  
35  
36
- 37  
38 29. Tucker J, Welk G, Beyler N. Physical activity in U.S.: adults compliance with the Physical  
39  
40 Activity Guidelines for Americans. *Am J Prev Med* 2011;40(4):454-61.  
41  
42
- 43  
44 30. Winn NC, Liu Y, Rector RS, et al. Energy-matched moderate and high intensity exercise  
45  
46 training improves nonalcoholic fatty liver disease risk independent of changes in body mass  
47  
48 or abdominal adiposity - A randomized trial. *Metabolism* 2018;78:128-40. doi:  
49  
50 10.1016/j.metabol.2017.08.012  
51  
52
- 53  
54 31. Zhang HJ, He J, Pan LL, et al. Effects of Moderate and Vigorous Exercise on Nonalcoholic  
55  
56 Fatty Liver Disease: A Randomized Clinical Trial. *JAMA Intern Med* 2016;176(8):1074-82.  
57  
58  
59  
60

- 1  
2  
3  
4 doi: 10.1001/jamainternmed.2016.3202  
5  
6  
7 32. Ryu S, Chang Y, Jung HS, et al. Relationship of sitting time and physical activity with  
8  
9 non-alcoholic fatty liver disease. *J Hepatol* 2015;63(5):1229-37. doi:  
10  
11 10.1016/j.jhep.2015.07.010  
12  
13  
14 33. Matthews CE, George SM, Moore SC, et al. Amount of time spent in sedentary behaviors  
15  
16 and cause-specific mortality in US adults. *Am J Clin Nutr* 2012;95(2):437-45. doi:  
17  
18 10.3945/ajcn.111.019620  
19  
20  
21  
22 34. Cheng Y, Zhang K, Chen Y, et al. Associations between Dietary Nutrient Intakes and Hepatic  
23  
24 Lipid Contents in NAFLD Patients Quantified by <sup>1</sup>H-MRS and Dual-Echo MRI. *Nutrients*  
25  
26 2016;8(9)  
27  
28  
29  
30 35. Gonzalez C, de Ledinghen V, Vergniol J, et al. Hepatic Steatosis, Carbohydrate Intake, and  
31  
32 Food Quotient in Patients with NAFLD. *Int J Endocrinol* 2013;2013:428542.  
33  
34  
35 36. Golbidi S, Daiber A, Korac B, et al. Health Benefits of Fasting and Caloric Restriction. *Curr*  
36  
37 *Diab Rep* 2017;17(12):123. doi: 10.1007/s11892-017-0951-7  
38  
39  
40 37. Hashemi Kani A, Alavian S, Esmailzadeh A, et al. Dietary Quality Indices and Biochemical  
41  
42 Parameters Among Patients With Non Alcoholic Fatty Liver Disease (NAFLD). *Hepat Mon*  
43  
44 2013;13(7):e10943.  
45  
46  
47  
48  
49  
50  
51  
52  
53  
54  
55  
56  
57  
58  
59  
60

## Contributorship statement

All authors included on a paper fulfil the criteria of authorship. There is no one else who fulfils the criteria that has been excluded as an author.

**YangFan Li:** Writing original draft and Investigation

**Fei He:** Writing review & editing and Conceptualization

**Yun He:** Investigation and Supervision

**XinTing Pan:** Investigation and Supervision

**ZhiJian Hu:** Formal analysis and Software

**Xu Lin:** Agreement to be accountable for all aspects of the work in ensuring that questions related to the accuracy or integrity of any part of the work are appropriately investigated and resolved.

**ShangHua Xu:** Agreement to be accountable for all aspects of the work in ensuring that questions related to the accuracy or integrity of any part of the work are appropriately investigated and resolved.

**XianE Peng:** Final approval of the version published. Substantial contributions to the conception or design of the work, or the acquisition, analysis or interpretation of data.

We thank all study participants for their cooperation. We also thank our staff for recruiting subjects and their technical assistance.



STROBE Statement—Checklist of items that should be included in reports of *case-control studies*

|                              | Item No | Recommendation                                                                                                                                                                                    | Page No |
|------------------------------|---------|---------------------------------------------------------------------------------------------------------------------------------------------------------------------------------------------------|---------|
| <b>Title and abstract</b>    | 1       | (a) Indicate the study's design with a commonly used term in the title or the abstract                                                                                                            | 1       |
|                              |         | (b) Provide in the abstract an informative and balanced summary of what was done and what was found                                                                                               | 2       |
| <b>Introduction</b>          |         |                                                                                                                                                                                                   |         |
| Background/rationale         | 2       | Explain the scientific background and rationale for the investigation being reported                                                                                                              | 3       |
| Objectives                   | 3       | State specific objectives, including any prespecified hypotheses                                                                                                                                  | 4       |
| <b>Methods</b>               |         |                                                                                                                                                                                                   |         |
| Study design                 | 4       | Present key elements of study design early in the paper                                                                                                                                           | 5       |
| Setting                      | 5       | Describe the setting, locations, and relevant dates, including periods of recruitment, exposure, follow-up, and data collection                                                                   | 5       |
| Participants                 | 6       | (a) Give the eligibility criteria, and the sources and methods of case ascertainment and control selection. Give the rationale for the choice of cases and controls                               | 5       |
|                              |         | (b) For matched studies, give matching criteria and the number of controls per case                                                                                                               | 5       |
| Variables                    | 7       | Clearly define all outcomes, exposures, predictors, potential confounders, and effect modifiers. Give diagnostic criteria, if applicable                                                          | 6-8     |
| Data sources/<br>measurement | 8*      | For each variable of interest, give sources of data and details of methods of assessment (measurement). Describe comparability of assessment methods if there is more than one group              | 5-8     |
| Bias                         | 9       | Describe any efforts to address potential sources of bias                                                                                                                                         |         |
| Study size                   | 10      | Explain how the study size was arrived at                                                                                                                                                         |         |
| Quantitative<br>variables    | 11      | Explain how quantitative variables were handled in the analyses. If applicable, describe which groupings were chosen and why                                                                      |         |
| Statistical methods          | 12      | (a) Describe all statistical methods, including those used to control for confounding                                                                                                             | 8       |
|                              |         | (b) Describe any methods used to examine subgroups and interactions                                                                                                                               | 8       |
|                              |         | (c) Explain how missing data were addressed                                                                                                                                                       |         |
|                              |         | (d) If applicable, explain how matching of cases and controls was addressed                                                                                                                       | 5       |
|                              |         | (e) Describe any sensitivity analyses                                                                                                                                                             |         |
| <b>Results</b>               |         |                                                                                                                                                                                                   |         |
| Participants                 | 13*     | (a) Report numbers of individuals at each stage of study—eg numbers potentially eligible, examined for eligibility, confirmed eligible, included in the study, completing follow-up, and analysed | 5       |
|                              |         | (b) Give reasons for non-participation at each stage                                                                                                                                              |         |
|                              |         | (c) Consider use of a flow diagram                                                                                                                                                                |         |
| Descriptive data             | 14*     | (a) Give characteristics of study participants (eg demographic, clinical, social) and information on exposures and potential confounders                                                          | 9       |
|                              |         | (b) Indicate number of participants with missing data for each variable of interest                                                                                                               |         |
| Outcome data                 | 15*     | Report numbers in each exposure category, or summary measures of exposure                                                                                                                         |         |

|    |                          |    |                                                                                                                                                                                                              |
|----|--------------------------|----|--------------------------------------------------------------------------------------------------------------------------------------------------------------------------------------------------------------|
| 1  |                          |    |                                                                                                                                                                                                              |
| 2  |                          |    |                                                                                                                                                                                                              |
| 3  | Main results             | 16 | (a) Give unadjusted estimates and, if applicable, confounder-adjusted estimates and their precision (eg, 95% confidence interval). Make clear which confounders were adjusted for and why they were included |
| 4  |                          |    |                                                                                                                                                                                                              |
| 5  |                          |    |                                                                                                                                                                                                              |
| 6  |                          |    |                                                                                                                                                                                                              |
| 7  |                          |    | (b) Report category boundaries when continuous variables were categorized                                                                                                                                    |
| 8  |                          |    | (c) If relevant, consider translating estimates of relative risk into absolute risk for a meaningful time period                                                                                             |
| 9  |                          |    |                                                                                                                                                                                                              |
| 10 | Other analyses           | 17 | Report other analyses done—eg analyses of subgroups and interactions, and sensitivity analyses                                                                                                               |
| 11 |                          |    |                                                                                                                                                                                                              |
| 12 |                          |    |                                                                                                                                                                                                              |
| 13 |                          |    |                                                                                                                                                                                                              |
| 14 | <b>Discussion</b>        |    |                                                                                                                                                                                                              |
| 15 | Key results              | 18 | Summarise key results with reference to study objectives                                                                                                                                                     |
| 16 |                          |    |                                                                                                                                                                                                              |
| 17 | Limitations              | 19 | Discuss limitations of the study, taking into account sources of potential bias or imprecision. Discuss both direction and magnitude of any potential bias                                                   |
| 18 |                          |    |                                                                                                                                                                                                              |
| 19 | Interpretation           | 20 | Give a cautious overall interpretation of results considering objectives, limitations, multiplicity of analyses, results from similar studies, and other relevant evidence                                   |
| 20 |                          |    |                                                                                                                                                                                                              |
| 21 | Generalisability         | 21 | Discuss the generalisability (external validity) of the study results                                                                                                                                        |
| 22 |                          |    |                                                                                                                                                                                                              |
| 23 | <b>Other information</b> |    |                                                                                                                                                                                                              |
| 24 | Funding                  | 22 | Give the source of funding and the role of the funders for the present study and, if applicable, for the original study on which the present article is based                                                |
| 25 |                          |    |                                                                                                                                                                                                              |
| 26 |                          |    |                                                                                                                                                                                                              |
| 27 |                          |    |                                                                                                                                                                                                              |
| 28 |                          |    |                                                                                                                                                                                                              |
| 29 |                          |    |                                                                                                                                                                                                              |
| 30 |                          |    |                                                                                                                                                                                                              |
| 31 |                          |    |                                                                                                                                                                                                              |
| 32 |                          |    |                                                                                                                                                                                                              |
| 33 |                          |    |                                                                                                                                                                                                              |
| 34 |                          |    |                                                                                                                                                                                                              |
| 35 |                          |    |                                                                                                                                                                                                              |
| 36 |                          |    |                                                                                                                                                                                                              |
| 37 |                          |    |                                                                                                                                                                                                              |
| 38 |                          |    |                                                                                                                                                                                                              |
| 39 |                          |    |                                                                                                                                                                                                              |
| 40 |                          |    |                                                                                                                                                                                                              |
| 41 |                          |    |                                                                                                                                                                                                              |
| 42 |                          |    |                                                                                                                                                                                                              |
| 43 |                          |    |                                                                                                                                                                                                              |
| 44 |                          |    |                                                                                                                                                                                                              |
| 45 |                          |    |                                                                                                                                                                                                              |
| 46 |                          |    |                                                                                                                                                                                                              |
| 47 |                          |    |                                                                                                                                                                                                              |
| 48 |                          |    |                                                                                                                                                                                                              |
| 49 |                          |    |                                                                                                                                                                                                              |
| 50 |                          |    |                                                                                                                                                                                                              |
| 51 |                          |    |                                                                                                                                                                                                              |
| 52 |                          |    |                                                                                                                                                                                                              |
| 53 |                          |    |                                                                                                                                                                                                              |
| 54 |                          |    |                                                                                                                                                                                                              |
| 55 |                          |    |                                                                                                                                                                                                              |
| 56 |                          |    |                                                                                                                                                                                                              |
| 57 |                          |    |                                                                                                                                                                                                              |
| 58 |                          |    |                                                                                                                                                                                                              |
| 59 |                          |    |                                                                                                                                                                                                              |
| 60 |                          |    |                                                                                                                                                                                                              |

\*Give information separately for cases and controls.

**Note:** An Explanation and Elaboration article discusses each checklist item and gives methodological background and published examples of transparent reporting. The STROBE checklist is best used in conjunction with this article (freely available on the Web sites of PLoS Medicine at <http://www.plosmedicine.org/>, Annals of Internal Medicine at <http://www.annals.org/>, and Epidemiology at <http://www.epidem.com/>). Information on the STROBE Initiative is available at <http://www.strobe-statement.org>.

# BMJ Open

## The dose-response association between physical activity and non-alcoholic fatty liver disease: a case-control study in a Chinese population

|                                 |                                                                                                                                                                                                                                                                                                                                                                                                                                                                                                                                                                                                                                                                                                                                                                                                                                                                                                                                                                                                                                                                                                                                                                                                                                                                                                                                                                                                                                                                                                                                                                       |
|---------------------------------|-----------------------------------------------------------------------------------------------------------------------------------------------------------------------------------------------------------------------------------------------------------------------------------------------------------------------------------------------------------------------------------------------------------------------------------------------------------------------------------------------------------------------------------------------------------------------------------------------------------------------------------------------------------------------------------------------------------------------------------------------------------------------------------------------------------------------------------------------------------------------------------------------------------------------------------------------------------------------------------------------------------------------------------------------------------------------------------------------------------------------------------------------------------------------------------------------------------------------------------------------------------------------------------------------------------------------------------------------------------------------------------------------------------------------------------------------------------------------------------------------------------------------------------------------------------------------|
| Journal:                        | <i>BMJ Open</i>                                                                                                                                                                                                                                                                                                                                                                                                                                                                                                                                                                                                                                                                                                                                                                                                                                                                                                                                                                                                                                                                                                                                                                                                                                                                                                                                                                                                                                                                                                                                                       |
| Manuscript ID                   | bmjopen-2018-026854.R1                                                                                                                                                                                                                                                                                                                                                                                                                                                                                                                                                                                                                                                                                                                                                                                                                                                                                                                                                                                                                                                                                                                                                                                                                                                                                                                                                                                                                                                                                                                                                |
| Article Type:                   | Research                                                                                                                                                                                                                                                                                                                                                                                                                                                                                                                                                                                                                                                                                                                                                                                                                                                                                                                                                                                                                                                                                                                                                                                                                                                                                                                                                                                                                                                                                                                                                              |
| Date Submitted by the Author:   | 04-Jan-2019                                                                                                                                                                                                                                                                                                                                                                                                                                                                                                                                                                                                                                                                                                                                                                                                                                                                                                                                                                                                                                                                                                                                                                                                                                                                                                                                                                                                                                                                                                                                                           |
| Complete List of Authors:       | li, yangfan; Department of Epidemiology and Health Statistics, Fujian Provincial Key Laboratory of Environment Factors and Cancer, School of Public Health, Fujian Medical University, Fujian, China<br>He, Fei; Department of Epidemiology and Health Statistics, Fujian Provincial Key Laboratory of Environment Factors and Cancer, School of Public Health, Fujian Medical University, Fujian, China<br>he, yun; Key Laboratory of Ministry of Education for Gastrointestinal Cancer, Fujian Medical University, Fujian, China<br>pan, xinting; Department of Epidemiology and Health Statistics, Fujian Provincial Key Laboratory of Environment Factors and Cancer, School of Public Health, Fujian Medical University, Fujian, China<br>wu, yunli; Key Laboratory of Ministry of Education for Gastrointestinal Cancer, Fujian Medical University, Fujian, China<br>hu, zhijian; Department of Epidemiology and Health Statistics, Fujian Provincial Key Laboratory of Environment Factors and Cancer, School of Public Health, Fujian Medical University, Fujian, China<br>lin, xu; Key Laboratory of Ministry of Education for Gastrointestinal Cancer, Fujian Medical University, Fujian, China<br>xu, shanghai; Department of Cardiology, Affiliated Nanping First Hospital, Fujian Medical University, Nanping, China<br>Peng, Xian-E; Fujian Medical University, Department of Epidemiology and Health Statistics, Fujian Provincial Key Laboratory of Environment Factors and Cancer, School of Public Health, Fujian Medical University, Fujian, China |
| <b>Primary Subject Heading</b>: | Gastroenterology and hepatology                                                                                                                                                                                                                                                                                                                                                                                                                                                                                                                                                                                                                                                                                                                                                                                                                                                                                                                                                                                                                                                                                                                                                                                                                                                                                                                                                                                                                                                                                                                                       |
| Secondary Subject Heading:      | Sports and exercise medicine                                                                                                                                                                                                                                                                                                                                                                                                                                                                                                                                                                                                                                                                                                                                                                                                                                                                                                                                                                                                                                                                                                                                                                                                                                                                                                                                                                                                                                                                                                                                          |
| Keywords:                       | Lipid disorders < DIABETES & ENDOCRINOLOGY, Hepatology < INTERNAL MEDICINE, PUBLIC HEALTH, SPORTS MEDICINE                                                                                                                                                                                                                                                                                                                                                                                                                                                                                                                                                                                                                                                                                                                                                                                                                                                                                                                                                                                                                                                                                                                                                                                                                                                                                                                                                                                                                                                            |
|                                 |                                                                                                                                                                                                                                                                                                                                                                                                                                                                                                                                                                                                                                                                                                                                                                                                                                                                                                                                                                                                                                                                                                                                                                                                                                                                                                                                                                                                                                                                                                                                                                       |

SCHOLARONE™  
Manuscripts

1  
2  
3  
4  
5  
6  
7  
8  
9  
10  
11  
12  
13  
14  
15  
16  
17  
18  
19  
20  
21  
22  
23  
24  
25  
26  
27  
28  
29  
30  
31  
32  
33  
34  
35  
36  
37  
38  
39  
40  
41  
42  
43  
44  
45  
46  
47  
48  
49  
50  
51  
52  
53  
54  
55  
56  
57  
58  
59  
60

1  
2  
3  
4  
5 ***The dose-response association between physical activity and***  
6 ***non-alcoholic fatty liver disease: a case-control study in a***  
7 ***Chinese population***  
8  
9  
10  
11  
12  
13  
14

15 YangFan Li<sup>1¶</sup>, Fei He<sup>1¶</sup>, Yun He<sup>2</sup>, XinTing Pan <sup>1</sup>, Yunli Wu<sup>2</sup>, ZhiJian Hu <sup>1</sup>, Xu  
16  
17  
18 Lin<sup>2</sup>,  
19  
20  
21 ShangHua Xu <sup>3\*</sup> and XianE Peng <sup>1,2\*</sup>  
22  
23

24 <sup>1</sup> Department of Epidemiology and Health Statistics, Fujian Provincial Key  
25  
26 Laboratory of Environment Factors and Cancer, School of Public Health, Fujian  
27  
28 Medical University, Fujian, China;  
29  
30

31  
32 <sup>2</sup> Key Laboratory of Ministry of Education for Gastrointestinal Cancer, Fujian  
33  
34 Medical University, Fujian, China;  
35  
36

37  
38 <sup>3</sup> Department of Cardiology, Affiliated Nanping First Hospital, Fujian Medical  
39  
40 University, Nanping, China  
41  
42

43 ¶ Both authors contributed equally to this work.  
44

45  
46 \* Correspondence: [fmuxe@163.com](mailto:fmuxe@163.com) (X.E.P.) or  
47  
48 [13365998866@163.com](mailto:13365998866@163.com)(S.H.X.);  
49  
50

51  
52 Word count: 3109  
53  
54  
55  
56  
57  
58  
59  
60

---

**Running title:** Exercise and non-alcoholic fatty liver disease**Abstract**

**Aim:** Physical activity plays an important role in the development of non-alcoholic fatty liver disease (NAFLD). However, the optimal intensity and dose of physical activity for the treatment of NAFLD have yet to be found. In the present study, we aimed to provide a dose-response association between physical activity and NAFLD in a Chinese population.

**Methods:** We recruited 543 patients with NAFLD diagnosed by abdominal ultrasonography, and 543 age- and sex-matched controls. The amount of physical activity, sedentary time and energy intake was collected through a structured questionnaire. Logistic regression analyses were performed to investigate the association between physical activity and NAFLD.

**Results:** After adjusting for hypertension, diabetes, body mass index (BMI), fasting blood glucose, energy intake and sedentary time, the total amount of physical activity was found to be inversely associated with NAFLD in a dose-dependent manner in males. (>3180 MET-min/week vs. ≤1440 MET-min/week: OR=0.60, 95% CI=0.40-0.91, *P* for trend=0.01). In addition, both moderate- and vigorous-intensity physical activity were effective in reducing the risk of NAFLD, independent of confounding variables in males (Moderate-intensity physical activity: >684 MET-min/week vs. none: OR=0.58, 95%CI= 0.40-0.86, *P* for trend=0.01; Vigorous-intensity physical activity: >960 MET-min/week vs. none: OR=0.63, 95%CI=0.41-0.95, *P* for trend=0.02).

**Conclusions:** Physical activity was inversely associated with risk of NAFLD in a

dose-dependent manner in males. Vigorous- and moderate-intensity physical activity were both beneficial to NAFLD, independent of sedentary time and energy intake.

**Key words:** Energy intake; Metabolic Equivalent of energy ; non-alcoholic fatty liver disease; physical activity

### **Strengths and limitations of this study**

- This study had a considerable sample size and several potential confounding variables such as energy intake and sedentary time, were taken into account.
- The intensity of physical activity was measured in terms of Metabolic Equivalent of energy (MET) and dose of physical activity was presented in the form of MET-min/week
- This study was a case-control design, thus the causal association between physical activity and NAFLD could not be precisely identified.
- This study was a case-control study , recall bias was inevitable and randomized controlled trial studies are therefore required for more accurate results.

### **Introduction**

Non-alcoholic fatty liver disease (NAFLD) is defined as fat accumulation in more than 5% of hepatocytes, without competing liver disease such as viral hepatitis or autoimmune hepatitis.

[1]It encompass a broad spectrum of hepatic dysfunction ranging from simple hepatic lipid accumulation (steatosis) to non-alcoholic steatohepatitis (NASH), fibrosis, cirrhosis and finally hepatocellular carcinoma.[2] A meta-analysis indicated that 25.24% of global population have NAFLD, [3] similar to the prevalence rate in China of 20%.[4]Observation studies showed that

1  
2  
3  
4 patients with NAFLD have a higher risk of developing extrahepatic complications such as  
5  
6 cardiovascular disease, diabetes and metabolic syndrome.<sup>[5-7]</sup> Therefore, NAFLD is recognized  
7  
8 as a global health burden and it is crucial to explore effective prevention and treatment strategies.  
9

10  
11 Physical activity as a lifestyle modification plays an important role in the development of  
12  
13 NAFLD. Previous studies found an inverse relationship between physical activity and the risk of  
14  
15 NAFLD, <sup>[8-9]</sup> and randomized controlled trials also demonstrated that physical activity improved  
16  
17 liver enzyme function and reduced fat accumulation. <sup>[10-13]</sup> A meta-analysis of 20 RCTs showed  
18  
19 that levels of alanine aminotransferase (ALT), gamma-glutamyltranspeptidase (GGT), aspartate  
20  
21 aminotransferase (AST), and intrahepatic fat of the intervention group were significantly better  
22  
23 than the control group.<sup>[14]</sup> However, physical activity is a complex concept and includes type,  
24  
25 intensity, frequency and duration. Many studies only consider the frequency of physical activity,  
26  
27 and this does not reflect the dose. In addition, most studies had a limited sample size and the data  
28  
29 on physical activity was retrieved from populations with diverse demographic characteristics.  
30  
31 Therefore, the optimal intensity and dose of physical activity for the treatment of NAFLD have  
32  
33 yet to be found. For example, a report from the Korean suggested that exercising more than twice  
34  
35 a week and for more than 30 minutes can decrease the risk of hepatic steatosis. <sup>[15]</sup> Another study,  
36  
37 from America, found that moderate-intensity exercise might reduce the risk of hepatic steatosis,  
38  
39 but did not make a specific recommendation about the desired. <sup>[16]</sup>  
40  
41  
42  
43  
44  
45  
46  
47  
48  
49

50  
51 In the present study, Metabolic Equivalent of Energy (MET) was used as a measure of  
52  
53 physical activity. We aimed to explore the dose-response relationship between physical activity  
54  
55 and NAFLD in a Chinese population, taking into consideration confounding variables such as  
56  
57  
58  
59



energy intake and sedentary time.

## Methods

### *Patient and Public Involvement*

This study is a case-control design focused on a Chinese Han population between 18 and 70 years old. Subjects were recruited from a health examination center of Nanping First Affiliated Hospital of Fujian Medical University from October 2015 to September 2017. All subjects underwent abdominal ultrasound and blood biochemical tests. Once cases and controls have been linked to the NAFLD, a letter of invitation and information about the study will be sent to each potential case and control to obtain consent. Eligible subjects will be interviewed face-to-face by investigators to collect data. The study was approved by the local ethics committees of Fujian Medical University (ethics number 2014096). In addition, all methods were performed in accordance with the relevant guidelines and regulations.

### *Sample size calculation*

This study is a case-control design, thus we estimate the sample size based on the Case-control study formula for 1:1 frequency matching. By consulting the literature,<sup>[17]</sup> we estimate OR=0.7,  $p_0=0.6$ . The calculated sample size was  $N_{\text{case}}=508=508$ . Finally 1086 subjects (543 cases and 543 controls) were recruited in this study.

### *Outcome—eligibility of NAFLD cases and controls*

NAFLD was diagnosed by the presence of at least two of the following three abnormal findings on abdominal ultrasonography: <sup>[18]</sup>(1) increased echogenicity of the liver near-field

1  
2  
3  
4 region with deep attenuation of the ultrasound signal; (2) hyperechogenicity of liver tissue (“bright  
5  
6 liver”), as often compared to hypoechogenicity of the kidney cortex; and (3) vascular blurring.  
7  
8  
9 Exclusion criteria were as follows: (1) alcohol consumption >140 g/week for men and >70 g/week  
10  
11 for women; (2) presence of hepatitis B surface antigen or hepatitis C antibodies; (3) use of  
12  
13 hepatotoxic drugs (such as tamoxifen, amiodarone, valproate and methotrexate) [19] which can  
14  
15 induce hepatic fat accumulation; (4) hepatic disease which can induce hepatic fat accumulation;  
16  
17  
18 (5) hepatic disease such as Wilson’s disease, autoimmune hepatitis and hemochromatosis. A total  
19  
20 of 543 newly-diagnosed NAFLD patients were enrolled; and 543 controls were selected by  
21  
22 frequency-matching according to age ( $\pm 5$  years) and gender from a healthy population who  
23  
24  
25 underwent abdominal ultrasonography examination during the same period.  
26  
27  
28

### 30 *Exposure—physical activity measurements*

31  
32 Physical activity during the past seven days was quantified through a questionnaire based  
33  
34 on the International Physical Activity Questionnaire, adapted to the characteristics of Nanping  
35  
36 residents.[20] It includes four domains (transportation-related, work-related, household-related and  
37  
38 leisure time-related). Each domain includes specific activities which correspond to various  
39  
40 intensities of exercise (light-, moderate- and vigorous-intensity). Participants were asked to  
41  
42 estimate information on the frequency and duration spent in specific activities during the past  
43  
44 seven days. Sedentary time was measured by the single question, “During the past seven days,  
45  
46 how much time did you usually spend sitting on a day?”  
47  
48  
49  
50  
51

52  
53 The intensity of physical activity was defined in terms of Metabolic Equivalent of Energy  
54  
55 (MET). According to a standard reference, each kind of activity was assigned a specific MET  
56  
57  
58  
59

value: low-intensity physical activities were defined as <3METs, moderate-intensity activities defined as 3~6 METs and vigorous-intensity activities defined as >6METs.<sup>[21]</sup> The dose of specific physical activity was quantified by the frequency and duration and presented in the form of MET-minutes per week (MET-min/week = duration X frequency per week X MET value). The total dose of physical activity equals the sum of the doses for each specific activity.

### ***Potential confounders***

Face-to-face investigation was performed by uniformly trained investigators. Data were collected in the following four categories, using a structured questionnaire for the first two:

(1) Demographic characteristics including age, gender, education, income, marriage status and history of diabetes).

(2) Health-related behaviors including smoking status, alcohol drinking, tea consumption, total energy intake.

Total energy intake was assessed by semi-quantitative food frequency questionnaire (FFQ),<sup>[22]</sup> which had been specifically developed and validated for the southern Chinese population.<sup>[23]</sup> Participants were asked to estimate information on the average frequency of consumption of selected foods and the estimated portion size over the previous year, ignoring any recent changes. Intakes of food were converted into g per day. Each food item was assigned a specific energy according to Food Nutrition Facts Table and total energy intake was the sum of the energy of various foods ingested in a day.<sup>[24]</sup>

Smokers were defined as those who had smoked at least one cigarette per day during the previous six months. Tea consumption was defined as drinking one or more cups of tea per day

1  
2  
3  
4 during the previous six months.

5  
6 (3) Anthropometric assessment including height, body weight and blood pressure.

7  
8  
9 Body mass index (BMI) was calculated as body weight (kg)/height<sup>2</sup> (m<sup>2</sup>), and classified into  
10 four categories: lean  $\leq 18.5$  kg/m<sup>2</sup>, normal: 18.6–23.9 kg/m<sup>2</sup>, overweight: 24.0–27.9 kg/m<sup>2</sup>, obese:  $\geq 28.0$   
11 kg/m<sup>2</sup>. [25]

12  
13  
14 For blood pressure measurement, participants were first asked to rest for 10 min. Then, the  
15 trained investigators measured blood pressure twice on seated participants using a standard  
16 mercury sphygmomanometer, and the mean of the two measurements was considered as the  
17 participant's blood pressure. Hypertension was defined as systolic arterial blood pressure(SABP)  
18  $\geq 140$  mmHg or diastolic arterial blood pressure(DABP)  $\geq 90$  mmHg. [26]

19  
20 (4) Biochemical examinations after a 12-hour overnight fast

21  
22 Biochemical parameters including serum aspartate aminotransferase (AST), alanine  
23 aminotransferase(ALT), gamma-glutamyltranspeptidase(GGT), serum fasting glucose(FBG),  
24 total cholesterol(TC), triglycerides(TG), low-density lipoprotein(LDL), high-density  
25 lipoprotein(HDL).

26  
27 Blood samples were collected between 8:00 and 10:00 a.m. after fasting overnight (12 h).  
28  
29 Blood biochemical analysis was carried out by the medical laboratory department of Nanping  
30 First Affiliated Hospital of Fujian Medical University.

31  
32  
33 **Statistical analysis**

34  
35 The chi-square test was used to assess categorical variables and the Mann-Whitney U-test

was used for continuous variables. An unconditional logistic regression model was employed to progressively reduce the confounding effect of the relationship between physical activity and NAFLD risk. The Bivariate spearman correlation was conducted to explore the association between physical activity and biochemical parameters. All statistical analyses were conducted using SPSS 23.0. The P-value was defined as two-tailed and set at  $< 0.05$ .

## Results

A total of 1086 subjects (543 cases and 543 controls) were recruited. 742 (68.3%) were male, 344 (3.7%) were female. Baseline characteristics are shown in Table 1. The prevalence of hypertension (30.0 %), overweight or obesity (66.5%) and diabetes (4.8%) were higher in Subjects with NAFLD (each  $P<0.05$ ). And they tend to have tea consumption ( $P=0.04$ ). Serum levels of GGT, ALT, AST, TC, TG, and FBG were also higher than in the control population (each  $P<0.05$ ). Whereas HDL were lower in the cases ( $P<0.05$ ). There was no difference in age, gender, income, marriage status, smoking status, education level, sedentary time or serum level of LDL between the two groups.

Table 1. Baseline characteristics of cases and controls

| Variable                    | case                             | control                          | Z/ $\chi^2$ | P       |
|-----------------------------|----------------------------------|----------------------------------|-------------|---------|
|                             | Number(%), or median (quartiles) | Number(%), or median (quartiles) |             |         |
| Age (years)                 | 48 (39-54)                       | 48 (39-54)                       | -0.03       | 0.97    |
| Gender                      |                                  |                                  | <           | 1       |
| Male                        | 371 (68.3)                       | 371 (68.3)                       |             |         |
| Female                      | 172 (31.7)                       | 172 (31.7)                       |             |         |
| Blood pressure (mm/Hg)      |                                  |                                  | 20.60       | < 0.001 |
| <140/90                     | 380 (70.0)                       | 444 (81.8)                       |             |         |
| ≥140/90                     | 163 (30.0)                       | 99 (18.2)                        |             |         |
| BMI (kg/m <sup>2</sup> )    |                                  |                                  | 208.5       | < 0.001 |
| ≤18.5                       | 3 (0.6)                          | 20 (3.7)                         |             |         |
| 18.6–23.9                   | 179 (33.0)                       | 388 (71.5)                       |             |         |
| 24.0–27.9                   | 284 (52.3)                       | 129 (23.8)                       |             |         |
| ≥28.0                       | 77 (14.2)                        | 6 (1.1)                          |             |         |
| Diabetes                    |                                  |                                  | 5.35        | 0.02    |
| No                          | 517 (95.2)                       | 531 (97.8)                       |             |         |
| Yes                         | 26 (4.8)                         | 12 (2.2)                         |             |         |
| Education level             |                                  |                                  | 5.52        | 0.06    |
| Primary education           | 274 (50.5)                       | 286 (52.7)                       |             |         |
| Secondary education         | 158 (29.1)                       | 126 (23.2)                       |             |         |
| Bachelor degree             | 111 (20.4)                       | 131 (24.1)                       |             |         |
| Income (¥)                  |                                  |                                  | 1.44        | 0.49    |
| <1000                       | 33 (6.1)                         | 35 (6.4)                         |             |         |
| 1000–2000                   | 161 (29.7)                       | 178 (32.8)                       |             |         |
| ≥2000                       | 349 (64.3)                       | 330 (60.8)                       |             |         |
| Tea consumption             |                                  |                                  | 4.40        | 0.04    |
| No                          | 338 (62.2)                       | 239 (44.0)                       |             |         |
| Yes                         | 205 (37.8)                       | 304 (56.0)                       |             |         |
| Smoking habit               |                                  |                                  | 0.24        | 0.62    |
| No                          | 140 (25.8)                       | 131 (24.1)                       |             |         |
| Yes                         | 403 (74.2)                       | 412 (75.9)                       |             |         |
| Marital status              |                                  |                                  | 2.65        | 0.10    |
| Single or divorced          | 53 (9.8)                         | 70 (12.9)                        |             |         |
| Married                     | 490 (90.2)                       | 473 (87.1)                       |             |         |
| Sedentary time (hours/day)  |                                  |                                  | 2.98        | 0.23    |
| <4                          | 167 (30.8)                       | 184 (33.9)                       |             |         |
| 4–8                         | 250 (46.0)                       | 255 (47.0)                       |             |         |
| ≥8                          | 126 (23.2)                       | 104 (19.2)                       |             |         |
| Energy intake ( Kilojoule ) | 2227.34 (1778.78-2664.85)        | 2106.85(1696.41-2600.52)         | -2.32       | 0.02    |
| GGT (IU/L)                  | 32(23.00-45.00)                  | 23(17.00-32.00)                  | -10.1       | < 0.001 |
| ALT (IU/L)                  | 27(20.00-38.00)                  | 20(15.00-25.00)                  | -11.4       | < 0.001 |
| AST (IU/L)                  | 24(20.00-28.00)                  | 22(18.00-25.00)                  | -5.69       | < 0.001 |
| TC (mmol/L)                 | 5.19 (4.64-5.77)                 | 5.03(4.53-5.53)                  | -2.76       | 0.06    |
| TG (mmol/L)                 | 1.85 (1.29-2.54)                 | 1.18(0.87-1.59)                  | -13.4       | < 0.001 |
| FBG (mmol/L)                | 5.37 (5.03-5.84)                 | 5.20(4.90-5.53)                  | -6.16       | < 0.001 |
| HDL (mmol/L)                | 1.21 (1.06-1.37)                 | 1.34(1.18-1.48)                  | -9.16       | < 0.001 |
| LDL (mmol/L)                | 3.27 (2.63-3.79)                 | 3.17(2.68-3.74)                  | -0.61       | 0.54    |

1  
2  
3 AST=serum aspartate aminotransferase, ALT=alanine aminotransferase, GGT= gamma-glutamyltranspeptidase, FBG=serum fasting glucose, TC=total cholesterol,  
4 TG=triglycerides, LDL=low-density lipoprotein,HDL=high-density lipoprotein, BMI=body mass index  
5

6 In total population, there is no significant dose-response association between physical  
7 activity and NAFLD after adjusting for BMI, hypertension, diabetes, fasting blood glucose,  
8 energy intake and sedentary time (table s1). Because the prevalence of NAFLD was differed  
9 between males and females, then we used gender-specific model in the further analysis.  
10  
11  
12  
13  
14  
15

16 In male, after adjusting for BMI, hypertension, diabetes, fasting blood glucose, and  
17 sedentary time in Multivariate logistic model 3, physical activity was associated with the risk of  
18 NAFLD in a dose-dependent manner. (>3180 MET-min/week vs. ≤1440 MET-min/week: OR=  
19 0.61, 95% CI=0.41-0.92, *P* for trend= 0.02). After further adjusting for energy intake, this  
20 association was maintained (>3180 MET-min/week vs. ≤1440 MET-min/week: OR= 0.60, 95%  
21 CI=0.40-0.91, *P* for trend= 0.01, Table 2).In female, there exist no relationship between physical  
22 activity and NAFLD (table s2).  
23  
24  
25  
26  
27  
28  
29  
30  
31  
32  
33  
34

35 Then we further analyzed the association between various intensities of physical activity  
36 and the risk of NAFLD. In males, the moderate- and vigorous-intensity levels were inversely  
37 associated with the risk of NAFLD, independent of the confounding variables:  
38 (Moderate-intensity physical activity: >684MET-min/week vs. none: OR=0.58, 95%  
39 CI=0.40-0.86, *P* for trend=0.01; Vigorous-intensity physical activity: >960 MET-min/week vs.  
40 none: OR=0.63, 95% CI= 0.41-0.95, *P* for trend=0.02, Table 2).In female, there is no association  
41 between various intensity of physical activity and NAFLD (table s3).  
42  
43  
44  
45  
46  
47  
48  
49  
50  
51  
52  
53  
54  
55  
56  
57  
58  
59  
60

Table 2. Association between physical activity and NAFLD in male

| Variable<br>(MET-minute/week) | Case<br>number (%) | Control<br>number(%) | Univariate model<br>OR (95% CI) | Multivariate model 1<br>aOR (95% CI) | Multivariate model 2<br>aOR (95% CI) | Multivariate model 3<br>aOR (95% CI) |
|-------------------------------|--------------------|----------------------|---------------------------------|--------------------------------------|--------------------------------------|--------------------------------------|
| Total amount of               |                    |                      |                                 |                                      |                                      |                                      |
| ≤1440                         | 153 (41.2)         | 124 (33.4)           | 1 (reference)                   | 1 (reference)                        | 1 (reference)                        | 1 (reference)                        |
| 1440~3180                     | 104 (28.0)         | 124(33.4)            | 0.68(0.48-0.97)                 | <b>0.62 (0.41-0.93)</b>              | <b>0.62 (0.41-0.93)</b>              | <b>0.62 (0.41-0.92)</b>              |
| >3180                         | 114(30.7)          | 123(33.2)            | 0.75 (0.53-1.06)                | <b>0.62 (0.41-0.92)</b>              | <b>0.61 (0.41-0.92)</b>              | <b>0.60(0.40-0.91)</b>               |
| <i>P</i> value for trend      |                    |                      | 0.09                            | <b>0.02</b>                          | <b>0.02</b>                          | <b>0.01</b>                          |
| Light intensity               |                    |                      |                                 |                                      |                                      |                                      |
| ≤525                          | 121 (32.6)         | 125 (33.7)           | 1 (reference)                   | 1 (reference)                        | 1 (reference)                        | 1 (reference)                        |
| 525~1500                      | 127(34.2)          | 125(33.7)            | 1.05 (0.74-1.49)                | 1.00(0.67-1.49)                      | 1.00 (0.67-1.50)                     | 1.03(0.69-1.55)                      |
| >1500                         | 123 (33.2)         | 121 (32.6)           | 1.05 (0.74-1.50)                | 0.96(0.64-1.43)                      | 0.96(0.64-1.44)                      | 0.95(0.63-1.44)                      |
| <i>P</i> value for trend      |                    |                      | 0.79                            | 0.83                                 | 0.84                                 | 0.82                                 |
| Moderate intensity            |                    |                      |                                 |                                      |                                      |                                      |
| None                          | 204 (55)           | 170 (45.8)           | 1 (reference)                   | 1 (reference)                        | 1 (reference)                        | 1 (reference)                        |
| ≤684                          | 74 (19.9)          | 79 (21.3)            | 0.78 (0.54-1.14)                | 0.79 (0.52-1.21)                     | 0.79 (0.51-1.21)                     | 0.78(0.51-1.20)                      |
| >684                          | 93 (25.1)          | 122 (32.9)           | <b>0.64 (0.45-0.89)</b>         | <b>0.59 (0.40-0.86)</b>              | <b>0.58(0.39-0.86)</b>               | <b>0.58(0.40-0.86)</b>               |
| <i>P</i> value for trend      |                    |                      | <b>0.01</b>                     | <b>0.01</b>                          | <b>0.01</b>                          | <b>0.01</b>                          |
| Vigorous intensity            |                    |                      |                                 |                                      |                                      |                                      |
| none                          | 272 (73.3)         | 251 (67.7)           | 1 (reference)                   | 1 (reference)                        | 1 (reference)                        | 1 (reference)                        |
| ≤960                          | 28 (7.5)           | 35(9.4)              | 0.74 (0.44-1.25)                | 0.77 (0.42-1.42)                     | 0.77(0.42-1.42)                      | 0.77(0.42-1.41)                      |
| >960                          | 71 (19.1)          | 85 (22.9)            | 0.77 (0.54-1.10)                | <b>0.65 (0.43-0.98)</b>              | <b>0.65 (0.43-0.98)</b>              | <b>0.63(0.41-0.95)</b>               |
| <i>P</i> value for trend      |                    |                      | 0.12                            | <b>0.03</b>                          | <b>0.03</b>                          | <b>0.02</b>                          |

NAFLD: Non-alcoholic fatty liver disease

Multivariate model 1: adjusted for BMI, hypertension, diabetes, and fasting blood glucose

Multivariate model 2: adjusted for BMI, hypertension, diabetes, fasting blood glucose and sedentary time.

Multivariate model 3: adjusted for BMI, hypertension, diabetes, fasting blood glucose, sedentary time and energy intake.

ORs = odds ratios, aOR= adjusted odds ratios, CIs = confidence intervals

According to the Physical Activity Guidelines for Americans (PAGA) released by the USDHHS<sup>[27]</sup>: more than 150 minutes of moderate-intensity physical activity per week or 75 minutes of vigorous-intensity physical activity per week is beneficial to health, we divided physical activity into different levels. The dose-response association was shown: males who underwent moderate- or vigorous-intensity physical activity had a significantly lower risk of



NAFLD (Moderate-intensity physical activity  $\geq 2.5$  hours vs. none: OR=0.63, 95% CI=0.43-0.92;  $P$  for trend=0.01; Vigorous-intensity physical activity  $\geq 1.25$  hours vs. none: OR=0.66, 95% CI=0.45-0.96;  $P$  for trend=0.03, Table 3).

Table 3. Association between moderate- or vigorous-intensity physical activity and NAFLD in males

| Variable            | Case<br>(MET-minute/week<br>number (%)) | Control<br>number(%) | Univariate model<br>OR (95% CI) | Multivariate<br>aOR (95% CI) | Multivariate model 2<br>aOR (95% CI) | Multivariate model 3<br>aOR (95% CI) |
|---------------------|-----------------------------------------|----------------------|---------------------------------|------------------------------|--------------------------------------|--------------------------------------|
| Moderate intensity  |                                         |                      |                                 |                              |                                      |                                      |
| None                | 204(55.0)                               | 170 (45.8)           | 1 (reference)                   | 1 (reference)                | 1 (reference)                        | 1 (reference)                        |
| ~2.5 hours          | 67 (18.1)                               | 75(20.2)             | 0.74 (0.51-1.10)                | 0.73 (0.47-1.13)             | 0.72 (0.47-1.12)                     | 0.72 (0.46-1.12)                     |
| $\geq 2.5$ hours    | 100 (27.0)                              | 126(34.0)            | <b>0.66 (0.47-0.92)</b>         | <b>0.63 (0.43-0.91)</b>      | <b>0.62(0.43-0.91)</b>               | <b>0.63(0.43-0.92)</b>               |
| $P$ value for trend |                                         |                      | <b>0.01</b>                     | <b>0.01</b>                  | <b>0.01</b>                          | <b>0.01</b>                          |
| Vigorous intensity  |                                         |                      |                                 |                              |                                      |                                      |
| None                | 272(73.3)                               | 251(67.7)            | 1 (reference)                   | 1 (reference)                | 1 (reference)                        | 1 (reference)                        |
| ~1.25hours          | 9(2.4)                                  | 12 (3.2)             | 0.69 (0.29-1.67)                | 0.73 (0.26-2.07)             | 0.73 (0.26-2.07)                     | 0.74(0.26-2.08)                      |
| $\geq 1.25$ hours   | 90(24.3)                                | 108 (29.1)           | 0.77 (0.55-1.07)                | <b>0.68 (0.47-0.98)</b>      | <b>0.68 (0.46-0.98)</b>              | <b>0.66(0.45-0.96)</b>               |
| $P$ value for trend |                                         |                      | 0.10                            | <b>0.04</b>                  | <b>0.04</b>                          | <b>0.03</b>                          |

NAFLD: Non-alcoholic fatty liver disease

Multivariate model 1: adjusted for BMI, hypertension, diabetes, and fasting blood glucose

Multivariate model 2: adjusted for BMI, hypertension, diabetes, fasting blood glucose and sedentary time.

Multivariate model 3: adjusted for BMI, hypertension, diabetes, fasting blood glucose, sedentary time and energy intake.

ORs = odds ratios, aOR= adjusted odds ratios, CIs = confidence intervals

We explored the association between physical activity and biochemical indicators. In NAFLD patients, subjects who undergo a higher total amount of physical activity tend to have significantly lower levels of GGT ( $P=0.02$ ). In the control population, greater physical activity was significantly associated with greater AST ( $P=0.001$ ) (Table 4).

Table 4. Association between total amount of physical activity and biochemical indicators in males

| Variable     | case                                   |             | control                                |              |
|--------------|----------------------------------------|-------------|----------------------------------------|--------------|
|              | Physical activity<br>(MET-minute/week) |             | Physical activity<br>(MET-minute/week) |              |
|              | Correlation                            | <i>p</i>    | Correlation coefficient                | <i>p</i>     |
| GGT (IU/L)   | <b>-0.13</b>                           | <b>0.02</b> | 0.05                                   | 0.33         |
| ALT (IU/L)   | -0.09                                  | 0.09        | 0.10                                   | 0.05         |
| AST (IU/L)   | 0.01                                   | 0.80        | <b>0.17</b>                            | <b>0.001</b> |
| TC (mmol/L)  | 0.01                                   | 0.87        | 0.01                                   | 0.80         |
| TG (mmol/L)  | -0.04                                  | 0.47        | -0.04                                  | 0.40         |
| HDL (mmol/L) | 0.05                                   | 0.35        | 0.03                                   | 0.53         |
| LDL (mmol/L) | -0.03                                  | 0.59        | 0.02                                   | 0.76         |

AST=serum aspartate aminotransferase, ALT=alanine aminotransferase, GGT= gamma-glutamyltranspeptidase, FBG=serum fasting glucose, TC=total cholesterol, TG=triglycerides, LDL=low-density lipoprotein, HDL=high-density lipoprotein, BMI=body mass index

## Discussion

Physical activity is a complex concept including type, intensity, frequency and duration. The parameters used to define the intensity of physical activity fall into two categories: absolute or relative. Absolute intensity refers to the rate of energy expenditure during physical activity and is usually presented as Metabolic Equivalent of Energy (MET). MET is a widely-used physiological concept defined as the ratio of work metabolic rate to a standard resting metabolic rate of 1Kcal/kg·h (1 MET=3.5ml O<sub>2</sub>/kg·min=1Kcal/kg·h).<sup>[28]</sup> Moderate-intensity physical activity corresponds to 40%~60% of VO<sub>2</sub> max or 4~6 METs. Vigorous-intensity physical activity corresponds to ≥60% of VO<sub>2</sub> max or > 6METs.<sup>[29]</sup> Since different methods are used to assess physical activity in the literature, the optimal intensity and dose of physical activity for the treatment of NAFLD have yet to be determined.

In the present study, the intensity of physical activity was measured in terms of MET; and

dose of physical activity was presented in the form of MET-min/week. We observed an inverse dose-response association between physical activity and the risk of NAFLD, independent of potential confounding variables in males. Males with more than 3180 MET-min/week total physical activity had a 40% lower risk of NAFLD compared to those with less than 1440 MET-min/week. In addition, we also found that moderate- and vigorous-intensity physical activity were beneficial to NAFLD in males. When the dose of physical activity was divided according to the Physical Activity Guidelines for Americans (PAGA) released by the USDHHS<sup>27</sup> (more than 150 minutes of moderate-intensity physical activity per week or 75 minutes of vigorous-intensity physical activity per week is beneficial to health), the dose-response association was maintained. Several studies using maximal heart rate or percentage of  $VO_2$  max to define the intensity of physical activity indirectly supported our findings. One other cross-sectional study has also found a dose-response association between physical activity and NAFLD risk in terms of MET.<sup>[30]</sup> This study suggested that males with a dose of more than 5760 MET-min/week had a 31% lower risk of NAFLD compared to those with less than 498 MET-min/week. In females, the association was weaker. However, the study population was heterogeneous, meaning that the results should be interpreted with caution and that optimal dose of physical activity should be tailored to the patient's clinical characteristics, fitness status and preferences.

The mechanism by which physical activity improves NAFLD is unclear, although several potential mechanisms have been suggested. First, insulin sensitivity is a plausible explanation,<sup>[31]</sup> via increasing expression of glucose transport protein and synthase activity of muscle glycogen,

1  
2  
3  
4 and decreasing the accumulation of serum triglyceride. Secondly, physical activity decreases  
5  
6 visceral adiposity, which in turn decreases free fatty acid influx to the liver. Thirdly, physical  
7  
8 activity is known to upregulate the intake of glucose and lipid oxidation in skeletal muscle,  
9  
10 which in turn depletes the accumulation of fatty acid in the liver.<sup>[32]</sup> In the present study, we  
11  
12 observed that increased physical activity was associated with decreased GGT levels in males  
13  
14 with NAFLD, and males with higher physical activity tend to have higher AST levels in controls.  
15  
16 Nevertheless, more studies are still needed to confirm the association between physical activity  
17  
18 and NAFLD and potential mechanisms should be explored.  
19  
20  
21  
22  
23

#### 24 *Strengths and limitations*

25  
26  
27 There were several advantages to the current study. First, several potential confounding  
28  
29 variables, including energy intake and sedentary time, were taken into account. With the  
30  
31 development of technology and a better economy, people tend to spend more time in sedentary  
32  
33 activities: one study showed that sitting time was positively associated with risk of NAFLD,  
34  
35 even in subjects with a high level of physical activity.<sup>[33]</sup> Similarly, another study indicated that  
36  
37 regular participation in high levels of physical activity does not fully protect against the risks  
38  
39 associated with prolonged bouts of sedentary behaviors.<sup>[34]</sup> Other known risk factors of NAFLD  
40  
41 are energy intake and BMI. Several previous studies have found that NAFLD patients tend to  
42  
43 have higher energy intake, and a restricted-energy diet was found to have great benefits for  
44  
45 weight loss and improving BMI. <sup>[35-38]</sup> However, few studies have considered sedentary time and  
46  
47 energy intake at the same time when investigating the association between physical activity and  
48  
49 NAFLD. The potential confounding effect of these factors may reduce the power to detect  
50  
51  
52  
53  
54  
55  
56  
57  
58  
59  
60

1  
2  
3  
4 associations between physical activity and the risk of NAFLD.

5  
6 A second advantage to our study was that we used the well-known parameter MET to  
7 quantify the intensity of physical activity; and also quantified dose of physical activity as  
8 frequency and duration. We found a dose–response association between physical activity and  
9 risk of NAFLD, which could provide evidence for a clinical treatment guideline for NAFLD.  
10  
11  
12  
13  
14  
15

16  
17 A third advantage was that this study had a considerable sample size and could thus provide  
18 substantial statistical power to assess the effect of physical activity on NAFLD.  
19  
20  
21

22 However, several limitations should be considered. First, this study was a case-control  
23 design, thus the causal association between physical activity and NAFLD could not be precisely  
24 identified. Second, the level of physical activity was self-reported: subjects often have difficulty  
25 in recalling physical activity undertaken in the past seven days and tend to underestimate the  
26 time spent in specific activities. Therefore, misclassification bias was inevitable and could have  
27 affected the calculated association between physical activity and NAFLD. Randomized  
28 controlled trial studies are therefore required for more accurate results. Third, Liver biopsy is the  
29 gold standard for quantitative diagnosis of NAFLD. However it is an invasive examination, there  
30 exist the possibility of postoperative blood and bile leakage, and there are sampling errors,  
31 therefore does not apply to routine screening. In current study, NAFLD was diagnosed by  
32 abdominal ultrasonography. Ultrasound examination currently is the preferred method for the  
33 initial screening of NAFLD with its advantages of no scratching, no radiation damage,  
34 reproducibility and low price. It is based on the enhancement or attenuation of intrahepatic echo  
35 and the progression of intravascular blood vessels. In moderate to severe steatosis, the sensitivity  
36  
37  
38  
39  
40  
41  
42  
43  
44  
45  
46  
47  
48  
49  
50  
51  
52  
53  
54  
55  
56  
57  
58  
59  
60

and specificity of ultrasound diagnosis are high (78.4%~90.8% and 76.9%~90.9%, respectively).<sup>[39]</sup> However, ultrasound diagnosis is susceptible to individual differences, checking instrument performance and parameter selection, operating experience and many other factors, so ultrasound quantitative diagnosis of fatty liver still has limitations. This diagnosis mainly depends on the subjective judgment of the operator, and there is no objective and unified quantitative index. And it is difficult to identify liver fibrosis and liver fat. Each method has its own advantages and disadvantages. It is hoped that with the advancement of science and technology, better non-invasive diagnostic methods will emerge.

## Conclusions

The present study found that high physical activity was inversely associated with the risk of NAFLD in a dose-dependent manner in males, with moderate- and vigorous-intensity physical activity having the greatest effect on reducing risk.

## Acknowledgement

We thank all study participants for their cooperation. We also thank our staff for recruiting subjects and their technical assistance.

## Conflict of interests

all authors have declare: no support from any organization for the submitted work; no financial relationships with any organization that might have an interest in the submitted work in the previous three years, no other relationships or activities that could appear to have influenced the submitted work.

## Contributors

YFL and FH are joint first authors. XEP obtained funding. XEP, ZJH , XL and SHX designed the study. XTP and YFL collected the data. YLW and YH were involved in data cleaning and verification. YFL and XTP analyzed the data. YFL and FH drafted the manuscript. XEP and ZJH contributed to the interpretation of the results and critical revision of the manuscript for important intellectual content and approved the final version of the manuscript. All authors have read and approved the final manuscript.

## Data sharing

No additional data are available.

## Source of funding

This work was supported by the National Natural Science Foundation of China [grant number 81473047 and 81401657], the Training Program Foundation for Middle-aged and Young Talents from Sanitation System of Fujian Province [grant number 2014-ZQN-ZD-23], and the Joint Innovation Project of Science and Technology of Fujian Province [grant number 2017Y9104].

## References

1. CD W, SA H. Features, diagnosis, and treatment of nonalcoholic fatty liver disease.%A Torres DM. *Clinical gastroenterology and hepatology : the official clinical practice journal of the American Gastroenterological Association* 2012;10(8):837-58.
2. Rinella ME. Nonalcoholic fatty liver disease: a systematic review. *JAMA* 2015;313(22):2263-73. doi: 10.1001/jama.2015.5370

3. AB K, D A, Y F, et al. Global epidemiology of nonalcoholic fatty liver disease-Meta-analytic assessment of prevalence, incidence, and outcomes.%A Younossi ZM. *Hepatology (Baltimore, Md)* 2016;64(1):73-84.
4. J X, P C, L C, et al. Prevalence of nonalcoholic fatty liver disease in mainland of China: a meta-analysis of published studies.%A Li Z. *Journal of gastroenterology and hepatology* 2014;29(1):42-51.
5. B R, H P, B D, et al. Non-alcoholic fatty liver disease (NAFLD) and 10-year risk of cardiovascular diseases.%A Motamed N. *Clinics and research in hepatology and gastroenterology* 2017;41(1):31-38.
6. M M, E B, RA D, et al. Non-alcoholic fatty liver disease (NAFLD) and its connection with insulin resistance, dyslipidemia, atherosclerosis and coronary heart disease.%A Gaggini M. *Nutrients* 2013;5(5):1544-60.
7. R L, B O, J F, et al. Prevalence of prediabetes and diabetes and metabolic profile of patients with nonalcoholic fatty liver disease (NAFLD).%A Ortiz-Lopez C. *Diabetes care* 2012;35(4):873-8.
8. V Da, C C, B N, et al. A case-control study on the effect of metabolic gene polymorphisms, nutrition, and their interaction on the risk of non-alcoholic fatty liver disease.%A Miele L. *Genes & nutrition* 2014;9(2):383.
9. M G, GV P, E F, et al. Associations Between Lifestyle Characteristics and the Presence of Nonalcoholic Fatty Liver Disease: A Case-Control Study.%A Katsagoni CN. *Metabolic syndrome and related disorders* 2017;15(2):72-79.



- 
- 1  
2  
3  
4 10. C T, K H, S C, et al. Exercise Reduces Liver Lipids and Visceral Adiposity in Patients With  
5  
6 Nonalcoholic Steatohepatitis in a Randomized Controlled Trial.%A Houghton D.  
7  
8 *Clinical gastroenterology and hepatology : the official clinical practice journal of the*  
9  
10 *American Gastroenterological Association* 2017;15(1):96-102.e3.  
11  
12  
13  
14 11. LL P, ZM M, Z C, et al. Long-term effect of exercise on improving fatty liver and  
15  
16 cardiovascular risk factors in obese adults: A 1-year follow-up study.%A Zhang HJ.  
17  
18 *Diabetes, obesity & metabolism* 2017;19(2):284-89.  
19  
20  
21  
22 12. EP K, B M, BW P, et al. Randomized trial of exercise effect on intrahepatic triglyceride  
23  
24 content and lipid kinetics in nonalcoholic fatty liver disease.%A Sullivan S. *Hepatology*  
25  
26 *(Baltimore, Md)* 2012;55(6):1738-45.  
27  
28  
29  
30 13. C T, KG H, S C, et al. Modified high-intensity interval training reduces liver fat and  
31  
32 improves cardiac function in non-alcoholic fatty liver disease: a randomized controlled  
33  
34 trial.%A Hallsworth K. *Clinical science (London, England : 1979)*  
35  
36 2015;129(12):1097-105.  
37  
38  
39  
40 14. Katsagoni CN, Georgoulis M, Papatheodoridis GV, et al. Effects of lifestyle interventions on  
41  
42 clinical characteristics of patients with non-alcoholic fatty liver disease: A meta-analysis.  
43  
44 *Metabolism* 2017;68:119-32. doi: 10.1016/j.metabol.2016.12.006  
45  
46  
47  
48 15. Korean Association for the Study of the L. KASL clinical practice guidelines: management  
49  
50 of nonalcoholic fatty liver disease. *Clin Mol Hepatol* 2013;19(4):325-48. doi:  
51  
52 10.3350/cmh.2013.19.4.325  
53  
54  
55  
56 16. Chalasani N, Younossi Z, Lavine JE, et al. The diagnosis and management of non-alcoholic  
57  
58  
59  
60

- 1  
2  
3  
4 fatty liver disease: practice guideline by the American Gastroenterological Association,  
5  
6 American Association for the Study of Liver Diseases, and American College of  
7  
8 Gastroenterology. *Gastroenterology* 2012;142(7):1592-609. doi:  
9  
10 10.1053/j.gastro.2012.04.001  
11  
12  
13  
14 17. X C, Z S, L L, et al. Association between physical activity and risk of nonalcoholic fatty liver  
15  
16 disease: a meta-analysis.%A Qiu S. *Therapeutic advances in gastroenterology*  
17  
18 2017;10(9):701-13.  
19  
20  
21  
22 18. Farrell GC, Chitturi S, Lau GKK, et al. Guidelines for the assessment and management of  
23  
24 non-alcoholic fatty liver disease in the Asia-Pacific region: Executive summary. *Journal*  
25  
26 *of Gastroenterology and Hepatology* 2007;22(6):775-77. doi:  
27  
28 10.1111/j.1440-1746.2007.05002.x  
29  
30  
31  
32 19. N C. Drug-induced hepatic steatosis.%A Amacher DE. *Seminars in liver disease*  
33  
34 2014;34(2):205-14.  
35  
36  
37  
38 20. Bassett DR, Jr. International physical activity questionnaire: 12-country reliability and  
39  
40 validity. *Med Sci Sports Exerc* 2003;35(8):1396. doi:  
41  
42 10.1249/01.MSS.0000078923.96621.1D  
43  
44  
45  
46 21. WL H, SD H, N M, et al. 2011 Compendium of Physical Activities: a second update of codes  
47  
48 and MET values.%A Ainsworth BE. *Medicine and science in sports and exercise*  
49  
50 2011;43(8):1575-81.  
51  
52  
53  
54 22. I S, H V, A B-A, et al. Development of a semi-quantitative Food Frequency Questionnaire  
55  
56 (FFQ) to assess dietary intake of multiethnic populations.%A Shahar D. *European*  
57  
58  
59  
60

- 
- 1  
2  
3  
4 *journal of epidemiology* 2003;18(9):855-61.  
5  
6  
7 23. Li K, Takezaki Toshiro, Song Fengy, et al. Relative Validity of a Semi-quantitative Food  
8  
9 Frequency Questionnaire Versus 3 day Weighed Diet Records in Middleaged Inhabitants  
10  
11 in Chaoshan Area, China. *Asian Pacific J Cancer Prev* 2005, 6: 376-381  
12  
13  
14 24. Yuexin Y, Guang W, Xingchang P. *China food composition*. Peking University Medical  
15  
16 Press 2009:1-360  
17  
18  
19 25. He Y, Jiang B, Wang J, et al. BMI versus the metabolic syndrome in relation to  
20  
21 cardiovascular risk in elderly Chinese individuals. *Diabetes Care* 2007;30(8):2128-34.  
22  
23 doi: 10.2337/dc06-2402  
24  
25  
26  
27 26. S M, G M, J W, et al. 1999 World Health Organization-International Society of Hypertension  
28  
29 Guidelines for the management of hypertension. Guidelines sub-committee of the World  
30  
31 Health Organization.%A Chalmers J. *Clinical and experimental hypertension (New York,*  
32  
33 *NY : 1993)* 1999;21(null):1009-60.  
34  
35  
36  
37 27. GJ W, NK B. Physical activity in U.S.: adults compliance with the Physical Activity  
38  
39 Guidelines for Americans.%A Tucker JM. *American journal of preventive medicine*  
40  
41 2011;40(4):454-61.  
42  
43  
44  
45 28. E P, A Y, A H-W, et al. Heart rate as an indicator of the intensity of physical activity in  
46  
47 human adolescents.%A Ekelund U. *European journal of applied physiology*  
48  
49 2001;85(null):244-9.  
50  
51  
52  
53 29. Fletcher GF, Ades PA, Kligfield P, et al. Exercise standards for testing and training: a  
54  
55 scientific statement from the American Heart Association. *Circulation*  
56  
57  
58  
59  
60

- 2013;128(8):873-934. doi: 10.1161/CIR.0b013e31829b5b44
30. D K, GE C, W K, et al. Role of physical activity in nonalcoholic fatty liver disease in terms of visceral obesity and insulin resistance.%A Kwak MS. *Liver international : official journal of the International Association for the Study of the Liver* 2015;35(3):944-52.
31. Y L, RS R, EJ P, et al. Energy-matched moderate and high intensity exercise training improves nonalcoholic fatty liver disease risk independent of changes in body mass or abdominal adiposity - A randomized trial.%A Winn NC. *Metabolism: clinical and experimental* 2018;78(undefined):128-40.
32. J H, LL P, ZM M, et al. Effects of Moderate and Vigorous Exercise on Nonalcoholic Fatty Liver Disease: A Randomized Clinical Trial.%A Zhang HJ. *JAMA internal medicine* 2016;176(8):1074-82.
33. Y C, HS J, KE Y, et al. Relationship of sitting time and physical activity with non-alcoholic fatty liver disease.%A Ryu S. *Journal of hepatology* 2015;63(5):1229-37.
34. SM G, SC M, HR B, et al. Amount of time spent in sedentary behaviors and cause-specific mortality in US adults.%A Matthews CE. *The American journal of clinical nutrition* 2012;95(2):437-45.
35. K Z, Y C, Y L, et al. Associations between Dietary Nutrient Intakes and Hepatic Lipid Contents in NAFLD Patients Quantified by  $^1\text{H}$ -MRS and Dual-Echo MRI.%A Cheng Y. *Nutrients* 2016;8(9):undefined.
36. V dL, J V, J F, et al. Hepatic Steatosis, Carbohydrate Intake, and Food Quotient in Patients with NAFLD.%A Gonzalez C. *International journal of endocrinology*

2013;2013(undefined):428542.

37. A D, B K, H L, et al. Health Benefits of Fasting and Caloric Restriction.%A Golbidi S.

*Current diabetes reports* 2017;17(12):123.

38. SM A, A E, P A, et al. Dietary Quality Indices and Biochemical Parameters Among Patients

With Non Alcoholic Fatty Liver Disease (NAFLD).%A Hashemi Kani A. *Hepatitis*

*monthly* 2013;13(7):e10943.

39. JR vW, S B, J S. The diagnostic accuracy of US, CT, MRI and 1H-MRS for the evaluation of

hepatic steatosis compared with liver biopsy: a meta-analysis.%A Bohte AE. *European*

*radiology* 2011;21(1):87-97.

Table S1. Association between physical activity and NAFLD

| Variable                 | Case       | Control    | Univariate model        | Multivariate model 1    | Multivariate model 2    | Multivariate model 3   |
|--------------------------|------------|------------|-------------------------|-------------------------|-------------------------|------------------------|
| (MET-minute/week)        | number     | number(%)  | OR (95% CI)             | aOR (95% CI)            | aOR (95% CI)            | aOR (95% CI)           |
| Total amount of          |            |            |                         |                         |                         |                        |
| ≤1620                    | 182 (33.5) | 152 (28)   | 1 (reference)           | 1 (reference)           | 1 (reference)           | 1 (reference)          |
| 1620~3943.8              | 180 (33.1) | 200(36.8)  | 0.75(0.56-1.01)         | 0.72 (0.52-1.00)        | 0.72(0.52-1.01)         | 0.74(0.53-1.03)        |
| >3943.8                  | 181(33.3)  | 191(35.2)  | 0.79 (0.59-1.06)        | 0.75 (0.54-1.05)        | 0.76(0.54-1.07)         | 0.79(0.56-1.11)        |
| <i>P</i> value for trend |            |            | 0.13                    | 0.11                    | 0.13                    | 0.19                   |
| Light intensity          |            |            |                         |                         |                         |                        |
| ≤840                     | 183 (33.7) | 193 (35.5) | 1 (reference)           | 1 (reference)           | 1 (reference)           | 1 (reference)          |
| 840~2100                 | 185 (34.1) | 196(36.1)  | 1.00 (0.75-1.32)        | 0.97(0.70-1.34)         | 0.98 (0.71-1.35)        | 1.00(0.73-1.39)        |
| >2100                    | 175 (32.2) | 154 (28.4) | 1.20 (0.89-1.61)        | 1.22(0.88-1.71)         | 1.26(0.90-1.77)         | 1.32(0.94-1.86)        |
| <i>P</i> value for trend |            |            | 0.24                    | 0.24                    | 0.19                    | 0.12                   |
| Moderate intensity       |            |            |                         |                         |                         |                        |
| None                     | 223 (41.1) | 193 (35.5) | 1 (reference)           | 1 (reference)           | 1 (reference)           | 1 (reference)          |
| ≤840                     | 163 (30.0) | 163 (30.0) | 0.87(0.65-1.16)         | 0.89 (0.64-1.23)        | 0.89 (0.64-1.24)        | 0.91(0.65-1.26)        |
| >840                     | 157 (28.9) | 187 (34.4) | <b>0.73 (0.55-0.97)</b> | 0.80 (0.58-1.10)        | 0.81(0.59-1.12)         | 0.85(0.61-1.19)        |
| <i>P</i> value for trend |            |            | <b>0.03</b>             | 0.17                    | 0.21                    | 0.34                   |
| Vigorous intensity       |            |            |                         |                         |                         |                        |
| none                     | 432 (79.6) | 400 (73.7) | 1 (reference)           | 1 (reference)           | 1 (reference)           | 1 (reference)          |
| ≤960                     | 32 (5.9)   | 46(8.5)    | 0.64 (0.40-1.03)        | 0.70 (0.41-1.20)        | 0.70(0.41-1.20)         | 0.69(0.40-1.18)        |
| >960                     | 79 (14.5)  | 97 (17.9)  | 0.75 (0.54-1.05)        | <b>0.67 (0.47-0.97)</b> | <b>0.68 (0.47-0.98)</b> | <b>0.64(0.44-0.93)</b> |
| <i>P</i> value for trend |            |            | 0.04                    | <b>0.02</b>             | <b>0.02</b>             | <b>0.06</b>            |

NAFLD: Non-alcoholic fatty liver disease

Multivariate model 1: adjusted for BMI, hypertension, diabetes, and fasting blood glucose

Multivariate model 2: adjusted for BMI, hypertension, diabetes, fasting blood glucose and sedentary time.

Multivariate model 3: adjusted for BMI, hypertension, diabetes, fasting blood glucose, sedentary time and energy intake.

ORs = odds ratios, aOR= adjusted odds ratios, CIs = confidence intervals

Table S2. Association between physical activity and NAFLD in female

| Variable<br>(MET-minute/week) | Case<br>number | Control<br>number(%) | Univariate model<br>OR (95% CI) | Multivariate model 1<br>aOR (95% CI) | Multivariate model 2<br>aOR (95% CI) | Multivariate model 3<br>aOR (95% CI) |
|-------------------------------|----------------|----------------------|---------------------------------|--------------------------------------|--------------------------------------|--------------------------------------|
| Total amount of               |                |                      |                                 |                                      |                                      |                                      |
| ≤3010.2                       | 58 (33.7)      | 57 (33.1)            | 1 (reference)                   | 1 (reference)                        | 1 (reference)                        | 1 (reference)                        |
| 3010.2~5833.8                 | 65 (37.8)      | 58(33.7)             | 1.10(0.66-1.83)                 | 0.72 (0.40-1.30)                     | 0.73 (0.40-1.32)                     | 0.73(0.40-1.31)                      |
| >5833.8                       | 49(28.5)       | 57(33.1)             | 0.85 (0.50-1.43)                | 0.71 (0.39-1.30)                     | 0.73 (0.40-1.36)                     | 0.72(0.39-1.33)                      |
| <i>P</i> value for trend      |                |                      | 0.55                            | 0.27                                 | 0.32                                 | 0.29                                 |
| Light intensity               |                |                      |                                 |                                      |                                      |                                      |
| ≤1575                         | 57 (33.1)      | 60 (34.9)            | 1 (reference)                   | 1 (reference)                        | 1 (reference)                        | 1 (reference)                        |
| 1575~3150                     | 66(38.4)       | 66(38.4)             | 1.05 (0.64-1.73)                | 0.85(0.48-1.50)                      | 0.87 (0.49-1.55)                     | 0.88(0.50-1.57)                      |
| >3150                         | 49 (28.5)      | 46 (26.7)            | 1.12 (0.65-1.93)                | 0.75(0.40-1.41)                      | 0.77(0.41-1.48)                      | 0.76(0.40-1.46)                      |
| <i>P</i> value for trend      |                |                      | 0.68                            | 0.36                                 | 0.44                                 | 0.41                                 |
| Moderate intensity            |                |                      |                                 |                                      |                                      |                                      |
| ≤840                          | 72 (41.9)      | 67 (39)              | 1 (reference)                   | 1 (reference)                        | 1 (reference)                        | 1 (reference)                        |
| 840~1984.8                    | 50 (29.1)      | 48 (27.9)            | 0.97 (0.58-1.63)                | 0.81 (0.44-1.47)                     | 0.82 (0.45-1.51)                     | 0.82(0.45-1.50)                      |
| >1984.8                       | 50 (29.1)      | 57 (33.1)            | 0.82 (0.49-1.35)                | 0.78 (0.44-1.38)                     | 0.80 (0.45-1.42)                     | 0.80(0.45-1.43)                      |
| <i>P</i> value for trend      |                |                      | 0.44                            | 0.38                                 | 0.43                                 | 0.44                                 |
| Vigorous intensity            |                |                      |                                 |                                      |                                      |                                      |
| none                          | 160 (93)       | 149 (86.6)           | 1 (reference)                   | 1 (reference)                        | 1 (reference)                        | 1 (reference)                        |
| yes                           | 12 (7)         | 23 (13.4)            | 0.49 (0.23-1.01)                | 0.77 (0.34-1.76)                     | 0.77 (0.34-1.76)                     | 0.77(0.34-1.74)                      |

NAFLD: Non-alcoholic fatty liver disease

Multivariate model 1: adjusted for BMI, hypertension, diabetes, and fasting blood glucose

Multivariate model 2: adjusted for BMI, hypertension, diabetes, fasting blood glucose and sedentary time.

Multivariate model 3: adjusted for BMI, hypertension, diabetes, fasting blood glucose, sedentary time and energy intake.

ORs = odds ratios, aOR= adjusted odds ratios, CIs = confidence intervals

TableS3. the distribution of the three energy nutrients in the case and the control in males

| Variable                    | case                      | control                  | <i>z</i>     | <i>p</i>         |
|-----------------------------|---------------------------|--------------------------|--------------|------------------|
| Energy intake ( Kilojoule ) | 2456.70 (2074.46-2856.50) | 2364.34 (1933.76-2789.0) | <b>-2.42</b> | <b>0.02</b>      |
| Carbohydrate(g)             | 349.64 (276.77-429.11)    | 349.45 (261.89-427.34)   | -0.90        | 0.37             |
| Fat(g)                      | 79.37 (66.86-93.67)       | 71.97 (61.19-84.63)      | <b>-4.87</b> | <b>&lt;0.001</b> |
| Protein(g)                  | 77.96 (65.05-93.07)       | 75.00 (62.38-91.73)      | -2.00        | 0.05             |

TableS4. the distribution of the three energy nutrients in the case and the control in females

| Variable                    | case                     | control                  | <i>z</i>     | <i>p</i>         |
|-----------------------------|--------------------------|--------------------------|--------------|------------------|
| Energy intake ( Kilojoule ) | 1755.38(1540.99-2065.81) | 1669.87(1468.99-2014.09) | -1.71        | 0.09             |
| Carbohydrate(g)             | 228.70(183.64-270.82)    | 233.72(194.89-278.61)    | -1.19        | 0.23             |
| Fat(g)                      | 67.29(58.74-80.90)       | 57.90(49.91-67.89)       | <b>-5.45</b> | <b>&lt;0.001</b> |
| Protein(g)                  | 57.44(49.57-68.92)       | 57.07(47.44-68.26)       | -0.40        | 0.69             |



Table S5. Association between physical activity and NAFLD in male

| Variable           | Case       | Control    | Multivariate model 1    | Multivariate model 2    | Multivariate model3     | Multivariate model 4   |
|--------------------|------------|------------|-------------------------|-------------------------|-------------------------|------------------------|
| (MET-minute/week)  | number (%) | number(%)  | aOR (95% CI)            | aOR (95% CI)            | aOR (95% CI)            | aOR (95% CI)           |
| Total amount of    |            |            |                         |                         |                         |                        |
| ≤1440              | 153 (41.2) | 124 (33.4) | 1 (reference)           | 1 (reference)           | 1 (reference)           | 1 (reference)          |
| 1440~3180          | 104 (28.0) | 124(33.4)  | <b>0.62 (0.41-0.91)</b> | <b>0.62 (0.41-0.93)</b> | <b>0.60 (0.40-0.91)</b> | <b>0.61(0.41-0.91)</b> |
| >3180              | 114(30.7)  | 123(33.2)  | <b>0.60(0.40-0.91)</b>  | <b>0.61 (0.41-0.92)</b> | <b>0.58 (0.39-0.88)</b> | <b>0.60(0.40-0.89)</b> |
| P value for trend  |            |            | <b>0.01</b>             | <b>0.02</b>             | <b>0.01</b>             | <b>0.01</b>            |
| Light intensity    |            |            |                         |                         |                         |                        |
| ≤525               | 121 (32.6) | 125 (33.7) | 1 (reference)           | 1 (reference)           | 1 (reference)           | 1 (reference)          |
| 525~1500           | 127(34.2)  | 125(33.7)  | 1.03(0.69-1.55)         | 1.01(0.68-1.52)         | 1.05 (0.70-1.57)        | 1.02(0.68-1.52)        |
| >1500              | 123 (33.2) | 121 (32.6) | 0.95(0.63-1.44)         | 0.96(0.64-1.45)         | 0.94(0.62-1.41)         | 0.94(0.63-1.42)        |
| P value for trend  |            |            | 0.82                    | 0.85                    | 0.75                    | 0.79                   |
| Moderate intensity |            |            |                         |                         |                         |                        |
| None               | 204 (55)   | 170 (45.8) | 1 (reference)           | 1 (reference)           | 1 (reference)           | 1 (reference)          |
| ≤684               | 74 (19.9)  | 79 (21.3)  | 0.78(0.51-1.20)         | 0.79 (0.51-1.20)        | 0.79 (0.51-1.22)        | 0.78(0.51-1.20)        |
| >684               | 93 (25.1)  | 122 (32.9) | <b>0.58(0.40-0.86)</b>  | <b>0.58 (0.39-0.86)</b> | <b>0.60(0.40-0.88)</b>  | <b>0.58(0.40-0.86)</b> |
| P value for trend  |            |            | <b>0.01</b>             | <b>0.01</b>             | <b>0.01</b>             | <b>0.01</b>            |
| Vigorous intensity |            |            |                         |                         |                         |                        |
| none               | 272 (73.3) | 251 (67.7) | 1 (reference)           | 1 (reference)           | 1 (reference)           | 1 (reference)          |
| ≤960               | 28 (7.5)   | 35(9.4)    | 0.77(0.42-1.41)         | 0.78(0.42-1.43)         | 0.77(0.39-1.30)         | 0.76(0.41-1.39)        |
| >960               | 71 (19.1)  | 85 (22.9)  | <b>0.63(0.41-0.95)</b>  | <b>0.64 (0.43-0.97)</b> | <b>0.61(0.40-0.92)</b>  | <b>0.62(0.41-0.93)</b> |
| P value for trend  |            |            | <b>0.02</b>             | <b>0.03</b>             | <b>0.02</b>             | <b>0.02</b>            |

NAFLD: Non-alcoholic fatty liver disease

Multivariate model 1: adjusted for BMI, hypertension, diabetes, fasting blood glucose, sedentary time and total energy intake

Multivariate model 2: adjusted for BMI, hypertension, diabetes, fasting blood glucose, sedentary time and carbohydrate

Multivariate model 3: adjusted for BMI, hypertension, diabetes, fasting blood glucose, sedentary time and fat

Multivariate model 4: adjusted for BMI, hypertension, diabetes, fasting blood glucose, sedentary time and protein

ORs = odds ratios, aOR= adjusted odds ratios, CIs = confidence intervals

Table S6. Association between physical activity and NAFLD in female

| Variable                 | Case      | Control    | Multivariate model 1 | Multivariate model 2 | Multivariate model3 | Multivariate model 4 |
|--------------------------|-----------|------------|----------------------|----------------------|---------------------|----------------------|
| (MET-minute/week)        | number    | number(%)  | aOR (95% CI)         | aOR (95% CI)         | aOR (95% CI)        | aOR (95% CI)         |
| Total amount of          |           |            |                      |                      |                     |                      |
| ≤3010.2                  | 58 (33.7) | 57 (33.1)  | 1 (reference)        | 1 (reference)        | 1 (reference)       | 1 (reference)        |
| 3010.2~5833.8            | 65 (37.8) | 58(33.7)   | 0.73(0.40-1.31)      | 0.74 (0.41-1.35)     | 0.80 (0.44-1.48)    | 0.73(0.40-1.32)      |
| >5833.8                  | 49(28.5)  | 57(33.1)   | 0.72(0.39-1.33)      | 0.75 (0.41-1.40)     | 0.75 (0.40-1.40)    | 0.74(0.40-1.36)      |
| <i>P</i> value for trend |           |            | 0.29                 | 0.38                 | 0.37                | 0.32                 |
| Light intensity          |           |            |                      |                      |                     |                      |
| ≤1575                    | 57 (33.1) | 60 (34.9)  | 1 (reference)        | 1 (reference)        | 1 (reference)       | 1 (reference)        |
| 1575~3150                | 66(38.4)  | 66(38.4)   | 0.88(0.50-1.57)      | 0.87(0.49-1.56)      | 1.02 (0.56-1.84)    | 0.86(0.48-1.54)      |
| >3150                    | 49 (28.5) | 46 (26.7)  | 0.76(0.40-1.46)      | 0.80(0.42-1.52)      | 0.80(0.41-1.55)     | 0.77(0.41-1.48)      |
| <i>P</i> value for trend |           |            | 0.41                 | 0.36                 | 0.53                | 0.43                 |
| Moderate intensity       |           |            |                      |                      |                     |                      |
| ≤840                     | 72 (41.9) | 67 (39)    | 1 (reference)        | 1 (reference)        | 1 (reference)       | 1 (reference)        |
| 840~1984.8               | 50 (29.1) | 48 (27.9)  | 0.82(0.45-1.50)      | 0.84 (0.46-1.53)     | 0.87(0.47-1.61)     | 0.79(0.44-1.41)      |
| >1984.8                  | 50 (29.1) | 57 (33.1)  | 0.80(0.45-1.43)      | 0.80 (0.45-1.43)     | 0.87 (0.48-1.56)    | 1.00(0.99-1.01)      |
| <i>P</i> value for trend |           |            | 0.44                 | 0.45                 | 0.63                | 0.42                 |
| Vigorous intensity       |           |            |                      |                      |                     |                      |
| none                     | 160 (93)  | 149 (86.6) | 1 (reference)        | 1 (reference)        | 1 (reference)       | 1 (reference)        |
| yes                      | 12 (7)    | 23 (13.4)  | 0.77(0.34-1.74)      | 0.77 (0.34-1.75)     | 0.72 (0.31-1.66)    | 0.78(0.34-1.79)      |

NAFLD: Non-alcoholic fatty liver disease

Multivariate model 1: adjusted for BMI, hypertension, diabetes, fasting blood glucose, sedentary time and total energy intake

Multivariate model 2: adjusted for BMI, hypertension, diabetes, fasting blood glucose, sedentary time and carbohydrate

Multivariate model 3: adjusted for BMI, hypertension, diabetes, fasting blood glucose, sedentary time and fat

Multivariate model 4: adjusted for BMI, hypertension, diabetes, fasting blood glucose, sedentary time and protein

ORs = odds ratios, aOR= adjusted odds ratios, CIs = confidence intervals

STROBE Statement—Checklist of items that should be included in reports of *case-control studies*

|                              | Item No | Recommendation                                                                                                                                                                                    | Page No |
|------------------------------|---------|---------------------------------------------------------------------------------------------------------------------------------------------------------------------------------------------------|---------|
| <b>Title and abstract</b>    | 1       | (a) Indicate the study's design with a commonly used term in the title or the abstract                                                                                                            | 2       |
|                              |         | (b) Provide in the abstract an informative and balanced summary of what was done and what was found                                                                                               | 2       |
| <b>Introduction</b>          |         |                                                                                                                                                                                                   |         |
| Background/rationale         | 2       | Explain the scientific background and rationale for the investigation being reported                                                                                                              | 3-4     |
| Objectives                   | 3       | State specific objectives, including any prespecified hypotheses                                                                                                                                  | 4       |
| <b>Methods</b>               |         |                                                                                                                                                                                                   |         |
| Study design                 | 4       | Present key elements of study design early in the paper                                                                                                                                           | 5       |
| Setting                      | 5       | Describe the setting, locations, and relevant dates, including periods of recruitment, exposure, follow-up, and data collection                                                                   | 5       |
| Participants                 | 6       | (a) Give the eligibility criteria, and the sources and methods of case ascertainment and control selection. Give the rationale for the choice of cases and controls                               | 5-6     |
|                              |         | (b) For matched studies, give matching criteria and the number of controls per case                                                                                                               | 5       |
| Variables                    | 7       | Clearly define all outcomes, exposures, predictors, potential confounders, and effect modifiers. Give diagnostic criteria, if applicable                                                          | 6-8     |
| Data sources/<br>measurement | 8*      | For each variable of interest, give sources of data and details of methods of assessment (measurement). Describe comparability of assessment methods if there is more than one group              | 6-8     |
| Bias                         | 9       | Describe any efforts to address potential sources of bias                                                                                                                                         | 17      |
| Study size                   | 10      | Explain how the study size was arrived at                                                                                                                                                         | 5       |
| Quantitative variables       | 11      | Explain how quantitative variables were handled in the analyses. If applicable, describe which groupings were chosen and why                                                                      | 6-8     |
| Statistical methods          | 12      | (a) Describe all statistical methods, including those used to control for confounding                                                                                                             | 9       |
|                              |         | (b) Describe any methods used to examine subgroups and interactions                                                                                                                               |         |
|                              |         | (c) Explain how missing data were addressed                                                                                                                                                       |         |
|                              |         | (d) If applicable, explain how matching of cases and controls was addressed                                                                                                                       | 5       |
|                              |         | (e) Describe any sensitivity analyses                                                                                                                                                             |         |
| <b>Results</b>               |         |                                                                                                                                                                                                   |         |
| Participants                 | 13*     | (a) Report numbers of individuals at each stage of study—eg numbers potentially eligible, examined for eligibility, confirmed eligible, included in the study, completing follow-up, and analysed | 9       |
|                              |         | (b) Give reasons for non-participation at each stage                                                                                                                                              | 6       |
|                              |         | (c) Consider use of a flow diagram                                                                                                                                                                |         |
| Descriptive data             | 14*     | (a) Give characteristics of study participants (eg demographic, clinical, social) and information on exposures and potential confounders                                                          | 10      |
|                              |         | (b) Indicate number of participants with missing data for each variable of interest                                                                                                               | 10      |
| Outcome data                 | 15*     | Report numbers in each exposure category, or summary measures of exposure                                                                                                                         | 12-13   |

|    |                          |    |                                                                                                                                                                                                              |
|----|--------------------------|----|--------------------------------------------------------------------------------------------------------------------------------------------------------------------------------------------------------------|
| 1  |                          |    |                                                                                                                                                                                                              |
| 2  |                          |    |                                                                                                                                                                                                              |
| 3  | Main results             | 16 | (a) Give unadjusted estimates and, if applicable, confounder-adjusted estimates and their precision (eg, 95% confidence interval). Make clear which confounders were adjusted for and why they were included |
| 4  |                          |    | 11-14                                                                                                                                                                                                        |
| 5  |                          |    |                                                                                                                                                                                                              |
| 6  |                          |    |                                                                                                                                                                                                              |
| 7  |                          |    |                                                                                                                                                                                                              |
| 8  |                          |    |                                                                                                                                                                                                              |
| 9  |                          |    |                                                                                                                                                                                                              |
| 10 |                          |    |                                                                                                                                                                                                              |
| 11 |                          |    |                                                                                                                                                                                                              |
| 12 |                          |    |                                                                                                                                                                                                              |
| 13 |                          |    |                                                                                                                                                                                                              |
| 14 |                          |    |                                                                                                                                                                                                              |
| 15 |                          |    |                                                                                                                                                                                                              |
| 16 | <b>Discussion</b>        |    |                                                                                                                                                                                                              |
| 17 | Key results              | 18 | Summarise key results with reference to study objectives                                                                                                                                                     |
| 18 |                          |    | 15                                                                                                                                                                                                           |
| 19 | Limitations              | 19 | Discuss limitations of the study, taking into account sources of potential bias or imprecision. Discuss both direction and magnitude of any potential bias                                                   |
| 20 |                          |    | 17-18                                                                                                                                                                                                        |
| 21 | Interpretation           | 20 | Give a cautious overall interpretation of results considering objectives, limitations, multiplicity of analyses, results from similar studies, and other relevant evidence                                   |
| 22 |                          |    | 14-16                                                                                                                                                                                                        |
| 23 | Generalisability         | 21 | Discuss the generalisability (external validity) of the study results                                                                                                                                        |
| 24 |                          |    | 17                                                                                                                                                                                                           |
| 25 | <b>Other information</b> |    |                                                                                                                                                                                                              |
| 26 | Funding                  | 22 | Give the source of funding and the role of the funders for the present study and, if applicable, for the original study on which the present article is based                                                |
| 27 |                          |    | 19                                                                                                                                                                                                           |
| 28 |                          |    |                                                                                                                                                                                                              |

\*Give information separately for cases and controls.

**Note:** An Explanation and Elaboration article discusses each checklist item and gives methodological background and published examples of transparent reporting. The STROBE checklist is best used in conjunction with this article (freely available on the Web sites of PLoS Medicine at <http://www.plosmedicine.org/>, Annals of Internal Medicine at <http://www.annals.org/>, and Epidemiology at <http://www.epidem.com/>). Information on the STROBE Initiative is available at <http://www.strobe-statement.org>.

# BMJ Open

## The dose-response association between physical activity and non-alcoholic fatty liver disease: a case-control study in a Chinese population

|                                 |                                                                                                                                                                                                                                                                                                                                                                                                                                                                                                                                                                                                                                                                                                                                                                                                                                                                                                                                                                                                                                                                                                                                                                                                                                                                                                                                                                                                                                                                                                                                                                       |
|---------------------------------|-----------------------------------------------------------------------------------------------------------------------------------------------------------------------------------------------------------------------------------------------------------------------------------------------------------------------------------------------------------------------------------------------------------------------------------------------------------------------------------------------------------------------------------------------------------------------------------------------------------------------------------------------------------------------------------------------------------------------------------------------------------------------------------------------------------------------------------------------------------------------------------------------------------------------------------------------------------------------------------------------------------------------------------------------------------------------------------------------------------------------------------------------------------------------------------------------------------------------------------------------------------------------------------------------------------------------------------------------------------------------------------------------------------------------------------------------------------------------------------------------------------------------------------------------------------------------|
| Journal:                        | <i>BMJ Open</i>                                                                                                                                                                                                                                                                                                                                                                                                                                                                                                                                                                                                                                                                                                                                                                                                                                                                                                                                                                                                                                                                                                                                                                                                                                                                                                                                                                                                                                                                                                                                                       |
| Manuscript ID                   | bmjopen-2018-026854.R2                                                                                                                                                                                                                                                                                                                                                                                                                                                                                                                                                                                                                                                                                                                                                                                                                                                                                                                                                                                                                                                                                                                                                                                                                                                                                                                                                                                                                                                                                                                                                |
| Article Type:                   | Research                                                                                                                                                                                                                                                                                                                                                                                                                                                                                                                                                                                                                                                                                                                                                                                                                                                                                                                                                                                                                                                                                                                                                                                                                                                                                                                                                                                                                                                                                                                                                              |
| Date Submitted by the Author:   | 08-Feb-2019                                                                                                                                                                                                                                                                                                                                                                                                                                                                                                                                                                                                                                                                                                                                                                                                                                                                                                                                                                                                                                                                                                                                                                                                                                                                                                                                                                                                                                                                                                                                                           |
| Complete List of Authors:       | li, yangfan; Department of Epidemiology and Health Statistics, Fujian Provincial Key Laboratory of Environment Factors and Cancer, School of Public Health, Fujian Medical University, Fujian, China<br>He, Fei; Department of Epidemiology and Health Statistics, Fujian Provincial Key Laboratory of Environment Factors and Cancer, School of Public Health, Fujian Medical University, Fujian, China<br>he, yun; Key Laboratory of Ministry of Education for Gastrointestinal Cancer, Fujian Medical University, Fujian, China<br>pan, xinting; Department of Epidemiology and Health Statistics, Fujian Provincial Key Laboratory of Environment Factors and Cancer, School of Public Health, Fujian Medical University, Fujian, China<br>wu, yunli; Key Laboratory of Ministry of Education for Gastrointestinal Cancer, Fujian Medical University, Fujian, China<br>hu, zhijian; Department of Epidemiology and Health Statistics, Fujian Provincial Key Laboratory of Environment Factors and Cancer, School of Public Health, Fujian Medical University, Fujian, China<br>lin, xu; Key Laboratory of Ministry of Education for Gastrointestinal Cancer, Fujian Medical University, Fujian, China<br>xu, shanghai; Department of Cardiology, Affiliated Nanping First Hospital, Fujian Medical University, Nanping, China<br>Peng, Xian-E; Fujian Medical University, Department of Epidemiology and Health Statistics, Fujian Provincial Key Laboratory of Environment Factors and Cancer, School of Public Health, Fujian Medical University, Fujian, China |
| <b>Primary Subject Heading</b>: | Gastroenterology and hepatology                                                                                                                                                                                                                                                                                                                                                                                                                                                                                                                                                                                                                                                                                                                                                                                                                                                                                                                                                                                                                                                                                                                                                                                                                                                                                                                                                                                                                                                                                                                                       |
| Secondary Subject Heading:      | Sports and exercise medicine                                                                                                                                                                                                                                                                                                                                                                                                                                                                                                                                                                                                                                                                                                                                                                                                                                                                                                                                                                                                                                                                                                                                                                                                                                                                                                                                                                                                                                                                                                                                          |
| Keywords:                       | Lipid disorders < DIABETES & ENDOCRINOLOGY, Hepatology < INTERNAL MEDICINE, PUBLIC HEALTH, SPORTS MEDICINE                                                                                                                                                                                                                                                                                                                                                                                                                                                                                                                                                                                                                                                                                                                                                                                                                                                                                                                                                                                                                                                                                                                                                                                                                                                                                                                                                                                                                                                            |
|                                 |                                                                                                                                                                                                                                                                                                                                                                                                                                                                                                                                                                                                                                                                                                                                                                                                                                                                                                                                                                                                                                                                                                                                                                                                                                                                                                                                                                                                                                                                                                                                                                       |

SCHOLARONE™  
Manuscripts

1  
2  
3  
4  
5  
6  
7  
8  
9  
10  
11  
12  
13  
14  
15  
16  
17  
18  
19  
20  
21  
22  
23  
24  
25  
26  
27  
28  
29  
30  
31  
32  
33  
34  
35  
36  
37  
38  
39  
40  
41  
42  
43  
44  
45  
46  
47  
48  
49  
50  
51  
52  
53  
54  
55  
56  
57  
58  
59  
60

1  
2  
3  
4  
5 ***The dose-response association between physical activity and***  
6 ***non-alcoholic fatty liver disease: a case-control study in a***  
7 ***Chinese population***  
8  
9  
10  
11  
12  
13  
14

15 YangFan Li<sup>1¶</sup>, Fei He<sup>1¶</sup>, Yun He<sup>2</sup>, XinTing Pan <sup>1</sup>, Yunli Wu<sup>2</sup>, ZhiJian Hu <sup>1</sup>, Xu  
16  
17  
18 Lin<sup>2</sup>,  
19  
20  
21 ShangHua Xu <sup>3\*</sup> and XianE Peng <sup>1,2\*</sup>  
22  
23

24 <sup>1</sup> Department of Epidemiology and Health Statistics, Fujian Provincial Key  
25  
26 Laboratory of Environment Factors and Cancer, School of Public Health, Fujian  
27  
28 Medical University, Fujian, China;  
29  
30

31  
32 <sup>2</sup> Key Laboratory of Ministry of Education for Gastrointestinal Cancer, Fujian  
33  
34 Medical University, Fujian, China;  
35  
36

37  
38 <sup>3</sup> Department of Cardiology, Affiliated Nanping First Hospital, Fujian Medical  
39  
40 University, Nanping, China  
41  
42

43 ¶ Both authors contributed equally to this work.  
44

45  
46 \* Correspondence: [fmuxe@163.com](mailto:fmuxe@163.com) (X.E.P.) or  
47  
48 [13365998866@163.com](mailto:13365998866@163.com)(S.H.X.);  
49  
50

51  
52 Word count: 3109  
53  
54  
55  
56  
57  
58  
59  
60

---

**Running title:** Exercise and non-alcoholic fatty liver disease**Abstract**

**Aim:** Physical activity plays an important role in the development of non-alcoholic fatty liver disease (NAFLD). However, the optimal intensity and dose of physical activity for the treatment of NAFLD have yet to be found. In the present study, we aimed to provide a dose-response association between physical activity and NAFLD in a Chinese population.

**Methods:** We recruited 543 patients with NAFLD diagnosed by abdominal ultrasonography, and 543 age- and sex-matched controls. The amount of physical activity, sedentary time and energy intake was collected through a structured questionnaire. Logistic regression analyses were performed to investigate the association between physical activity and NAFLD.

**Results:** After adjusting for hypertension, diabetes, body mass index (BMI), fasting blood glucose, energy intake and sedentary time, the total amount of physical activity was found to be inversely associated with NAFLD in a dose-dependent manner in males. (>3180 MET-min/week vs. ≤1440 MET-min/week: OR=0.60, 95% CI=0.40-0.91, *P* for trend=0.01). In addition, both moderate- and vigorous-intensity physical activity were effective in reducing the risk of NAFLD, independent of confounding variables in males (Moderate-intensity physical activity: >684 MET-min/week vs. none: OR=0.58, 95%CI= 0.40-0.86, *P* for trend=0.01; Vigorous-intensity physical activity: >960 MET-min/week vs. none: OR=0.63, 95%CI=0.41-0.95, *P* for trend=0.02).

**Conclusions:** Physical activity was inversely associated with risk of NAFLD in a



dose-dependent manner in males. Vigorous- and moderate-intensity physical activity were both beneficial to NAFLD, independent of sedentary time and energy intake.

**Key words:** Energy intake; Metabolic Equivalent of energy ; non-alcoholic fatty liver disease; physical activity

### **Strengths and limitations of this study**

- This study had a considerable sample size and several potential confounding variables such as energy intake and sedentary time, were taken into account.
- The intensity of physical activity was measured in terms of Metabolic Equivalent of energy (MET) and dose of physical activity was presented in the form of MET-min/week
- This study was a case-control design, thus the causal association between physical activity and NAFLD could not be precisely identified.
- This study was a case-control study , recall bias was inevitable and randomized controlled trial studies are therefore required for more accurate results.

### **Introduction**

Non-alcoholic fatty liver disease (NAFLD) is defined as fat accumulation in more than 5% of hepatocytes, without competing liver disease such as viral hepatitis or autoimmune hepatitis.

[1]It encompass a broad spectrum of hepatic dysfunction ranging from simple hepatic lipid accumulation (steatosis) to non-alcoholic steatohepatitis (NASH), fibrosis, cirrhosis and finally hepatocellular carcinoma.[2] A meta-analysis indicated that 25.24% of global population have NAFLD, [3] similar to the prevalence rate in China of 20%.[4]Observation studies showed that

1  
2  
3  
4 patients with NAFLD have a higher risk of developing extrahepatic complications such as  
5  
6 cardiovascular disease, diabetes and metabolic syndrome. [5-7] Therefore, NAFLD is recognized as  
7  
8 a global health burden and it is crucial to explore effective prevention and treatment strategies.  
9

10  
11 Physical activity as a lifestyle modification plays an important role in the development of  
12  
13 NAFLD. Previous studies found an inverse relationship between physical activity and the risk of  
14  
15 NAFLD, [8-9] and randomized controlled trials also demonstrated that physical activity improved  
16  
17 liver enzyme function and reduced fat accumulation. [10-13] A meta-analysis of 20 RCTs showed  
18  
19 that levels of alanine aminotransferase (ALT), gamma-glutamyltranspeptidase (GGT), aspartate  
20  
21 aminotransferase (AST), and intrahepatic fat of the intervention group were significantly better  
22  
23 than the control group. [14] However, physical activity is a complex concept and includes type,  
24  
25 intensity, frequency and duration. Many studies only consider the frequency of physical activity,  
26  
27 and this does not reflect the dose. In addition, most studies had a limited sample size and the data  
28  
29 on physical activity was retrieved from populations with diverse demographic characteristics.  
30  
31 Therefore, the optimal intensity and dose of physical activity for the treatment of NAFLD have  
32  
33 yet to be found. For example, a report from the Korean suggested that exercising more than twice  
34  
35 a week and for more than 30 minutes can decrease the risk of hepatic steatosis. [15] Another study,  
36  
37 from America, found that moderate-intensity exercise might reduce the risk of hepatic steatosis,  
38  
39 but did not make a specific recommendation about the desired. [16]  
40  
41  
42  
43  
44  
45  
46  
47  
48  
49

50  
51 In the present study, Metabolic Equivalent of Energy (MET) was used as a measure of  
52  
53 physical activity. We aimed to explore the dose-response relationship between physical activity  
54  
55 and NAFLD in a Chinese population, taking into consideration confounding variables such as  
56  
57  
58  
59

energy intake and sedentary time.

## Methods

### *Patient and Public Involvement*

This study is a case-control design focused on a Chinese Han population between 18 and 70 years old. Subjects were recruited from a health examination center of Nanping First Affiliated Hospital of Fujian Medical University from October 2015 to September 2017. All subjects underwent abdominal ultrasound and blood biochemical tests. Once cases and controls have been linked to the NAFLD, a letter of invitation and information about the study will be sent to each potential case and control to obtain consent. Eligible subjects will be interviewed face-to-face by investigators to collect data. The study was approved by the local ethics committees of Fujian Medical University (ethics number 2014096). In addition, all methods were performed in accordance with the relevant guidelines and regulations.

### *Sample size calculation*

This study is a case-control design, thus we estimate the sample size based on the Case-control study formula for 1:1 frequency matching. By consulting the literature,<sup>[17]</sup> we estimate OR=0.7,  $p_0=0.6$ . The calculated sample size was  $N_{\text{case}}=508=508$ . Finally 1086 subjects (543 cases and 543 controls) were recruited in this study.

### *Outcome—eligibility of NAFLD cases and controls*

NAFLD was diagnosed by the presence of at least two of the following three abnormal findings on abdominal ultrasonography: <sup>[18]</sup>(1) increased echogenicity of the liver near-field

1  
2  
3  
4 region with deep attenuation of the ultrasound signal; (2) hyperechogenicity of liver tissue (“bright  
5  
6 liver”), as often compared to hypoechogenicity of the kidney cortex; and (3) vascular blurring.  
7  
8  
9 Exclusion criteria were as follows: (1) alcohol consumption >140 g/week for men and >70 g/week  
10  
11 for women; (2) presence of hepatitis B surface antigen or hepatitis C antibodies; (3) use of  
12  
13 hepatotoxic drugs (such as tamoxifen, amiodarone, valproate and methotrexate) [19] which can  
14  
15 induce hepatic fat accumulation; (4) hepatic disease which can induce hepatic fat accumulation;  
16  
17  
18 (5) hepatic disease such as Wilson’s disease, autoimmune hepatitis and hemochromatosis. A total  
19  
20 of 543 newly-diagnosed NAFLD patients were enrolled; and 543 controls were selected by  
21  
22 frequency-matching according to age ( $\pm 5$  years) and gender from a healthy population who  
23  
24  
25 underwent abdominal ultrasonography examination during the same period.  
26  
27  
28

### 30 *Exposure—physical activity measurements*

31  
32 Physical activity during the past seven days was quantified through a questionnaire based  
33  
34 on the International Physical Activity Questionnaire, adapted to the characteristics of Nanping  
35  
36 residents.[20] It includes four domains (transportation-related, work-related, household-related and  
37  
38 leisure time-related). Each domain includes specific activities which correspond to various  
39  
40 intensities of exercise (light-, moderate- and vigorous-intensity). Participants were asked to  
41  
42 estimate information on the frequency and duration spent in specific activities during the past  
43  
44 seven days. Sedentary time was measured by the single question, “During the past seven days,  
45  
46 how much time did you usually spend sitting on a day?”  
47  
48  
49  
50  
51

52  
53 The intensity of physical activity was defined in terms of Metabolic Equivalent of Energy  
54  
55 (MET). According to a standard reference, each kind of activity was assigned a specific MET  
56  
57  
58  
59

value: low-intensity physical activities were defined as <3METs, moderate-intensity activities defined as 3~6 METs and vigorous-intensity activities defined as >6METs.<sup>[21]</sup> The dose of specific physical activity was quantified by the frequency and duration and presented in the form of MET-minutes per week (MET-min/week = duration X frequency per week X MET value). The total dose of physical activity equals the sum of the doses for each specific activity.

### ***Potential confounders***

Face-to-face investigation was performed by uniformly trained investigators. Data were collected in the following four categories, using a structured questionnaire for the first two:

(1) Demographic characteristics including age, gender, education, income, marriage status and history of diabetes).

(2) Health-related behaviors including smoking status, alcohol drinking, tea consumption, total energy intake.

Total energy intake was assessed by semi-quantitative food frequency questionnaire (FFQ),<sup>[22]</sup> which had been specifically developed and validated for the southern Chinese population.<sup>[23]</sup> Participants were asked to estimate information on the average frequency of consumption of selected foods and the estimated portion size over the previous year, ignoring any recent changes. Intakes of food were converted into g per day. Each food item was assigned a specific energy according to Food Nutrition Facts Table and total energy intake was the sum of the energy of various foods ingested in a day.<sup>[24]</sup>

Smokers were defined as those who had smoked at least one cigarette per day during the previous six months. Tea consumption was defined as drinking one or more cups of tea per day

1  
2  
3  
4 during the previous six months.

5  
6 (3) Anthropometric assessment including height, body weight and blood pressure.

7  
8  
9 Body mass index (BMI) was calculated as body weight (kg)/height<sup>2</sup> (m<sup>2</sup>), and classified into  
10 four categories: lean  $\leq 18.5$  kg/m<sup>2</sup>, normal: 18.6–23.9 kg/m<sup>2</sup>, overweight: 24.0–27.9 kg/m<sup>2</sup>, obese:  $\geq 28.0$   
11 kg/m<sup>2</sup>. [25]

12  
13  
14 For blood pressure measurement, participants were first asked to rest for 10 min. Then, the  
15 trained investigators measured blood pressure twice on seated participants using a standard  
16 mercury sphygmomanometer, and the mean of the two measurements was considered as the  
17 participant's blood pressure. Hypertension was defined as systolic arterial blood pressure(SABP)  
18  $\geq 140$  mmHg or diastolic arterial blood pressure(DABP)  $\geq 90$  mmHg. [26]

19  
20  
21 (4) Biochemical examinations after a 12-hour overnight fast

22  
23 Biochemical parameters including serum aspartate aminotransferase (AST), alanine  
24 aminotransferase(ALT), gamma-glutamyltranspeptidase(GGT), serum fasting glucose(FBG),  
25 total cholesterol(TC), triglycerides(TG), low-density lipoprotein(LDL), high-density  
26 lipoprotein(HDL).

27  
28 Blood samples were collected between 8:00 and 10:00 a.m. after fasting overnight (12 h).  
29  
30 Blood biochemical analysis was carried out by the medical laboratory department of Nanping  
31 First Affiliated Hospital of Fujian Medical University.

32  
33  
34  
35  
36  
37  
38  
39  
40  
41  
42  
43  
44  
45  
46  
47  
48  
49  
50  
51 **Statistical analysis**

52  
53  
54 The chi-square test was used to assess categorical variables and the Mann-Whitney U-test

1  
2  
3  
4 was used for continuous variables. An unconditional logistic regression model was employed to  
5  
6 progressively reduce the confounding effect of the relationship between physical activity and  
7  
8 NAFLD risk. The Bivariate spearman correlation was conducted to explore the association  
9  
10 between physical activity and biochemical parameters. All statistical analyses were conducted  
11  
12 using SPSS 23.0. The P-value was defined as two-tailed and set at  $< 0.05$ .  
13  
14  
15

## 16 17 **Results**

18  
19  
20  
21 A total of 1086 subjects (543 cases and 543 controls) were recruited. 742 (68.3%) were male,  
22  
23 344 (3.7%) were female. Baseline characteristics are shown in Table 1. The prevalence of  
24  
25 hypertension (30.0 %), overweight or obesity (66.5%) and diabetes (4.8%) were higher in  
26  
27 Subjects with NAFLD (each  $P<0.05$ ). And they tend to have tea consumption ( $P=0.04$ ). Serum  
28  
29 levels of GGT, ALT, AST, TC, TG, and FBG were also higher than in the control population  
30  
31 (each  $P<0.05$ ). Whereas HDL were lower in the cases ( $P<0.05$ ). There was no difference in age,  
32  
33 gender, income, marriage status, smoking status, education level, sedentary time or serum level  
34  
35 of LDL between the two groups.  
36  
37  
38  
39  
40  
41  
42  
43  
44  
45  
46  
47  
48  
49  
50  
51  
52  
53  
54  
55  
56  
57  
58  
59  
60

Table 1. Baseline characteristics of cases and controls

| Variable                    | case                             | control                          | Z/ $\chi^2$ | P       |
|-----------------------------|----------------------------------|----------------------------------|-------------|---------|
|                             | Number(%), or median (quartiles) | Number(%), or median (quartiles) |             |         |
| Age (years)                 | 48 (39-54)                       | 48 (39-54)                       | -0.03       | 0.97    |
| Gender                      |                                  |                                  | <           | 1       |
| Male                        | 371 (68.3)                       | 371 (68.3)                       |             |         |
| Female                      | 172 (31.7)                       | 172 (31.7)                       |             |         |
| Blood pressure (mm/Hg)      |                                  |                                  | 20.60       | < 0.001 |
| <140/90                     | 380 (70.0)                       | 444 (81.8)                       |             |         |
| ≥140/90                     | 163 (30.0)                       | 99 (18.2)                        |             |         |
| BMI (kg/m <sup>2</sup> )    |                                  |                                  | 208.5       | < 0.001 |
| ≤18.5                       | 3 (0.6)                          | 20 (3.7)                         |             |         |
| 18.6–23.9                   | 179 (33.0)                       | 388 (71.5)                       |             |         |
| 24.0–27.9                   | 284 (52.3)                       | 129 (23.8)                       |             |         |
| ≥28.0                       | 77 (14.2)                        | 6 (1.1)                          |             |         |
| Diabetes                    |                                  |                                  | 5.35        | 0.02    |
| No                          | 517 (95.2)                       | 531 (97.8)                       |             |         |
| Yes                         | 26 (4.8)                         | 12 (2.2)                         |             |         |
| Education level             |                                  |                                  | 5.52        | 0.06    |
| Primary education           | 274 (50.5)                       | 286 (52.7)                       |             |         |
| Secondary education         | 158 (29.1)                       | 126 (23.2)                       |             |         |
| Bachelor degree             | 111 (20.4)                       | 131 (24.1)                       |             |         |
| Income (¥)                  |                                  |                                  | 1.44        | 0.49    |
| <1000                       | 33 (6.1)                         | 35 (6.4)                         |             |         |
| 1000–2000                   | 161 (29.7)                       | 178 (32.8)                       |             |         |
| ≥2000                       | 349 (64.3)                       | 330 (60.8)                       |             |         |
| Tea consumption             |                                  |                                  | 4.40        | 0.04    |
| No                          | 338 (62.2)                       | 239 (44.0)                       |             |         |
| Yes                         | 205 (37.8)                       | 304 (56.0)                       |             |         |
| Smoking habit               |                                  |                                  | 0.24        | 0.62    |
| No                          | 140 (25.8)                       | 131 (24.1)                       |             |         |
| Yes                         | 403 (74.2)                       | 412 (75.9)                       |             |         |
| Marital status              |                                  |                                  | 2.65        | 0.10    |
| Single or divorced          | 53 (9.8)                         | 70 (12.9)                        |             |         |
| Married                     | 490 (90.2)                       | 473 (87.1)                       |             |         |
| Sedentary time (hours/day)  |                                  |                                  | 2.98        | 0.23    |
| <4                          | 167 (30.8)                       | 184 (33.9)                       |             |         |
| 4–8                         | 250 (46.0)                       | 255 (47.0)                       |             |         |
| ≥8                          | 126 (23.2)                       | 104 (19.2)                       |             |         |
| Energy intake ( Kilojoule ) | 2227.34 (1778.78-2664.85)        | 2106.85(1696.41-2600.52)         | -2.32       | 0.02    |
| GGT (IU/L)                  | 32(23.00-45.00)                  | 23(17.00-32.00)                  | -10.1       | < 0.001 |
| ALT (IU/L)                  | 27(20.00-38.00)                  | 20(15.00-25.00)                  | -11.4       | < 0.001 |
| AST (IU/L)                  | 24(20.00-28.00)                  | 22(18.00-25.00)                  | -5.69       | < 0.001 |
| TC (mmol/L)                 | 5.19 (4.64-5.77)                 | 5.03(4.53-5.53)                  | -2.76       | 0.06    |
| TG (mmol/L)                 | 1.85 (1.29-2.54)                 | 1.18(0.87-1.59)                  | -13.4       | < 0.001 |
| FBG (mmol/L)                | 5.37 (5.03-5.84)                 | 5.20(4.90-5.53)                  | -6.16       | < 0.001 |
| HDL (mmol/L)                | 1.21 (1.06-1.37)                 | 1.34(1.18-1.48)                  | -9.16       | < 0.001 |
| LDL (mmol/L)                | 3.27 (2.63-3.79)                 | 3.17(2.68-3.74)                  | -0.61       | 0.54    |



1  
2  
3 AST=serum aspartate aminotransferase, ALT=alanine aminotransferase, GGT= gamma-glutamyltranspeptidase, FBG=serum fasting glucose, TC=total cholesterol,  
4 TG=triglycerides, LDL=low-density lipoprotein,HDL=high-density lipoprotein, BMI=body mass index  
5

6 In total population, there is no significant dose-response association between physical  
7 activity and NAFLD after adjusting for BMI, hypertension, diabetes, fasting blood glucose,  
8 energy intake and sedentary time (table s1). Because the prevalence of NAFLD was differed  
9 between males and females, then we used gender-specific model in the further analysis.  
10  
11  
12  
13  
14  
15

16 In male, after adjusting for BMI, hypertension, diabetes, fasting blood glucose, and  
17 sedentary time in Multivariate logistic model 3, physical activity was associated with the risk of  
18 NAFLD in a dose-dependent manner. (>3180 MET-min/week vs. ≤1440 MET-min/week: OR=  
19 0.61, 95% CI=0.41-0.92, *P* for trend= 0.02). After further adjusting for energy intake, this  
20 association was maintained (>3180 MET-min/week vs. ≤1440 MET-min/week: OR= 0.60, 95%  
21 CI=0.40-0.91, *P* for trend= 0.01, Table 2).In female, there exist no relationship between physical  
22 activity and NAFLD (table s2).  
23  
24  
25  
26  
27  
28  
29  
30  
31  
32  
33  
34

35 We also calculated the distribution of the three energy nutrients (carbohydrate, fat and  
36 protein) in cases and controls stratified by gender (tableS3 and tableS4). After adjusting for the  
37 carbohydrate, total fat and protein, the association between physical activity and NAFLD was  
38 maintained in males(tableS5, tableS6). However daily diets contain a variety of foods, not  
39 individual nutrients or individual foods, and there are complex interactions between different  
40 nutrients or foods. Based on individual food or nutrient studies, the association between diet and  
41 NAFLD cannot be accurately assessed. Thus we finally analyzed only total energy intake in the  
42 finally multivariate logistic model.  
43  
44  
45  
46  
47  
48  
49  
50  
51  
52  
53  
54

55 Then we further analyzed the association between various intensities of physical activity  
56  
57  
58  
59  
60

and the risk of NAFLD. In males, the moderate- and vigorous-intensity levels were inversely associated with the risk of NAFLD, independent of the confounding variables: (Moderate-intensity physical activity: >684MET-min/week vs. none: OR=0.58, 95% CI=0.40-0.86,  $P$  for trend=0.01; Vigorous-intensity physical activity: >960 MET-min/week vs. none: OR=0.63, 95% CI= 0.41-0.95,  $P$  for trend=0.02, Table 2). In female, there is no association between various intensity of physical activity and NAFLD (table s3).

Table 2. Association between physical activity and NAFLD in male

| Variable (MET-minute/week) | Case number (%) | Control number(%) | Univariate model OR (95% CI) | Multivariate model 1 aOR (95% CI) | Multivariate model 2 aOR (95% CI) | Multivariate model 3 aOR (95% CI) |
|----------------------------|-----------------|-------------------|------------------------------|-----------------------------------|-----------------------------------|-----------------------------------|
| <b>Total amount of</b>     |                 |                   |                              |                                   |                                   |                                   |
| ≤1440                      | 153 (41.2)      | 124 (33.4)        | 1 (reference)                | 1 (reference)                     | 1 (reference)                     | 1 (reference)                     |
| 1440~3180                  | 104 (28.0)      | 124(33.4)         | 0.68(0.48-0.97)              | <b>0.62 (0.41-0.93)</b>           | <b>0.62 (0.41-0.93)</b>           | <b>0.62 (0.41-0.92)</b>           |
| >3180                      | 114(30.7)       | 123(33.2)         | 0.75 (0.53-1.06)             | <b>0.62 (0.41-0.92)</b>           | <b>0.61 (0.41-0.92)</b>           | <b>0.60(0.40-0.91)</b>            |
| $P$ value for trend        |                 |                   | 0.09                         | <b>0.02</b>                       | <b>0.02</b>                       | <b>0.01</b>                       |
| <b>Light intensity</b>     |                 |                   |                              |                                   |                                   |                                   |
| ≤525                       | 121 (32.6)      | 125 (33.7)        | 1 (reference)                | 1 (reference)                     | 1 (reference)                     | 1 (reference)                     |
| 525~1500                   | 127(34.2)       | 125(33.7)         | 1.05 (0.74-1.49)             | 1.00(0.67-1.49)                   | 1.00 (0.67-1.50)                  | 1.03(0.69-1.55)                   |
| >1500                      | 123 (33.2)      | 121 (32.6)        | 1.05 (0.74-1.50)             | 0.96(0.64-1.43)                   | 0.96(0.64-1.44)                   | 0.95(0.63-1.44)                   |
| $P$ value for trend        |                 |                   | 0.79                         | 0.83                              | 0.84                              | 0.82                              |
| <b>Moderate intensity</b>  |                 |                   |                              |                                   |                                   |                                   |
| None                       | 204 (55)        | 170 (45.8)        | 1 (reference)                | 1 (reference)                     | 1 (reference)                     | 1 (reference)                     |
| ≤684                       | 74 (19.9)       | 79 (21.3)         | 0.78 (0.54-1.14)             | 0.79 (0.52-1.21)                  | 0.79 (0.51-1.21)                  | 0.78(0.51-1.20)                   |
| >684                       | 93 (25.1)       | 122 (32.9)        | <b>0.64 (0.45-0.89)</b>      | <b>0.59 (0.40-0.86)</b>           | <b>0.58(0.39-0.86)</b>            | <b>0.58(0.40-0.86)</b>            |
| $P$ value for trend        |                 |                   | <b>0.01</b>                  | <b>0.01</b>                       | <b>0.01</b>                       | <b>0.01</b>                       |
| <b>Vigorous intensity</b>  |                 |                   |                              |                                   |                                   |                                   |
| none                       | 272 (73.3)      | 251 (67.7)        | 1 (reference)                | 1 (reference)                     | 1 (reference)                     | 1 (reference)                     |
| ≤960                       | 28 (7.5)        | 35(9.4)           | 0.74 (0.44-1.25)             | 0.77 (0.42-1.42)                  | 0.77(0.42-1.42)                   | 0.77(0.42-1.41)                   |
| >960                       | 71 (19.1)       | 85 (22.9)         | 0.77 (0.54-1.10)             | <b>0.65 (0.43-0.98)</b>           | <b>0.65 (0.43-0.98)</b>           | <b>0.63(0.41-0.95)</b>            |
| $P$ value for trend        |                 |                   | 0.12                         | <b>0.03</b>                       | <b>0.03</b>                       | <b>0.02</b>                       |

NAFLD: Non-alcoholic fatty liver disease

Multivariate model 1: adjusted for BMI, hypertension, diabetes, and fasting blood glucose

Multivariate model 2: adjusted for BMI, hypertension, diabetes, fasting blood glucose and sedentary time.

Multivariate model 3: adjusted for BMI, hypertension, diabetes, fasting blood glucose, sedentary time and energy intake.

ORs = odds ratios, aOR= adjusted odds ratios, CIs = confidence intervals

According to the Physical Activity Guidelines for Americans (PAGA) released by the

USDHHS<sup>[27]</sup>: more than 150 minutes of moderate-intensity physical activity per week or 75 minutes of vigorous-intensity physical activity per week is beneficial to health, we divided physical activity into different levels. The dose-response association was shown: males who underwent moderate- or vigorous-intensity physical activity had a significantly lower risk of NAFLD (Moderate-intensity physical activity  $\geq 2.5$  hours vs. none: OR=0.63, 95% CI=0.43-0.92;  $P$  for trend=0.01; Vigorous-intensity physical activity  $\geq 1.25$  hours vs. none: OR=0.66, 95% CI=0.45-0.96;  $P$  for trend=0.03, Table 3).

Table 3. Association between moderate- or vigorous-intensity physical activity and NAFLD in males

| Variable            | Case<br>number (%) | Control<br>number(%) | Univariate model<br>OR (95% CI) | Multivariate<br>aOR (95% CI) | Multivariate model 2<br>aOR (95% CI) | Multivariate model 3<br>aOR (95% CI) |
|---------------------|--------------------|----------------------|---------------------------------|------------------------------|--------------------------------------|--------------------------------------|
| (MET-minute/week    |                    |                      |                                 |                              |                                      |                                      |
| Moderate intensity  |                    |                      |                                 |                              |                                      |                                      |
| None                | 204(55.0)          | 170 (45.8)           | 1 (reference)                   | 1 (reference)                | 1 (reference)                        | 1 (reference)                        |
| ~2.5 hours          | 67 (18.1)          | 75(20.2)             | 0.74 (0.51-1.10)                | 0.73 (0.47-1.13)             | 0.72 (0.47-1.12)                     | 0.72 (0.46-1.12)                     |
| $\geq 2.5$ hours    | 100 (27.0)         | 126(34.0)            | <b>0.66 (0.47-0.92)</b>         | <b>0.63 (0.43-0.91)</b>      | <b>0.62(0.43-0.91)</b>               | <b>0.63(0.43-0.92)</b>               |
| $P$ value for trend |                    |                      | <b>0.01</b>                     | <b>0.01</b>                  | <b>0.01</b>                          | <b>0.01</b>                          |
| Vigorous intensity  |                    |                      |                                 |                              |                                      |                                      |
| None                | 272(73.3)          | 251(67.7)            | 1 (reference)                   | 1 (reference)                | 1 (reference)                        | 1 (reference)                        |
| ~1.25hours          | 9(2.4)             | 12 (3.2)             | 0.69 (0.29-1.67)                | 0.73 (0.26-2.07)             | 0.73 (0.26-2.07)                     | 0.74(0.26-2.08)                      |
| $\geq 1.25$ hours   | 90(24.3)           | 108 (29.1)           | 0.77 (0.55-1.07)                | <b>0.68 (0.47-0.98)</b>      | <b>0.68 (0.46-0.98)</b>              | <b>0.66(0.45-0.96)</b>               |
| $P$ value for trend |                    |                      | 0.10                            | <b>0.04</b>                  | <b>0.04</b>                          | <b>0.03</b>                          |

NAFLD: Non-alcoholic fatty liver disease

Multivariate model 1: adjusted for BMI, hypertension, diabetes, and fasting blood glucose

Multivariate model 2: adjusted for BMI, hypertension, diabetes, fasting blood glucose and sedentary time.

Multivariate model 3: adjusted for BMI, hypertension, diabetes, fasting blood glucose, sedentary time and energy intake.

ORs = odds ratios, aOR= adjusted odds ratios, CIs = confidence intervals

We explored the association between physical activity and biochemical indicators. In NAFLD patients, subjects who undergo a higher total amount of physical activity tend to have significantly lower levels of GGT ( $P=0.02$ ). In the control population, greater physical activity

was significantly associated with greater AST ( $P=0.001$ ) (Table 4).

Table 4. Association between total amount of physical activity and biochemical indicators in males

| Variable     | case                                   |             | control                                |              |
|--------------|----------------------------------------|-------------|----------------------------------------|--------------|
|              | Physical activity<br>(MET-minute/week) |             | Physical activity<br>(MET-minute/week) |              |
|              | Correlation                            | $p$         | Correlation coefficient                | $p$          |
| GGT (IU/L)   | <b>-0.13</b>                           | <b>0.02</b> | 0.05                                   | 0.33         |
| ALT (IU/L)   | -0.09                                  | 0.09        | 0.10                                   | 0.05         |
| AST (IU/L)   | 0.01                                   | 0.80        | <b>0.17</b>                            | <b>0.001</b> |
| TC (mmol/L)  | 0.01                                   | 0.87        | 0.01                                   | 0.80         |
| TG (mmol/L)  | -0.04                                  | 0.47        | -0.04                                  | 0.40         |
| HDL (mmol/L) | 0.05                                   | 0.35        | 0.03                                   | 0.53         |
| LDL (mmol/L) | -0.03                                  | 0.59        | 0.02                                   | 0.76         |

AST=serum aspartate aminotransferase, ALT=alanine aminotransferase, GGT= gamma-glutamyltranspeptidase, FBG=serum fasting glucose, TC=total cholesterol, TG=triglycerides, LDL=low-density lipoprotein, HDL=high-density lipoprotein, BMI=body mass index

## Discussion

Physical activity is a complex concept including type, intensity, frequency and duration. The parameters used to define the intensity of physical activity fall into two categories: absolute or relative. Absolute intensity refers to the rate of energy expenditure during physical activity and is usually presented as Metabolic Equivalent of Energy (MET). MET is a widely-used physiological concept defined as the ratio of work metabolic rate to a standard resting metabolic rate of 1Kcal/kg·h (1 MET=3.5ml O<sub>2</sub>/kg·min=1Kcal/kg·h).<sup>[28]</sup> Moderate-intensity physical activity corresponds to 40%~60% of VO<sub>2</sub> max or 4~6 METs. Vigorous-intensity physical activity corresponds to ≥60% of VO<sub>2</sub> max or > 6METs.<sup>[29]</sup> Since different methods are used to assess physical activity in the literature, the optimal intensity and dose of physical activity for the

1  
2  
3  
4 treatment of NAFLD have yet to be determined.  
5

6  
7 In the present study, the intensity of physical activity was measured in terms of MET; and  
8  
9 dose of physical activity was presented in the form of MET-min/week. We observed an inverse  
10  
11 dose-response association between physical activity and the risk of NAFLD, independent of  
12  
13 potential confounding variables. In males, patients with more than 3180 MET-min/week total  
14  
15 physical activity had a 40% lower risk of NAFLD compared to those with less than 1440  
16  
17 MET-min/week. In addition, we also found that moderate- and vigorous-intensity physical  
18  
19 activity were beneficial to NAFLD in males. When the dose of physical activity was divided  
20  
21 according to the Physical Activity Guidelines for Americans (PAGA) released by the USDHHS<sup>27</sup>  
22  
23 (more than 150 minutes of moderate-intensity physical activity per week or 75 minutes of  
24  
25 vigorous-intensity physical activity per week is beneficial to health), the dose-response  
26  
27 association was maintained. However, the relationship between physical activity and  
28  
29 nonalcoholic fatty liver disease has not been observed in females. The gender difference  
30  
31 observed in this study may be explained by sex hormones. Mechanism research have found that  
32  
33 sex hormones can up-regulate insulin receptor expression and increase receptor phosphorylation  
34  
35 protein kinase levels, thereby enhancing insulin signaling and preventing NAFLD.<sup>[30 31]</sup>  
36  
37 Furthermore, some sex hormones and their derivatives are strong endogenous antioxidants,  
38  
39 which can inhibit the production of lipid peroxides in the liver and reduce its concentration, and  
40  
41 play a protective role in the liver.<sup>[32]</sup> Several studies using maximal heart rate or percentage of  
42  
43 VO<sub>2</sub> max to define the intensity of physical activity indirectly supported our findings. One other  
44  
45 cross-sectional study has also found a dose-response association between physical activity and  
46  
47  
48  
49  
50  
51  
52  
53  
54  
55  
56  
57  
58  
59  
60

1  
2  
3  
4 NAFLD risk in terms of MET.<sup>[33]</sup> This study suggested that males with a dose of more than 5760  
5  
6 MET-min/week had a 31% lower risk of NAFLD compared to those with less than 498  
7  
8 MET-min/week. In females, the association was weaker. However, the study population was  
9  
10 heterogeneous, meaning that the results should be interpreted with caution and that optimal dose  
11  
12 of physical activity should be tailored to the patient's clinical characteristics, fitness status and  
13  
14 preferences.  
15  
16  
17  
18

19  
20 The mechanism by which physical activity improves NAFLD is unclear, although several  
21  
22 potential mechanisms have been suggested. First, insulin sensitivity is a plausible explanation,  
23  
24 <sup>[34]</sup>via increasing expression of glucose transport protein and synthase activity of muscle  
25  
26 glycogen, and decreasing the accumulation of serum triglyceride. Secondly, physical activity  
27  
28 decreases visceral adiposity, which in turn decreases free fatty acid influx to the liver. Thirdly,  
29  
30 physical activity is known to upregulate the intake of glucose and lipid oxidation in skeletal  
31  
32 muscle, which in turn depletes the accumulation of fatty acid in the liver.<sup>[35]</sup> In the present study,  
33  
34 we observed that increased physical activity was associated with decreased GGT levels in males  
35  
36 with NAFLD, and males with higher physical activity tend to have higher AST levels in controls.  
37  
38 Nevertheless, more studies are still needed to confirm the association between physical activity  
39  
40 and NAFLD and potential mechanisms should be explored.  
41  
42  
43  
44  
45  
46  
47

#### 48 *Strengths and limitations*

49

50  
51 There were several advantages to the current study. First, several potential confounding  
52  
53 variables, including energy intake and sedentary time, were taken into account. With the  
54  
55 development of technology and a better economy, people tend to spend more time in sedentary  
56  
57  
58  
59  
60

1  
2  
3  
4 activities: one study showed that sitting time was positively associated with risk of NAFLD,  
5  
6 even in subjects with a high level of physical activity.<sup>[36]</sup> Similarly, another study indicated that  
7  
8 regular participation in high levels of physical activity does not fully protect against the risks  
9  
10 associated with prolonged bouts of sedentary behaviors.<sup>[37]</sup> Other known risk factors of NAFLD  
11  
12 are energy intake and BMI. Several previous studies have found that NAFLD patients tend to  
13  
14 have higher energy intake, and a restricted-energy diet was found to have great benefits for  
15  
16 weight loss and improving BMI. <sup>[38-41]</sup> However, few studies have considered sedentary time and  
17  
18 energy intake at the same time when investigating the association between physical activity and  
19  
20 NAFLD. The potential confounding effect of these factors may reduce the power to detect  
21  
22 associations between physical activity and the risk of NAFLD.  
23  
24  
25  
26  
27  
28  
29

30 A second advantage to our study was that we used the well-known parameter MET to  
31  
32 quantify the intensity of physical activity; and also quantified dose of physical activity as  
33  
34 frequency and duration. We found a dose–response association between physical activity and  
35  
36 risk of NAFLD, which could provide evidence for a clinical treatment guideline for NAFLD.  
37  
38  
39

40 A third advantage was that this study had a considerable sample size and could thus provide  
41  
42 substantial statistical power to assess the effect of physical activity on NAFLD.  
43  
44

45 However, several limitations should be considered. First, this study was a case-control  
46  
47 design, thus the causal association between physical activity and NAFLD could not be precisely  
48  
49 identified. Second, the level of physical activity was self-reported: subjects often have difficulty  
50  
51 in recalling physical activity undertaken in the past seven days and tend to underestimate the  
52  
53 time spent in specific activities. Therefore, misclassification bias was inevitable and could have  
54  
55  
56  
57  
58  
59

1  
2  
3  
4 affected the calculated association between physical activity and NAFLD. Randomized  
5  
6 controlled trial studies are therefore required for more accurate results. Third, Liver biopsy is the  
7  
8 gold standard for quantitative diagnosis of NAFLD. However it is an invasive examination, there  
9  
10 exist the possibility of postoperative blood and bile leakage, and there are sampling errors,  
11  
12 therefore does not apply to routine screening. In current study, NAFLD was diagnosed by  
13  
14 abdominal ultrasonography. Ultrasound examination currently is the preferred method for the  
15  
16 initial screening of NAFLD with its advantages of no scratching, no radiation damage,  
17  
18 reproducibility and low price. It is based on the enhancement or attenuation of intrahepatic echo  
19  
20 and the progression of intravascular blood vessels. In moderate to severe steatosis, the sensitivity  
21  
22 and specificity of ultrasound diagnosis are high (78.4%~90.8% and 76.9%~90.9%, respectively).  
23  
24 [42]However, ultrasound diagnosis is susceptible to individual differences, checking instrument  
25  
26 performance and parameter selection, operating experience and many other factors, so ultrasound  
27  
28 quantitative diagnosis of fatty liver still has limitations. This diagnosis mainly depends on the  
29  
30 subjective judgment of the operator, and there is no objective and unified quantitative index. And  
31  
32 it is difficult to identify liver fibrosis and liver fat. Each method has its own advantages and  
33  
34 disadvantages. It is hoped that with the advancement of science and technology, better  
35  
36 non-invasive diagnostic methods will emerge.  
37  
38  
39  
40  
41  
42  
43  
44  
45  
46  
47

## 48 **Conclusions**

49  
50 The present study found that high physical activity was inversely associated with the risk of  
51  
52 NAFLD in a dose-dependent manner in males, with moderate- and vigorous-intensity physical  
53  
54 activity having the greatest effect on reducing risk.  
55  
56  
57  
58  
59  
60



---

## Acknowledgement

We thank all study participants for their cooperation. We also thank our staff for recruiting subjects and their technical assistance.

## Conflict of interests

all authors have declare: no support from any organization for the submitted work; no financial relationships with any organization that might have an interest in the submitted work in the previous three years, no other relationships or activities that could appear to have influenced the submitted work.

## Contributors

YFL and FH are joint first authors. XEP obtained funding. XEP, ZJH , XL and SHX designed the study. XTP and YFL collected the data. YLW and YH were involved in data cleaning and verification. YFL and XTP analyzed the data. YFL and FH drafted the manuscript. XEP and ZJH contributed to the interpretation of the results and critical revision of the manuscript for important intellectual content and approved the final version of the manuscript. All authors have read and approved the final manuscript.

## Data sharing

Data is stored in Department of Epidemiology and Health Statistics, Fujian Provincial Key Laboratory of Environment Factors and Cancer, School of Public Health, Fujian Medical University, Fujian, China. Data are available upon request from XianE Peng; email address: Peng;fmuxe@163.com (X.E.P.)

## Source of funding

This work was supported by the National Natural Science Foundation of China [grant number 81473047 and 81401657], the Training Program Foundation for Middle-aged and Young Talents from Sanitation System of Fujian Province [grant number 2014-ZQN-ZD-23], and the Joint Innovation Project of Science and Technology of Fujian Province [grant number 2017Y9104].

## References

1. CD W, SA H. Features, diagnosis, and treatment of nonalcoholic fatty liver disease.%A Torres DM. *Clinical gastroenterology and hepatology : the official clinical practice journal of the American Gastroenterological Association* 2012;10(8):837-58.
2. Rinella ME. Nonalcoholic fatty liver disease: a systematic review. *JAMA* 2015;313(22):2263-73. doi: 10.1001/jama.2015.5370
3. AB K, D A, Y F, et al. Global epidemiology of nonalcoholic fatty liver disease-Meta-analytic assessment of prevalence, incidence, and outcomes.%A Younossi ZM. *Hepatology (Baltimore, Md)* 2016;64(1):73-84.
4. J X, P C, L C, et al. Prevalence of nonalcoholic fatty liver disease in mainland of China: a meta-analysis of published studies.%A Li Z. *Journal of gastroenterology and hepatology* 2014;29(1):42-51.
5. B R, H P, B D, et al. Non-alcoholic fatty liver disease (NAFLD) and 10-year risk of cardiovascular diseases.%A Motamed N. *Clinics and research in hepatology and gastroenterology* 2017;41(1):31-38.

- 1  
2  
3  
4 6. M M, E B, RA D, et al. Non-alcoholic fatty liver disease (NAFLD) and its connection with  
5  
6 insulin resistance, dyslipidemia, atherosclerosis and coronary heart disease.%A Gaggini  
7  
8 M. *Nutrients* 2013;5(5):1544-60.  
9  
10
- 11 7. R L, B O, J F, et al. Prevalence of prediabetes and diabetes and metabolic profile of patients  
12  
13 with nonalcoholic fatty liver disease (NAFLD).%A Ortiz-Lopez C. *Diabetes care*  
14  
15 2012;35(4):873-8.  
16  
17
- 18 8. V Da, C C, B N, et al. A case-control study on the effect of metabolic gene polymorphisms,  
19  
20 nutrition, and their interaction on the risk of non-alcoholic fatty liver disease.%A Miele L.  
21  
22 *Genes & nutrition* 2014;9(2):383.  
23  
24
- 25 9. M G, GV P, E F, et al. Associations Between Lifestyle Characteristics and the Presence of  
26  
27 Nonalcoholic Fatty Liver Disease: A Case-Control Study.%A Katsagoni CN. *Metabolic*  
28  
29 *syndrome and related disorders* 2017;15(2):72-79.  
30  
31  
32
- 33 10. C T, K H, S C, et al. Exercise Reduces Liver Lipids and Visceral Adiposity in  
34  
35 Patients With Nonalcoholic Steatohepatitis in a Randomized Controlled Trial.%A  
36  
37 Houghton D. *Clinical gastroenterology and hepatology : the official clinical practice*  
38  
39 *journal of the American Gastroenterological Association* 2017;15(1):96-102.e3.  
40  
41  
42
- 43 11. LL P, ZM M, Z C, et al. Long-term effect of exercise on improving fatty liver and  
44  
45 cardiovascular risk factors in obese adults: A 1-year follow-up study.%A Zhang HJ.  
46  
47 *Diabetes, obesity & metabolism* 2017;19(2):284-89.  
48  
49  
50
- 51 12. EP K, B M, BW P, et al. Randomized trial of exercise effect on intrahepatic triglyceride  
52  
53 content and lipid kinetics in nonalcoholic fatty liver disease.%A Sullivan S. *Hepatology*  
54  
55  
56  
57  
58  
59  
60

- (*Baltimore, Md*) 2012;55(6):1738-45.
13. C T, KG H, S C, et al. Modified high-intensity interval training reduces liver fat and improves cardiac function in non-alcoholic fatty liver disease: a randomized controlled trial.%A Hallsworth K. *Clinical science (London, England : 1979)* 2015;129(12):1097-105.
14. Katsagoni CN, Georgoulis M, Papatheodoridis GV, et al. Effects of lifestyle interventions on clinical characteristics of patients with non-alcoholic fatty liver disease: A meta-analysis. *Metabolism* 2017;68:119-32. doi: 10.1016/j.metabol.2016.12.006
15. Korean Association for the Study of the L. KASL clinical practice guidelines: management of nonalcoholic fatty liver disease. *Clin Mol Hepatol* 2013;19(4):325-48. doi: 10.3350/cmh.2013.19.4.325
16. Chalasani N, Younossi Z, Lavine JE, et al. The diagnosis and management of non-alcoholic fatty liver disease: practice guideline by the American Gastroenterological Association, American Association for the Study of Liver Diseases, and American College of Gastroenterology. *Gastroenterology* 2012;142(7):1592-609. doi: 10.1053/j.gastro.2012.04.001
17. X C, Z S, L L, et al. Association between physical activity and risk of nonalcoholic fatty liver disease: a meta-analysis.%A Qiu S. *Therapeutic advances in gastroenterology* 2017;10(9):701-13.
18. Farrell GC, Chitturi S, Lau GKK, et al. Guidelines for the assessment and management of non-alcoholic fatty liver disease in the Asia-Pacific region: Executive summary. *Journal*

- 
- of *Gastroenterology and Hepatology* 2007;22(6):775-77. doi:  
10.1111/j.1440-1746.2007.05002.x
19. N C. Drug-induced hepatic steatosis.%A Amacher DE. *Seminars in liver disease* 2014;34(2):205-14.
20. Bassett DR, Jr. International physical activity questionnaire: 12-country reliability and validity. *Med Sci Sports Exerc* 2003;35(8):1396. doi:  
10.1249/01.MSS.0000078923.96621.1D
21. WL H, SD H, N M, et al. 2011 Compendium of Physical Activities: a second update of codes and MET values.%A Ainsworth BE. *Medicine and science in sports and exercise* 2011;43(8):1575-81.
22. I S, H V, A B-A, et al. Development of a semi-quantitative Food Frequency Questionnaire (FFQ) to assess dietary intake of multiethnic populations.%A Shahar D. *European journal of epidemiology* 2003;18(9):855-61.
23. <Relative Validity of a Semi-quantitative Food Frequency Questionnaire Versus 3 day Weighed Diet Records in Middleaged Inhabitants in Chaoshan Area, China.pdf>.
24. Yuexin Y, Guang W, Xingchang P. China food composition. Peking University Medical Press 2009:1-360
25. Y H, B J, J W, et al. BMI versus the metabolic syndrome in relation to cardiovascular risk in elderly Chinese individuals. *Diabetes care* 2007;30(8):2128-34.
26. S M, G M, J W, et al. 1999 World Health Organization-International Society of Hypertension Guidelines for the management of hypertension. Guidelines sub-committee of the World

- 
- Health Organization.%A Chalmers J. *Clinical and experimental hypertension (New York, NY : 1993)* 1999;21(null):1009-60.
27. GJ W, NK B. Physical activity in U.S.: adults compliance with the Physical Activity Guidelines for Americans.%A Tucker JM. *American journal of preventive medicine* 2011;40(4):454-61.
28. E P, A Y, A H-W, et al. Heart rate as an indicator of the intensity of physical activity in human adolescents.%A Ekelund U. *European journal of applied physiology* 2001;85(null):244-9.
29. Fletcher GF, Ades PA, Kligfield P, et al. Exercise standards for testing and training: a scientific statement from the American Heart Association. *Circulation* 2013;128(8):873-934. doi: 10.1161/CIR.0b013e31829b5b44
30. S P, SM H, IL A, et al. Estrogen replacement reverses olanzapine-induced weight gain and hepatic insulin resistance in ovariectomized diabetic rats. *Neuropsychobiology* 2010;61(3):148-61.
31. P B, R M, MM A, et al. Effects of ovariectomy and estrogen replacement therapy on visceral adipose tissue and serum adiponectin levels in rats. *Menopause international* 2010;16(3):100-4.
32. A Tu, H U, H B, et al. Effects of estrogens on oxidative protein damage in plasma and tissues in ovariectomised rats. *Clinical and investigative medicine Medecine clinique et experimentale* 2009;32(2):E133-43.
33. D K, GE C, W K, et al. Role of physical activity in nonalcoholic fatty liver disease in terms

- of visceral obesity and insulin resistance.%A Kwak MS. *Liver international : official journal of the International Association for the Study of the Liver* 2015;35(3):944-52.
34. Y L, RS R, EJ P, et al. Energy-matched moderate and high intensity exercise training improves nonalcoholic fatty liver disease risk independent of changes in body mass or abdominal adiposity - A randomized trial.%A Winn NC. *Metabolism: clinical and experimental* 2018;78(undefiend):128-40.
35. J H, LL P, ZM M, et al. Effects of Moderate and Vigorous Exercise on Nonalcoholic Fatty Liver Disease: A Randomized Clinical Trial.%A Zhang HJ. *JAMA internal medicine* 2016;176(8):1074-82.
36. Y C, HS J, KE Y, et al. Relationship of sitting time and physical activity with non-alcoholic fatty liver disease.%A Ryu S. *Journal of hepatology* 2015;63(5):1229-37.
37. SM G, SC M, HR B, et al. Amount of time spent in sedentary behaviors and cause-specific mortality in US adults.%A Matthews CE. *The American journal of clinical nutrition* 2012;95(2):437-45.
38. V dL, J V, J F, et al. Hepatic Steatosis, Carbohydrate Intake, and Food Quotient in Patients with NAFLD.%A Gonzalez C. *International journal of endocrinology* 2013;2013(undefiend):428542.
39. A D, B K, H L, et al. Health Benefits of Fasting and Caloric Restriction.%A Golbidi S. *Current diabetes reports* 2017;17(12):123.
40. SM A, A E, P A, et al. Dietary Quality Indices and Biochemical Parameters Among Patients With Non Alcoholic Fatty Liver Disease (NAFLD).%A Hashemi Kani A. *Hepatitis*

1  
2  
3  
4 *monthly* 2013;13(7):e10943.  
5

6  
7 41. K Z, Y C, Y L, et al. Associations between Dietary Nutrient Intakes and Hepatic Lipid  
8  
9 Contents in NAFLD Patients Quantified by  $\hat{A}^1$ H-MRS and Dual-Echo MRI.%A Cheng Y.  
10  
11 *Nutrients* 2016;8(9):undefined.  
12  
13

14 42. JR vW, S B, J S. The diagnostic accuracy of US, CT, MRI and 1H-MRS for the evaluation of  
15  
16 hepatic steatosis compared with liver biopsy: a meta-analysis.%A Bohte AE. *European*  
17  
18 *radiology* 2011;21(1):87-97.  
19  
20  
21  
22  
23  
24  
25  
26  
27  
28  
29  
30  
31  
32  
33  
34  
35  
36  
37  
38  
39  
40  
41  
42  
43  
44  
45  
46  
47  
48  
49  
50  
51  
52  
53  
54  
55  
56  
57  
58  
59  
60



Table S1. Association between physical activity and NAFLD

| Variable                 | Case       | Control    | Univariate model        | Multivariate model 1    | Multivariate model 2    | Multivariate model 3   |
|--------------------------|------------|------------|-------------------------|-------------------------|-------------------------|------------------------|
| (MET-minute/week)        | number     | number(%)  | OR (95% CI)             | aOR (95% CI)            | aOR (95% CI)            | aOR (95% CI)           |
| Total amount of          |            |            |                         |                         |                         |                        |
| ≤1620                    | 182 (33.5) | 152 (28)   | 1 (reference)           | 1 (reference)           | 1 (reference)           | 1 (reference)          |
| 1620~3943.8              | 180 (33.1) | 200(36.8)  | 0.75(0.56-1.01)         | 0.72 (0.52-1.00)        | 0.72(0.52-1.01)         | 0.74(0.53-1.03)        |
| >3943.8                  | 181(33.3)  | 191(35.2)  | 0.79 (0.59-1.06)        | 0.75 (0.54-1.05)        | 0.76(0.54-1.07)         | 0.79(0.56-1.11)        |
| <i>P</i> value for trend |            |            | 0.13                    | 0.11                    | 0.13                    | 0.19                   |
| Light intensity          |            |            |                         |                         |                         |                        |
| ≤840                     | 183 (33.7) | 193 (35.5) | 1 (reference)           | 1 (reference)           | 1 (reference)           | 1 (reference)          |
| 840~2100                 | 185 (34.1) | 196(36.1)  | 1.00 (0.75-1.32)        | 0.97(0.70-1.34)         | 0.98 (0.71-1.35)        | 1.00(0.73-1.39)        |
| >2100                    | 175 (32.2) | 154 (28.4) | 1.20 (0.89-1.61)        | 1.22(0.88-1.71)         | 1.26(0.90-1.77)         | 1.32(0.94-1.86)        |
| <i>P</i> value for trend |            |            | 0.24                    | 0.24                    | 0.19                    | 0.12                   |
| Moderate intensity       |            |            |                         |                         |                         |                        |
| None                     | 223 (41.1) | 193 (35.5) | 1 (reference)           | 1 (reference)           | 1 (reference)           | 1 (reference)          |
| ≤840                     | 163 (30.0) | 163 (30.0) | 0.87(0.65-1.16)         | 0.89 (0.64-1.23)        | 0.89 (0.64-1.24)        | 0.91(0.65-1.26)        |
| >840                     | 157 (28.9) | 187 (34.4) | <b>0.73 (0.55-0.97)</b> | 0.80 (0.58-1.10)        | 0.81(0.59-1.12)         | 0.85(0.61-1.19)        |
| <i>P</i> value for trend |            |            | <b>0.03</b>             | 0.17                    | 0.21                    | 0.34                   |
| Vigorous intensity       |            |            |                         |                         |                         |                        |
| none                     | 432 (79.6) | 400 (73.7) | 1 (reference)           | 1 (reference)           | 1 (reference)           | 1 (reference)          |
| ≤960                     | 32 (5.9)   | 46(8.5)    | 0.64 (0.40-1.03)        | 0.70 (0.41-1.20)        | 0.70(0.41-1.20)         | 0.69(0.40-1.18)        |
| >960                     | 79 (14.5)  | 97 (17.9)  | 0.75 (0.54-1.05)        | <b>0.67 (0.47-0.97)</b> | <b>0.68 (0.47-0.98)</b> | <b>0.64(0.44-0.93)</b> |
| <i>P</i> value for trend |            |            | 0.04                    | <b>0.02</b>             | <b>0.02</b>             | <b>0.06</b>            |

NAFLD: Non-alcoholic fatty liver disease

Multivariate model 1: adjusted for BMI, hypertension, diabetes, and fasting blood glucose

Multivariate model 2: adjusted for BMI, hypertension, diabetes, fasting blood glucose and sedentary time.

Multivariate model 3: adjusted for BMI, hypertension, diabetes, fasting blood glucose, sedentary time and energy intake.

ORs = odds ratios, aOR= adjusted odds ratios, CIs = confidence intervals

Table S2. Association between physical activity and NAFLD in female

| Variable<br>(MET-minute/week) | Case<br>number | Control<br>number(%) | Univariate model<br>OR (95% CI) | Multivariate model 1<br>aOR (95% CI) | Multivariate model 2<br>aOR (95% CI) | Multivariate model 3<br>aOR (95% CI) |
|-------------------------------|----------------|----------------------|---------------------------------|--------------------------------------|--------------------------------------|--------------------------------------|
| Total amount of               |                |                      |                                 |                                      |                                      |                                      |
| ≤3010.2                       | 58 (33.7)      | 57 (33.1)            | 1 (reference)                   | 1 (reference)                        | 1 (reference)                        | 1 (reference)                        |
| 3010.2~5833.8                 | 65 (37.8)      | 58(33.7)             | 1.10(0.66-1.83)                 | 0.72 (0.40-1.30)                     | 0.73 (0.40-1.32)                     | 0.73(0.40-1.31)                      |
| >5833.8                       | 49(28.5)       | 57(33.1)             | 0.85 (0.50-1.43)                | 0.71 (0.39-1.30)                     | 0.73 (0.40-1.36)                     | 0.72(0.39-1.33)                      |
| <i>P</i> value for trend      |                |                      | 0.55                            | 0.27                                 | 0.32                                 | 0.29                                 |
| Light intensity               |                |                      |                                 |                                      |                                      |                                      |
| ≤1575                         | 57 (33.1)      | 60 (34.9)            | 1 (reference)                   | 1 (reference)                        | 1 (reference)                        | 1 (reference)                        |
| 1575~3150                     | 66(38.4)       | 66(38.4)             | 1.05 (0.64-1.73)                | 0.85(0.48-1.50)                      | 0.87 (0.49-1.55)                     | 0.88(0.50-1.57)                      |
| >3150                         | 49 (28.5)      | 46 (26.7)            | 1.12 (0.65-1.93)                | 0.75(0.40-1.41)                      | 0.77(0.41-1.48)                      | 0.76(0.40-1.46)                      |
| <i>P</i> value for trend      |                |                      | 0.68                            | 0.36                                 | 0.44                                 | 0.41                                 |
| Moderate intensity            |                |                      |                                 |                                      |                                      |                                      |
| ≤840                          | 72 (41.9)      | 67 (39)              | 1 (reference)                   | 1 (reference)                        | 1 (reference)                        | 1 (reference)                        |
| 840~1984.8                    | 50 (29.1)      | 48 (27.9)            | 0.97 (0.58-1.63)                | 0.81 (0.44-1.47)                     | 0.82 (0.45-1.51)                     | 0.82(0.45-1.50)                      |
| >1984.8                       | 50 (29.1)      | 57 (33.1)            | 0.82 (0.49-1.35)                | 0.78 (0.44-1.38)                     | 0.80 (0.45-1.42)                     | 0.80(0.45-1.43)                      |
| <i>P</i> value for trend      |                |                      | 0.44                            | 0.38                                 | 0.43                                 | 0.44                                 |
| Vigorous intensity            |                |                      |                                 |                                      |                                      |                                      |
| none                          | 160 (93)       | 149 (86.6)           | 1 (reference)                   | 1 (reference)                        | 1 (reference)                        | 1 (reference)                        |
| yes                           | 12 (7)         | 23 (13.4)            | 0.49 (0.23-1.01)                | 0.77 (0.34-1.76)                     | 0.77 (0.34-1.76)                     | 0.77(0.34-1.74)                      |

NAFLD: Non-alcoholic fatty liver disease

Multivariate model 1: adjusted for BMI, hypertension, diabetes, and fasting blood glucose

Multivariate model 2: adjusted for BMI, hypertension, diabetes, fasting blood glucose and sedentary time.

Multivariate model 3: adjusted for BMI, hypertension, diabetes, fasting blood glucose, sedentary time and energy intake.

ORs = odds ratios, aOR= adjusted odds ratios, CIs = confidence intervals

TableS3. the distribution of the three energy nutrients in the case and the control in males

| Variable                    | case                      | control                  | <i>z</i>     | <i>p</i>         |
|-----------------------------|---------------------------|--------------------------|--------------|------------------|
| Energy intake ( Kilojoule ) | 2456.70 (2074.46-2856.50) | 2364.34 (1933.76-2789.0) | <b>-2.42</b> | <b>0.02</b>      |
| Carbohydrate(g)             | 349.64 (276.77-429.11)    | 349.45 (261.89-427.34)   | -0.90        | 0.37             |
| Fat(g)                      | 79.37 (66.86-93.67)       | 71.97 (61.19-84.63)      | <b>-4.87</b> | <b>&lt;0.001</b> |
| Protein(g)                  | 77.96 (65.05-93.07)       | 75.00 (62.38-91.73)      | -2.00        | 0.05             |

TableS4. the distribution of the three energy nutrients in the case and the control in females

| Variable                    | case                     | control                  | <i>z</i>     | <i>p</i>         |
|-----------------------------|--------------------------|--------------------------|--------------|------------------|
| Energy intake ( Kilojoule ) | 1755.38(1540.99-2065.81) | 1669.87(1468.99-2014.09) | -1.71        | 0.09             |
| Carbohydrate(g)             | 228.70(183.64-270.82)    | 233.72(194.89-278.61)    | -1.19        | 0.23             |
| Fat(g)                      | 67.29(58.74-80.90)       | 57.90(49.91-67.89)       | <b>-5.45</b> | <b>&lt;0.001</b> |
| Protein(g)                  | 57.44(49.57-68.92)       | 57.07(47.44-68.26)       | -0.40        | 0.69             |

Table S5. Association between physical activity and NAFLD in male

| Variable                 | Case       | Control    | Multivariate model 1    | Multivariate model 2    | Multivariate model3     | Multivariate model 4   |
|--------------------------|------------|------------|-------------------------|-------------------------|-------------------------|------------------------|
| (MET-minute/week)        | number (%) | number(%)  | aOR (95% CI)            | aOR (95% CI)            | aOR (95% CI)            | aOR (95% CI)           |
| Total amount of          |            |            |                         |                         |                         |                        |
| ≤1440                    | 153 (41.2) | 124 (33.4) | 1 (reference)           | 1 (reference)           | 1 (reference)           | 1 (reference)          |
| 1440~3180                | 104 (28.0) | 124(33.4)  | <b>0.62 (0.41-0.91)</b> | <b>0.62 (0.41-0.93)</b> | <b>0.60 (0.40-0.91)</b> | <b>0.61(0.41-0.91)</b> |
| >3180                    | 114(30.7)  | 123(33.2)  | <b>0.60(0.40-0.91)</b>  | <b>0.61 (0.41-0.92)</b> | <b>0.58 (0.39-0.88)</b> | <b>0.60(0.40-0.89)</b> |
| <i>P</i> value for trend |            |            | <b>0.01</b>             | <b>0.02</b>             | <b>0.01</b>             | <b>0.01</b>            |
| Light intensity          |            |            |                         |                         |                         |                        |
| ≤525                     | 121 (32.6) | 125 (33.7) | 1 (reference)           | 1 (reference)           | 1 (reference)           | 1 (reference)          |
| 525~1500                 | 127(34.2)  | 125(33.7)  | 1.03(0.69-1.55)         | 1.01(0.68-1.52)         | 1.05 (0.70-1.57)        | 1.02(0.68-1.52)        |
| >1500                    | 123 (33.2) | 121 (32.6) | 0.95(0.63-1.44)         | 0.96(0.64-1.45)         | 0.94(0.62-1.41)         | 0.94(0.63-1.42)        |
| <i>P</i> value for trend |            |            | 0.82                    | 0.85                    | 0.75                    | 0.79                   |
| Moderate intensity       |            |            |                         |                         |                         |                        |
| None                     | 204 (55)   | 170 (45.8) | 1 (reference)           | 1 (reference)           | 1 (reference)           | 1 (reference)          |
| ≤684                     | 74 (19.9)  | 79 (21.3)  | 0.78(0.51-1.20)         | 0.79 (0.51-1.20)        | 0.79 (0.51-1.22)        | 0.78(0.51-1.20)        |
| >684                     | 93 (25.1)  | 122 (32.9) | <b>0.58(0.40-0.86)</b>  | <b>0.58 (0.39-0.86)</b> | <b>0.60(0.40-0.88)</b>  | <b>0.58(0.40-0.86)</b> |
| <i>P</i> value for trend |            |            | <b>0.01</b>             | <b>0.01</b>             | <b>0.01</b>             | <b>0.01</b>            |
| Vigorous intensity       |            |            |                         |                         |                         |                        |
| none                     | 272 (73.3) | 251 (67.7) | 1 (reference)           | 1 (reference)           | 1 (reference)           | 1 (reference)          |
| ≤960                     | 28 (7.5)   | 35(9.4)    | 0.77(0.42-1.41)         | 0.78(0.42-1.43)         | 0.77(0.39-1.30)         | 0.76(0.41-1.39)        |
| >960                     | 71 (19.1)  | 85 (22.9)  | <b>0.63(0.41-0.95)</b>  | <b>0.64 (0.43-0.97)</b> | <b>0.61(0.40-0.92)</b>  | <b>0.62(0.41-0.93)</b> |
| <i>P</i> value for trend |            |            | <b>0.02</b>             | <b>0.03</b>             | <b>0.02</b>             | <b>0.02</b>            |

NAFLD: Non-alcoholic fatty liver disease

Multivariate model 1: adjusted for BMI, hypertension, diabetes, fasting blood glucose, sedentary time and total energy intake

Multivariate model 2: adjusted for BMI, hypertension, diabetes, fasting blood glucose, sedentary time and carbohydrate

Multivariate model 3: adjusted for BMI, hypertension, diabetes, fasting blood glucose, sedentary time and fat

Multivariate model 4: adjusted for BMI, hypertension, diabetes, fasting blood glucose, sedentary time and protein

ORs = odds ratios, aOR= adjusted odds ratios, CIs = confidence intervals

Table S6. Association between physical activity and NAFLD in female

| Variable                 | Case      | Control    | Multivariate model 1 | Multivariate model 2 | Multivariate model3 | Multivariate model 4 |
|--------------------------|-----------|------------|----------------------|----------------------|---------------------|----------------------|
| (MET-minute/week)        | number    | number(%)  | aOR (95% CI)         | aOR (95% CI)         | aOR (95% CI)        | aOR (95% CI)         |
| Total amount of          |           |            |                      |                      |                     |                      |
| ≤3010.2                  | 58 (33.7) | 57 (33.1)  | 1 (reference)        | 1 (reference)        | 1 (reference)       | 1 (reference)        |
| 3010.2~5833.8            | 65 (37.8) | 58(33.7)   | 0.73(0.40-1.31)      | 0.74 (0.41-1.35)     | 0.80 (0.44-1.48)    | 0.73(0.40-1.32)      |
| >5833.8                  | 49(28.5)  | 57(33.1)   | 0.72(0.39-1.33)      | 0.75 (0.41-1.40)     | 0.75 (0.40-1.40)    | 0.74(0.40-1.36)      |
| <i>P</i> value for trend |           |            | 0.29                 | 0.38                 | 0.37                | 0.32                 |
| Light intensity          |           |            |                      |                      |                     |                      |
| ≤1575                    | 57 (33.1) | 60 (34.9)  | 1 (reference)        | 1 (reference)        | 1 (reference)       | 1 (reference)        |
| 1575~3150                | 66(38.4)  | 66(38.4)   | 0.88(0.50-1.57)      | 0.87(0.49-1.56)      | 1.02 (0.56-1.84)    | 0.86(0.48-1.54)      |
| >3150                    | 49 (28.5) | 46 (26.7)  | 0.76(0.40-1.46)      | 0.80(0.42-1.52)      | 0.80(0.41-1.55)     | 0.77(0.41-1.48)      |
| <i>P</i> value for trend |           |            | 0.41                 | 0.36                 | 0.53                | 0.43                 |
| Moderate intensity       |           |            |                      |                      |                     |                      |
| ≤840                     | 72 (41.9) | 67 (39)    | 1 (reference)        | 1 (reference)        | 1 (reference)       | 1 (reference)        |
| 840~1984.8               | 50 (29.1) | 48 (27.9)  | 0.82(0.45-1.50)      | 0.84 (0.46-1.53)     | 0.87(0.47-1.61)     | 0.79(0.44-1.41)      |
| >1984.8                  | 50 (29.1) | 57 (33.1)  | 0.80(0.45-1.43)      | 0.80 (0.45-1.43)     | 0.87 (0.48-1.56)    | 1.00(0.99-1.01)      |
| <i>P</i> value for trend |           |            | 0.44                 | 0.45                 | 0.63                | 0.42                 |
| Vigorous intensity       |           |            |                      |                      |                     |                      |
| none                     | 160 (93)  | 149 (86.6) | 1 (reference)        | 1 (reference)        | 1 (reference)       | 1 (reference)        |
| yes                      | 12 (7)    | 23 (13.4)  | 0.77(0.34-1.74)      | 0.77 (0.34-1.75)     | 0.72 (0.31-1.66)    | 0.78(0.34-1.79)      |

NAFLD: Non-alcoholic fatty liver disease

Multivariate model 1: adjusted for BMI, hypertension, diabetes, fasting blood glucose, sedentary time and total energy intake

Multivariate model 2: adjusted for BMI, hypertension, diabetes, fasting blood glucose, sedentary time and carbohydrate

Multivariate model 3: adjusted for BMI, hypertension, diabetes, fasting blood glucose, sedentary time and fat

Multivariate model 4: adjusted for BMI, hypertension, diabetes, fasting blood glucose, sedentary time and protein

ORs = odds ratios, aOR= adjusted odds ratios, CIs = confidence intervals

STROBE Statement—Checklist of items that should be included in reports of *case-control studies*

|                              | Item No | Recommendation                                                                                                                                                                                    | Page No |
|------------------------------|---------|---------------------------------------------------------------------------------------------------------------------------------------------------------------------------------------------------|---------|
| <b>Title and abstract</b>    | 1       | (a) Indicate the study's design with a commonly used term in the title or the abstract                                                                                                            | 2       |
|                              |         | (b) Provide in the abstract an informative and balanced summary of what was done and what was found                                                                                               | 2       |
| <b>Introduction</b>          |         |                                                                                                                                                                                                   |         |
| Background/rationale         | 2       | Explain the scientific background and rationale for the investigation being reported                                                                                                              | 3-4     |
| Objectives                   | 3       | State specific objectives, including any prespecified hypotheses                                                                                                                                  | 4       |
| <b>Methods</b>               |         |                                                                                                                                                                                                   |         |
| Study design                 | 4       | Present key elements of study design early in the paper                                                                                                                                           | 5       |
| Setting                      | 5       | Describe the setting, locations, and relevant dates, including periods of recruitment, exposure, follow-up, and data collection                                                                   | 5       |
| Participants                 | 6       | (a) Give the eligibility criteria, and the sources and methods of case ascertainment and control selection. Give the rationale for the choice of cases and controls                               | 5-6     |
|                              |         | (b) For matched studies, give matching criteria and the number of controls per case                                                                                                               | 5       |
| Variables                    | 7       | Clearly define all outcomes, exposures, predictors, potential confounders, and effect modifiers. Give diagnostic criteria, if applicable                                                          | 6-8     |
| Data sources/<br>measurement | 8*      | For each variable of interest, give sources of data and details of methods of assessment (measurement). Describe comparability of assessment methods if there is more than one group              | 6-8     |
| Bias                         | 9       | Describe any efforts to address potential sources of bias                                                                                                                                         | 17      |
| Study size                   | 10      | Explain how the study size was arrived at                                                                                                                                                         | 5       |
| Quantitative variables       | 11      | Explain how quantitative variables were handled in the analyses. If applicable, describe which groupings were chosen and why                                                                      | 6-8     |
| Statistical methods          | 12      | (a) Describe all statistical methods, including those used to control for confounding                                                                                                             | 9       |
|                              |         | (b) Describe any methods used to examine subgroups and interactions                                                                                                                               |         |
|                              |         | (c) Explain how missing data were addressed                                                                                                                                                       |         |
|                              |         | (d) If applicable, explain how matching of cases and controls was addressed                                                                                                                       | 5       |
|                              |         | (e) Describe any sensitivity analyses                                                                                                                                                             |         |
| <b>Results</b>               |         |                                                                                                                                                                                                   |         |
| Participants                 | 13*     | (a) Report numbers of individuals at each stage of study—eg numbers potentially eligible, examined for eligibility, confirmed eligible, included in the study, completing follow-up, and analysed | 9       |
|                              |         | (b) Give reasons for non-participation at each stage                                                                                                                                              | 6       |
|                              |         | (c) Consider use of a flow diagram                                                                                                                                                                |         |
| Descriptive data             | 14*     | (a) Give characteristics of study participants (eg demographic, clinical, social) and information on exposures and potential confounders                                                          | 10      |
|                              |         | (b) Indicate number of participants with missing data for each variable of interest                                                                                                               | 10      |
| Outcome data                 | 15*     | Report numbers in each exposure category, or summary measures of exposure                                                                                                                         | 12-13   |

|    |                          |    |                                                                                                                                                                                                              |
|----|--------------------------|----|--------------------------------------------------------------------------------------------------------------------------------------------------------------------------------------------------------------|
| 1  |                          |    |                                                                                                                                                                                                              |
| 2  |                          |    |                                                                                                                                                                                                              |
| 3  |                          |    |                                                                                                                                                                                                              |
| 4  | Main results             | 16 | (a) Give unadjusted estimates and, if applicable, confounder-adjusted estimates and their precision (eg, 95% confidence interval). Make clear which confounders were adjusted for and why they were included |
| 5  |                          |    |                                                                                                                                                                                                              |
| 6  |                          |    |                                                                                                                                                                                                              |
| 7  |                          |    |                                                                                                                                                                                                              |
| 8  |                          |    | (b) Report category boundaries when continuous variables were categorized                                                                                                                                    |
| 9  |                          |    |                                                                                                                                                                                                              |
| 10 |                          |    | (c) If relevant, consider translating estimates of relative risk into absolute risk for a meaningful time period                                                                                             |
| 11 |                          |    |                                                                                                                                                                                                              |
| 12 | Other analyses           | 17 | Report other analyses done—eg analyses of subgroups and interactions, and sensitivity analyses                                                                                                               |
| 13 |                          |    |                                                                                                                                                                                                              |
| 14 |                          |    |                                                                                                                                                                                                              |
| 15 |                          |    |                                                                                                                                                                                                              |
| 16 | <b>Discussion</b>        |    |                                                                                                                                                                                                              |
| 17 | Key results              | 18 | Summarise key results with reference to study objectives                                                                                                                                                     |
| 18 |                          |    |                                                                                                                                                                                                              |
| 19 | Limitations              | 19 | Discuss limitations of the study, taking into account sources of potential bias or imprecision. Discuss both direction and magnitude of any potential bias                                                   |
| 20 |                          |    |                                                                                                                                                                                                              |
| 21 | Interpretation           | 20 | Give a cautious overall interpretation of results considering objectives, limitations, multiplicity of analyses, results from similar studies, and other relevant evidence                                   |
| 22 |                          |    |                                                                                                                                                                                                              |
| 23 | Generalisability         | 21 | Discuss the generalisability (external validity) of the study results                                                                                                                                        |
| 24 |                          |    |                                                                                                                                                                                                              |
| 25 | <b>Other information</b> |    |                                                                                                                                                                                                              |
| 26 | Funding                  | 22 | Give the source of funding and the role of the funders for the present study and, if applicable, for the original study on which the present article is based                                                |
| 27 |                          |    |                                                                                                                                                                                                              |
| 28 |                          |    |                                                                                                                                                                                                              |

29  
30 \*Give information separately for cases and controls.

31  
32  
33 **Note:** An Explanation and Elaboration article discusses each checklist item and gives methodological background and published examples of transparent reporting. The STROBE checklist is best used in conjunction with this article (freely available on the Web sites of PLoS Medicine at <http://www.plosmedicine.org/>, Annals of Internal Medicine at <http://www.annals.org/>, and Epidemiology at <http://www.epidem.com/>). Information on the STROBE Initiative is available at <http://www.strobe-statement.org>.

34  
35  
36  
37  
38  
39  
40  
41  
42  
43  
44  
45  
46  
47  
48  
49  
50  
51  
52  
53  
54  
55  
56  
57  
58  
59  
60
