# Supplementary material for: Dose–response association between physical activity and non-alcoholic fatty liver disease: a case–control study in a Chinese population
Source: PubMed Central journal article supplement — BMJ Open. 2019 Mar 30;9(3):e026854. doi: 10.1136/bmjopen-2018-026854 (PMC6475196; doi:10.1136/bmjopen-2018-026854), 2019-03-30
Supplement: bmjopen-2018-026854supp001.pdf [file bmjopen-2018-026854supp001.pdf]

Table S1. Association between physical activity and NAFLD

| Variable<br>(MET-minute/week) | Case<br>number | Control<br>number(%) | Univariate model<br>OR (95% CI) | Multivariate model 1<br>aOR (95% CI) | Multivariate model 2<br>aOR (95% CI) | Multivariate model 3<br>aOR (95% CI) |
|-------------------------------|----------------|----------------------|---------------------------------|--------------------------------------|--------------------------------------|--------------------------------------|
| Total amount of               |                |                      |                                 |                                      |                                      |                                      |
| ≤1620                         | 182 (33.5)     | 152 (28)             | 1 (reference)                   | 1 (reference)                        | 1 (reference)                        | 1 (reference)                        |
| 1620~3943.8                   | 180 (33.1)     | 200(36.8)            | 0.75(0.56-1.01)                 | 0.72 (0.52-1.00)                     | 0.72(0.52-1.01)                      | 0.74(0.53-1.03)                      |
| >3943.8                       | 181(33.3)      | 191(35.2)            | 0.79 (0.59-1.06)                | 0.75 (0.54-1.05)                     | 0.76(0.54-1.07)                      | 0.79(0.56-1.11)                      |
| <i>P</i> value for trend      |                |                      | 0.13                            | 0.11                                 | 0.13                                 | 0.19                                 |
| Light intensity               |                |                      |                                 |                                      |                                      |                                      |
| ≤840                          | 183 (33.7)     | 193 (35.5)           | 1 (reference)                   | 1 (reference)                        | 1 (reference)                        | 1 (reference)                        |
| 840~2100                      | 185 (34.1)     | 196(36.1)            | 1.00 (0.75-1.32)                | 0.97(0.70-1.34)                      | 0.98 (0.71-1.35)                     | 1.00(0.73-1.39)                      |
| >2100                         | 175 (32.2)     | 154 (28.4)           | 1.20 (0.89-1.61)                | 1.22(0.88-1.71)                      | 1.26(0.90-1.77)                      | 1.32(0.94-1.86)                      |
| <i>P</i> value for trend      |                |                      | 0.24                            | 0.24                                 | 0.19                                 | 0.12                                 |
| Moderate intensity            |                |                      |                                 |                                      |                                      |                                      |
| None                          | 223 (41.1)     | 193 (35.5)           | 1 (reference)                   | 1 (reference)                        | 1 (reference)                        | 1 (reference)                        |
| ≤840                          | 163 (30.0)     | 163 (30.0)           | 0.87(0.65-1.16)                 | 0.89 (0.64-1.23)                     | 0.89 (0.64-1.24)                     | 0.91(0.65-1.26)                      |
| >840                          | 157 (28.9)     | 187 (34.4)           | <b>0.73 (0.55-0.97) a</b>       | 0.80 (0.58-1.10)                     | 0.81(0.59-1.12)                      | 0.85(0.61-1.19)                      |
| <i>P</i> value for trend      |                |                      | <b>0.03</b>                     | 0.17                                 | 0.21                                 | 0.34                                 |
| Vigorous intensity            |                |                      |                                 |                                      |                                      |                                      |
| none                          | 432 (79.6)     | 400 (73.7)           | 1 (reference)                   | 1 (reference)                        | 1 (reference)                        | 1 (reference)                        |
| ≤960                          | 32 (5.9)       | 46(8.5)              | 0.64 (0.40-1.03)                | 0.70 (0.41-1.20)                     | 0.70(0.41-1.20)                      | 0.69(0.40-1.18)                      |
| >960                          | 79 (14.5)      | 97 (17.9)            | 0.75 (0.54-1.05)                | <b>0.67 (0.47-0.97) a</b>            | <b>0.68 (0.47-0.98) a</b>            | <b>0.64(0.44-0.93) a</b>             |
| <i>P</i> value for trend      |                |                      | 0.04                            | <b>0.02</b>                          | <b>0.02</b>                          | <b>0.06</b>                          |

NAFLD: Non-alcoholic fatty liver disease

Multivariate model 1: adjusted for BMI, hypertension, diabetes, and fasting blood glucose

Multivariate model 2: adjusted for BMI, hypertension, diabetes, fasting blood glucose and sedentary time.

Multivariate model 3: adjusted for BMI, hypertension, diabetes, fasting blood glucose, sedentary time and energy intake.

ORs = odds ratios, aOR= adjusted odds ratios, CIs = confidence intervals

a: P<0.05

Table S2. Association between physical activity and NAFLD in female

| Variable<br>(MET-minute/week) | Case<br>number | Control<br>number(%) | Univariate model<br>OR (95% CI) | Multivariate model 1<br>aOR (95% CI) | Multivariate model 2<br>aOR (95% CI) | Multivariate model 3<br>aOR (95% CI) |
|-------------------------------|----------------|----------------------|---------------------------------|--------------------------------------|--------------------------------------|--------------------------------------|
| <b>Total amount of</b>        |                |                      |                                 |                                      |                                      |                                      |
| ≤3010.2                       | 58 (33.7)      | 57 (33.1)            | 1 (reference)                   | 1 (reference)                        | 1 (reference)                        | 1 (reference)                        |
| 3010.2~5833.8                 | 65 (37.8)      | 58(33.7)             | 1.10(0.66-1.83)                 | 0.72 (0.40-1.30)                     | 0.73 (0.40-1.32)                     | 0.73(0.40-1.31)                      |
| >5833.8                       | 49(28.5)       | 57(33.1)             | 0.85 (0.50-1.43)                | 0.71 (0.39-1.30)                     | 0.73 (0.40-1.36)                     | 0.72(0.39-1.33)                      |
| <i>P</i> value for trend      |                |                      | 0.55                            | 0.27                                 | 0.32                                 | 0.29                                 |
| <b>Light intensity</b>        |                |                      |                                 |                                      |                                      |                                      |
| ≤1575                         | 57 (33.1)      | 60 (34.9)            | 1 (reference)                   | 1 (reference)                        | 1 (reference)                        | 1 (reference)                        |
| 1575~3150                     | 66(38.4)       | 66(38.4)             | 1.05 (0.64-1.73)                | 0.85(0.48-1.50)                      | 0.87 (0.49-1.55)                     | 0.88(0.50-1.57)                      |
| >3150                         | 49 (28.5)      | 46 (26.7)            | 1.12 (0.65-1.93)                | 0.75(0.40-1.41)                      | 0.77(0.41-1.48)                      | 0.76(0.40-1.46)                      |
| <i>P</i> value for trend      |                |                      | 0.68                            | 0.36                                 | 0.44                                 | 0.41                                 |
| <b>Moderate intensity</b>     |                |                      |                                 |                                      |                                      |                                      |
| ≤840                          | 72 (41.9)      | 67 (39)              | 1 (reference)                   | 1 (reference)                        | 1 (reference)                        | 1 (reference)                        |
| 840~1984.8                    | 50 (29.1)      | 48 (27.9)            | 0.97 (0.58-1.63)                | 0.81 (0.44-1.47)                     | 0.82 (0.45-1.51)                     | 0.82(0.45-1.50)                      |
| >1984.8                       | 50 (29.1)      | 57 (33.1)            | 0.82 (0.49-1.35)                | 0.78 (0.44-1.38)                     | 0.80 (0.45-1.42)                     | 0.80(0.45-1.43)                      |
| <i>P</i> value for trend      |                |                      | 0.44                            | 0.38                                 | 0.43                                 | 0.44                                 |
| <b>Vigorous intensity</b>     |                |                      |                                 |                                      |                                      |                                      |
| none                          | 160 (93)       | 149 (86.6)           | 1 (reference)                   | 1 (reference)                        | 1 (reference)                        | 1 (reference)                        |
| yes                           | 12 (7)         | 23 (13.4)            | 0.49 (0.23-1.01)                | 0.77 (0.34-1.76)                     | 0.77 (0.34-1.76)                     | 0.77(0.34-1.74)                      |

NAFLD: Non-alcoholic fatty liver disease

Multivariate model 1: adjusted for BMI, hypertension , diabetes, and fasting blood glucose

Multivariate model 2: adjusted for BMI, hypertension, diabetes, fasting blood glucose and sedentary time.

Multivariate model 3: adjusted for BMI, hypertension, diabetes, fasting blood glucose , sedentary time and energy intake.

ORs = odds ratios, aOR= adjusted odds ratios, CIs = confidence intervals

TableS3. the distribution of the three energy nutrients in the case and the control in males

| Variable                    | case                      | control                  | z            | p                             |
|-----------------------------|---------------------------|--------------------------|--------------|-------------------------------|
| Energy intake ( Kilojoule ) | 2456.70 (2074.46-2856.50) | 2364.34 (1933.76-2789.0) | <b>-2.42</b> | <b>0.02</b> <sup>a</sup>      |
| Carbohydrate(g)             | 349.64 (276.77-429.11)    | 349.45 (261.89-427.34)   | -0.90        | 0.37                          |
| Fat(g)                      | 79.37 (66.86-93.67)       | 71.97 (61.19-84.63)      | <b>-4.87</b> | <b>&lt;0.001</b> <sup>a</sup> |
| Protein(g)                  | 77.96 (65.05-93.07)       | 75.00 (62.38-91.73)      | -2.00        | 0.05                          |

a:P<0.05

TableS4. the distribution of the three energy nutrients in the case and the control in females

| Variable                    | case                     | control                  | z            | p                             |
|-----------------------------|--------------------------|--------------------------|--------------|-------------------------------|
| Energy intake ( Kilojoule ) | 1755.38(1540.99-2065.81) | 1669.87(1468.99-2014.09) | -1.71        | 0.09                          |
| Carbohydrate(g)             | 228.70(183.64-270.82)    | 233.72(194.89-278.61)    | -1.19        | 0.23                          |
| Fat(g)                      | 67.29(58.74-80.90)       | 57.90(49.91-67.89)       | <b>-5.45</b> | <b>&lt;0.001</b> <sup>a</sup> |
| Protein(g)                  | 57.44(49.57-68.92)       | 57.07(47.44-68.26)       | -0.40        | 0.69                          |

a:P<0.05

Table S5. Association between physical activity and NAFLD in male

| Variable<br>(MET-minute/week) | Case<br>number (%) | Control<br>number(%) | Multivariate model 1<br>aOR (95% CI) | Multivariate model 2<br>aOR (95% CI) | Multivariate model3<br>aOR (95% CI) | Multivariate model 4<br>aOR (95% CI) |
|-------------------------------|--------------------|----------------------|--------------------------------------|--------------------------------------|-------------------------------------|--------------------------------------|
| Total amount of               |                    |                      |                                      |                                      |                                     |                                      |
| ≤1440                         | 153 (41.2)         | 124 (33.4)           | 1 (reference)                        | 1 (reference)                        | 1 (reference)                       | 1 (reference)                        |
| 1440~3180                     | 104 (28.0)         | 124(33.4)            | <b>0.62 (0.41-0.91)<sup>a</sup></b>  | <b>0.62 (0.41-0.93)<sup>a</sup></b>  | <b>0.60 (0.40-0.91)<sup>a</sup></b> | <b>0.61(0.41-0.91)<sup>a</sup></b>   |
| >3180                         | 114(30.7)          | 123(33.2)            | <b>0.60(0.40-0.91)<sup>a</sup></b>   | <b>0.61 (0.41-0.92)<sup>a</sup></b>  | <b>0.58 (0.39-0.88)<sup>a</sup></b> | <b>0.60(0.40-0.89)<sup>a</sup></b>   |
| <i>P</i> value for trend      |                    |                      | <b>0.01</b>                          | <b>0.02</b>                          | <b>0.01</b>                         | <b>0.01</b>                          |
| Light intensity               |                    |                      |                                      |                                      |                                     |                                      |
| ≤525                          | 121 (32.6)         | 125 (33.7)           | 1 (reference)                        | 1 (reference)                        | 1 (reference)                       | 1 (reference)                        |
| 525~1500                      | 127(34.2)          | 125(33.7)            | 1.03(0.69-1.55)                      | 1.01(0.68-1.52)                      | 1.05 (0.70-1.57)                    | 1.02(0.68-1.52)                      |
| >1500                         | 123 (33.2)         | 121 (32.6)           | 0.95(0.63-1.44)                      | 0.96(0.64-1.45)                      | 0.94(0.62-1.41)                     | 0.94(0.63-1.42)                      |
| <i>P</i> value for trend      |                    |                      | 0.82                                 | 0.85                                 | 0.75                                | 0.79                                 |
| Moderate intensity            |                    |                      |                                      |                                      |                                     |                                      |
| None                          | 204 (55)           | 170 (45.8)           | 1 (reference)                        | 1 (reference)                        | 1 (reference)                       | 1 (reference)                        |
| ≤684                          | 74 (19.9)          | 79 (21.3)            | 0.78(0.51-1.20)                      | 0.79 (0.51-1.20)                     | 0.79 (0.51-1.22)                    | 0.78(0.51-1.20)                      |
| >684                          | 93 (25.1)          | 122 (32.9)           | <b>0.58(0.40-0.86)<sup>a</sup></b>   | <b>0.58 (0.39-0.86)<sup>a</sup></b>  | <b>0.60(0.40-0.88)<sup>a</sup></b>  | <b>0.58(0.40-0.86)<sup>a</sup></b>   |
| <i>P</i> value for trend      |                    |                      | <b>0.01</b>                          | <b>0.01</b>                          | <b>0.01</b>                         | <b>0.01</b>                          |
| Vigorous intensity            |                    |                      |                                      |                                      |                                     |                                      |
| none                          | 272 (73.3)         | 251 (67.7)           | 1 (reference)                        | 1 (reference)                        | 1 (reference)                       | 1 (reference)                        |
| ≤960                          | 28 (7.5)           | 35(9.4)              | 0.77(0.42-1.41)                      | 0.78(0.42-1.43)                      | 0.77(0.39-1.30)                     | 0.76(0.41-1.39)                      |
| >960                          | 71 (19.1)          | 85 (22.9)            | <b>0.63(0.41-0.95)<sup>a</sup></b>   | <b>0.64 (0.43-0.97)<sup>a</sup></b>  | <b>0.61(0.40-0.92)<sup>a</sup></b>  | <b>0.62(0.41-0.93)<sup>a</sup></b>   |
| <i>P</i> value for trend      |                    |                      | <b>0.02</b>                          | <b>0.03</b>                          | <b>0.02</b>                         | <b>0.02</b>                          |

NAFLD: Non-alcoholic fatty liver disease

Multivariate model 1: adjusted for BMI, hypertension, diabetes, fasting blood glucose, sedentary time and total energy intake

Multivariate model 2: adjusted for BMI, hypertension, diabetes, fasting blood glucose, sedentary time and carbohydrate

Multivariate model 3: adjusted for BMI, hypertension, diabetes, fasting blood glucose, sedentary time and fat

Multivariate model 4: adjusted for BMI, hypertension, diabetes, fasting blood glucose, sedentary time and protein

ORs = odds ratios, aOR= adjusted odds ratios, CIs = confidence intervals

a: P<0.05

*Table S6. Association between physical activity and NAFLD in female*

| Variable<br>(MET-minute/week) | Case<br>number | Control<br>number(%) | Multivariate model 1<br>aOR (95% CI) | Multivariate model 2<br>aOR (95% CI) | Multivariate model3<br>aOR (95% CI) | Multivariate model 4<br>aOR (95% CI) |
|-------------------------------|----------------|----------------------|--------------------------------------|--------------------------------------|-------------------------------------|--------------------------------------|
| <b>Total amount of</b>        |                |                      |                                      |                                      |                                     |                                      |
| ≤3010.2                       | 58 (33.7)      | 57 (33.1)            | 1 (reference)                        | 1 (reference)                        | 1 (reference)                       | 1 (reference)                        |
| 3010.2~5833.8                 | 65 (37.8)      | 58(33.7)             | 0.73(0.40-1.31)                      | 0.74 (0.41-1.35)                     | 0.80 (0.44-1.48)                    | 0.73(0.40-1.32)                      |
| >5833.8                       | 49(28.5)       | 57(33.1)             | 0.72(0.39-1.33)                      | 0.75 (0.41-1.40)                     | 0.75 (0.40-1.40)                    | 0.74(0.40-1.36)                      |
| <i>P</i> value for trend      |                |                      | 0.29                                 | 0.38                                 | 0.37                                | 0.32                                 |
| <b>Light intensity</b>        |                |                      |                                      |                                      |                                     |                                      |
| ≤1575                         | 57 (33.1)      | 60 (34.9)            | 1 (reference)                        | 1 (reference)                        | 1 (reference)                       | 1 (reference)                        |
| 1575~3150                     | 66(38.4)       | 66(38.4)             | 0.88(0.50-1.57)                      | 0.87(0.49-1.56)                      | 1.02 (0.56-1.84)                    | 0.86(0.48-1.54)                      |
| >3150                         | 49 (28.5)      | 46 (26.7)            | 0.76(0.40-1.46)                      | 0.80(0.42-1.52)                      | 0.80(0.41-1.55)                     | 0.77(0.41-1.48)                      |
| <i>P</i> value for trend      |                |                      | 0.41                                 | 0.36                                 | 0.53                                | 0.43                                 |
| <b>Moderate intensity</b>     |                |                      |                                      |                                      |                                     |                                      |
| ≤840                          | 72 (41.9)      | 67 (39)              | 1 (reference)                        | 1 (reference)                        | 1 (reference)                       | 1 (reference)                        |
| 840~1984.8                    | 50 (29.1)      | 48 (27.9)            | 0.82(0.45-1.50)                      | 0.84 (0.46-1.53)                     | 0.87(0.47-1.61)                     | 0.79(0.44-1.41)                      |
| >1984.8                       | 50 (29.1)      | 57 (33.1)            | 0.80(0.45-1.43)                      | 0.80 (0.45-1.43)                     | 0.87 (0.48-1.56)                    | 1.00(0.99-1.01)                      |
| <i>P</i> value for trend      |                |                      | 0.44                                 | 0.45                                 | 0.63                                | 0.42                                 |
| <b>Vigorous intensity</b>     |                |                      |                                      |                                      |                                     |                                      |
| none                          | 160 (93)       | 149 (86.6)           | 1 (reference)                        | 1 (reference)                        | 1 (reference)                       | 1 (reference)                        |
| yes                           | 12 (7)         | 23 (13.4)            | 0.77(0.34-1.74)                      | 0.77 (0.34-1.75)                     | 0.72 (0.31-1.66)                    | 0.78(0.34-1.79)                      |

NAFLD: Non-alcoholic fatty liver disease

Multivariate model 1: adjusted for BMI, hypertension, diabetes, fasting blood glucose, sedentary time and total energy intake

Multivariate model 2: adjusted for BMI, hypertension, diabetes, fasting blood glucose, sedentary time and carbohydrate

Multivariate model 3: adjusted for BMI, hypertension, diabetes, fasting blood glucose, sedentary time and fat

Multivariate model 4: adjusted for BMI, hypertension, diabetes, fasting blood glucose, sedentary time and protein

ORs = odds ratios, aOR= adjusted odds ratios, CIs = confidence intervals
